# Supplementary material for: Scleral ossicles: angiogenic scaffolds, a novel biomaterial for regenerative medicine applications
Source: Royal Society of Chemistry journal article supplement (doi:10.1039/c9bm01234f), 2019-11-06
Supplement: c9bm01234f1.xlsx [file c9bm01234f1.xlsx]

## Sheet: F004224
Supplementary Material 1
Header,"--------------------------------------------------------"
Search title,"2019.07.22_List-1 Trembl"
Timestamp,"2019-07-22T10:02:47Z"
User,"MChecchi"
Email,"marta.checchi@unimore.it"
Report URI,"http://mascot.cigs.unimo.it/mascot/cgi/master_results.pl?file=../data/20190722/F004224.dat"
Peak list data path,"20190514_SO_Angio_20190507_01.mgf"
Peak list format,"Mascot generic"
Search type,MIS
Mascot version,"2.4.1"
Database,"1::cRAP 2::Trembl"
Fasta file,"1::cRAP_20120229.fasta 2::Trembl_20160330.fasta"
Total sequences,63039775
Total residues,21078287921
Sequences after taxonomy filter,22024
Number of queries,16259
Warning,"No taxonomy indexes for cRAP, taxonomy ~Gallus Gallus~ ignored. Searching all entries in cRAP"
Decoy,"--------------------------------------------------------"
Number of matches above identity threshold in search of real database,411
Number of matches above identity threshold in search of decoy database,6
Number of matches above homology threshold in search of real database,732
Number of matches above homology threshold in search of decoy database,6
Variable modifications,"--------------------------------------------------------"
Identifier,"Name","Delta","Neutral loss(es)"
1,"Deamidated (NQ)",0.984016
2,"Oxidation (M)",15.994915,0,63.998285
Search Parameters,"--------------------------------------------------------"
Taxonomy filter,". . . . . . . . . . Gallus Gallus"
Enzyme,"Trypsin"
Maximum Missed Cleavages,1
Fixed modifications,""
Quantitation method,"None"
Variable modifications,"Deamidated (NQ),Oxidation (M)"
Peptide Mass Tolerance,10
Peptide Mass Tolerance Units,ppm
Fragment Mass Tolerance,0.01
Fragment Mass Tolerance Units,Da
Mass values,Monoisotopic
Instrument type,"Default"
Isotope error mode,1
Decoy database also searched,1
Format parameters,"--------------------------------------------------------"
Significance threshold,0.00025
Max. number of hits,0
Use MudPIT protein scoring,1
Ions score cut-off,0
Include same-set proteins,0
Include sub-set proteins,1
Include unassigned,0
Require bold red,0
Use homology threshold,1
Group protein families,1
Re-score using Percolator,0
Protein hits,"--------------------------------------------------------"
prot_hit_num	prot_family_member	prot_acc	prot_desc	prot_score	prot_mass	prot_cover	pep_query	pep_rank	pep_isbold	pep_isunique	pep_exp_mz	pep_miss
1	1	2::F1NX22_CHICK	Collagen alpha-1(XII) chain OS=Gallus gallus GN=COL12A1 PE=4 SV=2	1438	339594	44.5	1224	2	1	1	2591533	0
1	1	2::F1NX22_CHICK	Collagen alpha-1(XII) chain OS=Gallus gallus GN=COL12A1 PE=4 SV=2	1438	339594	44.5	1539	3	1	1	2731744	0
1	1	2::F1NX22_CHICK	Collagen alpha-1(XII) chain OS=Gallus gallus GN=COL12A1 PE=4 SV=2	1438	339594	44.5	1540	2	1	1	2731746	0
1	1	2::F1NX22_CHICK	Collagen alpha-1(XII) chain OS=Gallus gallus GN=COL12A1 PE=4 SV=2	1438	339594	44.5	2153	5	1	1	2951819	0
1	1	2::F1NX22_CHICK	Collagen alpha-1(XII) chain OS=Gallus gallus GN=COL12A1 PE=4 SV=2	1438	339594	44.5	2360	1	1	1	3101563	0
1	1	2::F1NX22_CHICK	Collagen alpha-1(XII) chain OS=Gallus gallus GN=COL12A1 PE=4 SV=2	1438	339594	44.5	2610	1	1	1	3206688	0
1	1	2::F1NX22_CHICK	Collagen alpha-1(XII) chain OS=Gallus gallus GN=COL12A1 PE=4 SV=2	1438	339594	44.5	2724	1	1	1	3276586	0
1	1	2::F1NX22_CHICK	Collagen alpha-1(XII) chain OS=Gallus gallus GN=COL12A1 PE=4 SV=2	1438	339594	44.5	2868	1	1	1	3326873	0
1	1	2::F1NX22_CHICK	Collagen alpha-1(XII) chain OS=Gallus gallus GN=COL12A1 PE=4 SV=2	1438	339594	44.5	2977	1	1	1	3407024	0
1	1	2::F1NX22_CHICK	Collagen alpha-1(XII) chain OS=Gallus gallus GN=COL12A1 PE=4 SV=2	1438	339594	44.5	3254	1	1	1	3501749	0
1	1	2::F1NX22_CHICK	Collagen alpha-1(XII) chain OS=Gallus gallus GN=COL12A1 PE=4 SV=2	1438	339594	44.5	3318	1	1	1	3527132	0
1	1	2::F1NX22_CHICK	Collagen alpha-1(XII) chain OS=Gallus gallus GN=COL12A1 PE=4 SV=2	1438	339594	44.5	3319	1	1	1	3527134	0
1	1	2::F1NX22_CHICK	Collagen alpha-1(XII) chain OS=Gallus gallus GN=COL12A1 PE=4 SV=2	1438	339594	44.5	3320	1	1	1	3527134	0
1	1	2::F1NX22_CHICK	Collagen alpha-1(XII) chain OS=Gallus gallus GN=COL12A1 PE=4 SV=2	1438	339594	44.5	3321	1	1	1	3527135	0
1	1	2::F1NX22_CHICK	Collagen alpha-1(XII) chain OS=Gallus gallus GN=COL12A1 PE=4 SV=2	1438	339594	44.5	3322	1	1	1	3527136	0
1	1	2::F1NX22_CHICK	Collagen alpha-1(XII) chain OS=Gallus gallus GN=COL12A1 PE=4 SV=2	1438	339594	44.5	3323	1	1	1	3527136	0
1	1	2::F1NX22_CHICK	Collagen alpha-1(XII) chain OS=Gallus gallus GN=COL12A1 PE=4 SV=2	1438	339594	44.5	3577	1	1	1	3671781	0
1	1	2::F1NX22_CHICK	Collagen alpha-1(XII) chain OS=Gallus gallus GN=COL12A1 PE=4 SV=2	1438	339594	44.5	3850	1	1	1	3801913	0
1	1	2::F1NX22_CHICK	Collagen alpha-1(XII) chain OS=Gallus gallus GN=COL12A1 PE=4 SV=2	1438	339594	44.5	3867	4	1	1	3806959	0
1	1	2::F1NX22_CHICK	Collagen alpha-1(XII) chain OS=Gallus gallus GN=COL12A1 PE=4 SV=2	1438	339594	44.5	3885	1	1	1	3816951	0
1	1	2::F1NX22_CHICK	Collagen alpha-1(XII) chain OS=Gallus gallus GN=COL12A1 PE=4 SV=2	1438	339594	44.5	4151	1	1	1	3946886	0
1	1	2::F1NX22_CHICK	Collagen alpha-1(XII) chain OS=Gallus gallus GN=COL12A1 PE=4 SV=2	1438	339594	44.5	4266	1	1	1	4012225	1
1	1	2::F1NX22_CHICK	Collagen alpha-1(XII) chain OS=Gallus gallus GN=COL12A1 PE=4 SV=2	1438	339594	44.5	4275	1	1	1	4017249	0
1	1	2::F1NX22_CHICK	Collagen alpha-1(XII) chain OS=Gallus gallus GN=COL12A1 PE=4 SV=2	1438	339594	44.5	4277	1	1	1	4017252	0
1	1	2::F1NX22_CHICK	Collagen alpha-1(XII) chain OS=Gallus gallus GN=COL12A1 PE=4 SV=2	1438	339594	44.5	4278	1	1	1	4017253	0
1	1	2::F1NX22_CHICK	Collagen alpha-1(XII) chain OS=Gallus gallus GN=COL12A1 PE=4 SV=2	1438	339594	44.5	4384	1	1	1	4082355	0
1	1	2::F1NX22_CHICK	Collagen alpha-1(XII) chain OS=Gallus gallus GN=COL12A1 PE=4 SV=2	1438	339594	44.5	4385	1	1	1	4082356	0
1	1	2::F1NX22_CHICK	Collagen alpha-1(XII) chain OS=Gallus gallus GN=COL12A1 PE=4 SV=2	1438	339594	44.5	4387	1	1	1	4082360	0
1	1	2::F1NX22_CHICK	Collagen alpha-1(XII) chain OS=Gallus gallus GN=COL12A1 PE=4 SV=2	1438	339594	44.5	4511	1	1	1	4147334	0
1	1	2::F1NX22_CHICK	Collagen alpha-1(XII) chain OS=Gallus gallus GN=COL12A1 PE=4 SV=2	1438	339594	44.5	4515	1	1	1	4152126	0
1	1	2::F1NX22_CHICK	Collagen alpha-1(XII) chain OS=Gallus gallus GN=COL12A1 PE=4 SV=2	1438	339594	44.5	4563	1	1	1	4182199	0
1	1	2::F1NX22_CHICK	Collagen alpha-1(XII) chain OS=Gallus gallus GN=COL12A1 PE=4 SV=2	1438	339594	44.5	4564	1	1	1	4182200	0
1	1	2::F1NX22_CHICK	Collagen alpha-1(XII) chain OS=Gallus gallus GN=COL12A1 PE=4 SV=2	1438	339594	44.5	4625	6	1	1	4217538	1
1	1	2::F1NX22_CHICK	Collagen alpha-1(XII) chain OS=Gallus gallus GN=COL12A1 PE=4 SV=2	1438	339594	44.5	4856	1	1	1	4307223	0
1	1	2::F1NX22_CHICK	Collagen alpha-1(XII) chain OS=Gallus gallus GN=COL12A1 PE=4 SV=2	1438	339594	44.5	4857	3	1	1	4307223	0
1	1	2::F1NX22_CHICK	Collagen alpha-1(XII) chain OS=Gallus gallus GN=COL12A1 PE=4 SV=2	1438	339594	44.5	4858	1	1	1	4307223	0
1	1	2::F1NX22_CHICK	Collagen alpha-1(XII) chain OS=Gallus gallus GN=COL12A1 PE=4 SV=2	1438	339594	44.5	5174	1	1	1	4377488	0
1	1	2::F1NX22_CHICK	Collagen alpha-1(XII) chain OS=Gallus gallus GN=COL12A1 PE=4 SV=2	1438	339594	44.5	5175	1	1	1	4377489	0
1	1	2::F1NX22_CHICK	Collagen alpha-1(XII) chain OS=Gallus gallus GN=COL12A1 PE=4 SV=2	1438	339594	44.5	5176	1	1	1	4377489	0
1	1	2::F1NX22_CHICK	Collagen alpha-1(XII) chain OS=Gallus gallus GN=COL12A1 PE=4 SV=2	1438	339594	44.5	5268	4	1	1	4427645	1
1	1	2::F1NX22_CHICK	Collagen alpha-1(XII) chain OS=Gallus gallus GN=COL12A1 PE=4 SV=2	1438	339594	44.5	5269	7	1	1	4427646	1
1	1	2::F1NX22_CHICK	Collagen alpha-1(XII) chain OS=Gallus gallus GN=COL12A1 PE=4 SV=2	1438	339594	44.5	5302	1	1	1	2965239	0
1	1	2::F1NX22_CHICK	Collagen alpha-1(XII) chain OS=Gallus gallus GN=COL12A1 PE=4 SV=2	1438	339594	44.5	5304	1	1	1	4442823	0
1	1	2::F1NX22_CHICK	Collagen alpha-1(XII) chain OS=Gallus gallus GN=COL12A1 PE=4 SV=2	1438	339594	44.5	5306	1	1	1	2965241	0
1	1	2::F1NX22_CHICK	Collagen alpha-1(XII) chain OS=Gallus gallus GN=COL12A1 PE=4 SV=2	1438	339594	44.5	5307	1	1	1	2965241	0
1	1	2::F1NX22_CHICK	Collagen alpha-1(XII) chain OS=Gallus gallus GN=COL12A1 PE=4 SV=2	1438	339594	44.5	5308	1	1	1	2965241	0
1	1	2::F1NX22_CHICK	Collagen alpha-1(XII) chain OS=Gallus gallus GN=COL12A1 PE=4 SV=2	1438	339594	44.5	5707	1	1	1	4582669	0
1	1	2::F1NX22_CHICK	Collagen alpha-1(XII) chain OS=Gallus gallus GN=COL12A1 PE=4 SV=2	1438	339594	44.5	5708	1	1	1	4582673	0
1	1	2::F1NX22_CHICK	Collagen alpha-1(XII) chain OS=Gallus gallus GN=COL12A1 PE=4 SV=2	1438	339594	44.5	5710	1	1	1	4582799	0
1	1	2::F1NX22_CHICK	Collagen alpha-1(XII) chain OS=Gallus gallus GN=COL12A1 PE=4 SV=2	1438	339594	44.5	5711	1	1	1	4582800	0
1	1	2::F1NX22_CHICK	Collagen alpha-1(XII) chain OS=Gallus gallus GN=COL12A1 PE=4 SV=2	1438	339594	44.5	5712	1	1	1	4582801	0
1	1	2::F1NX22_CHICK	Collagen alpha-1(XII) chain OS=Gallus gallus GN=COL12A1 PE=4 SV=2	1438	339594	44.5	5713	1	1	1	4582803	0
1	1	2::F1NX22_CHICK	Collagen alpha-1(XII) chain OS=Gallus gallus GN=COL12A1 PE=4 SV=2	1438	339594	44.5	5714	1	1	1	4582803	0
1	1	2::F1NX22_CHICK	Collagen alpha-1(XII) chain OS=Gallus gallus GN=COL12A1 PE=4 SV=2	1438	339594	44.5	5715	1	1	1	4582803	0
1	1	2::F1NX22_CHICK	Collagen alpha-1(XII) chain OS=Gallus gallus GN=COL12A1 PE=4 SV=2	1438	339594	44.5	5716	1	1	1	4582804	0
1	1	2::F1NX22_CHICK	Collagen alpha-1(XII) chain OS=Gallus gallus GN=COL12A1 PE=4 SV=2	1438	339594	44.5	5777	1	1	1	4617497	0
1	1	2::F1NX22_CHICK	Collagen alpha-1(XII) chain OS=Gallus gallus GN=COL12A1 PE=4 SV=2	1438	339594	44.5	5778	1	1	1	4617497	0
1	1	2::F1NX22_CHICK	Collagen alpha-1(XII) chain OS=Gallus gallus GN=COL12A1 PE=4 SV=2	1438	339594	44.5	5779	1	1	1	4617504	0
1	1	2::F1NX22_CHICK	Collagen alpha-1(XII) chain OS=Gallus gallus GN=COL12A1 PE=4 SV=2	1438	339594	44.5	5894	1	1	1	4667208	0
1	1	2::F1NX22_CHICK	Collagen alpha-1(XII) chain OS=Gallus gallus GN=COL12A1 PE=4 SV=2	1438	339594	44.5	5895	1	1	1	4667209	0
1	1	2::F1NX22_CHICK	Collagen alpha-1(XII) chain OS=Gallus gallus GN=COL12A1 PE=4 SV=2	1438	339594	44.5	5961	1	1	1	4697471	0
1	1	2::F1NX22_CHICK	Collagen alpha-1(XII) chain OS=Gallus gallus GN=COL12A1 PE=4 SV=2	1438	339594	44.5	6164	7	1	1	4787934	0
1	1	2::F1NX22_CHICK	Collagen alpha-1(XII) chain OS=Gallus gallus GN=COL12A1 PE=4 SV=2	1438	339594	44.5	6165	1	1	1	4787934	0
1	1	2::F1NX22_CHICK	Collagen alpha-1(XII) chain OS=Gallus gallus GN=COL12A1 PE=4 SV=2	1438	339594	44.5	6166	7	1	1	4787936	0
1	1	2::F1NX22_CHICK	Collagen alpha-1(XII) chain OS=Gallus gallus GN=COL12A1 PE=4 SV=2	1438	339594	44.5	6167	1	1	1	4787937	0
1	1	2::F1NX22_CHICK	Collagen alpha-1(XII) chain OS=Gallus gallus GN=COL12A1 PE=4 SV=2	1438	339594	44.5	6168	1	1	1	4787943	0
1	1	2::F1NX22_CHICK	Collagen alpha-1(XII) chain OS=Gallus gallus GN=COL12A1 PE=4 SV=2	1438	339594	44.5	6182	1	1	1	4792909	0
1	1	2::F1NX22_CHICK	Collagen alpha-1(XII) chain OS=Gallus gallus GN=COL12A1 PE=4 SV=2	1438	339594	44.5	6184	1	1	1	4792912	0
1	1	2::F1NX22_CHICK	Collagen alpha-1(XII) chain OS=Gallus gallus GN=COL12A1 PE=4 SV=2	1438	339594	44.5	6185	1	1	1	4792914	0
1	1	2::F1NX22_CHICK	Collagen alpha-1(XII) chain OS=Gallus gallus GN=COL12A1 PE=4 SV=2	1438	339594	44.5	6457	1	1	1	4952902	0
1	1	2::F1NX22_CHICK	Collagen alpha-1(XII) chain OS=Gallus gallus GN=COL12A1 PE=4 SV=2	1438	339594	44.5	6458	1	1	1	4952903	0
1	1	2::F1NX22_CHICK	Collagen alpha-1(XII) chain OS=Gallus gallus GN=COL12A1 PE=4 SV=2	1438	339594	44.5	6577	1	1	1	5022626	0
1	1	2::F1NX22_CHICK	Collagen alpha-1(XII) chain OS=Gallus gallus GN=COL12A1 PE=4 SV=2	1438	339594	44.5	6578	1	1	1	5022631	0
1	1	2::F1NX22_CHICK	Collagen alpha-1(XII) chain OS=Gallus gallus GN=COL12A1 PE=4 SV=2	1438	339594	44.5	6633	1	1	1	5067656	0
1	1	2::F1NX22_CHICK	Collagen alpha-1(XII) chain OS=Gallus gallus GN=COL12A1 PE=4 SV=2	1438	339594	44.5	6793	1	1	1	5158001	1
1	1	2::F1NX22_CHICK	Collagen alpha-1(XII) chain OS=Gallus gallus GN=COL12A1 PE=4 SV=2	1438	339594	44.5	6875	1	1	1	5207513	0
1	1	2::F1NX22_CHICK	Collagen alpha-1(XII) chain OS=Gallus gallus GN=COL12A1 PE=4 SV=2	1438	339594	44.5	6876	1	1	1	5207513	0
1	1	2::F1NX22_CHICK	Collagen alpha-1(XII) chain OS=Gallus gallus GN=COL12A1 PE=4 SV=2	1438	339594	44.5	6905	1	1	1	5217994	0
1	1	2::F1NX22_CHICK	Collagen alpha-1(XII) chain OS=Gallus gallus GN=COL12A1 PE=4 SV=2	1438	339594	44.5	6906	1	1	1	5217994	0
1	1	2::F1NX22_CHICK	Collagen alpha-1(XII) chain OS=Gallus gallus GN=COL12A1 PE=4 SV=2	1438	339594	44.5	6983	1	1	1	5272527	0
1	1	2::F1NX22_CHICK	Collagen alpha-1(XII) chain OS=Gallus gallus GN=COL12A1 PE=4 SV=2	1438	339594	44.5	6984	1	1	1	5272530	0
1	1	2::F1NX22_CHICK	Collagen alpha-1(XII) chain OS=Gallus gallus GN=COL12A1 PE=4 SV=2	1438	339594	44.5	7182	1	1	1	5397719	0
1	1	2::F1NX22_CHICK	Collagen alpha-1(XII) chain OS=Gallus gallus GN=COL12A1 PE=4 SV=2	1438	339594	44.5	7190	1	1	1	3611658	0
1	1	2::F1NX22_CHICK	Collagen alpha-1(XII) chain OS=Gallus gallus GN=COL12A1 PE=4 SV=2	1438	339594	44.5	7191	1	1	1	5412451	0
1	1	2::F1NX22_CHICK	Collagen alpha-1(XII) chain OS=Gallus gallus GN=COL12A1 PE=4 SV=2	1438	339594	44.5	7192	1	1	1	5412452	0
1	1	2::F1NX22_CHICK	Collagen alpha-1(XII) chain OS=Gallus gallus GN=COL12A1 PE=4 SV=2	1438	339594	44.5	7398	1	1	1	5518280	0
1	1	2::F1NX22_CHICK	Collagen alpha-1(XII) chain OS=Gallus gallus GN=COL12A1 PE=4 SV=2	1438	339594	44.5	7402	1	1	1	5522695	0
1	1	2::F1NX22_CHICK	Collagen alpha-1(XII) chain OS=Gallus gallus GN=COL12A1 PE=4 SV=2	1438	339594	44.5	7403	1	1	1	5522709	0
1	1	2::F1NX22_CHICK	Collagen alpha-1(XII) chain OS=Gallus gallus GN=COL12A1 PE=4 SV=2	1438	339594	44.5	7404	1	1	1	5522709	0
1	1	2::F1NX22_CHICK	Collagen alpha-1(XII) chain OS=Gallus gallus GN=COL12A1 PE=4 SV=2	1438	339594	44.5	7512	1	1	1	5597441	0
1	1	2::F1NX22_CHICK	Collagen alpha-1(XII) chain OS=Gallus gallus GN=COL12A1 PE=4 SV=2	1438	339594	44.5	7513	1	1	1	5597443	0
1	1	2::F1NX22_CHICK	Collagen alpha-1(XII) chain OS=Gallus gallus GN=COL12A1 PE=4 SV=2	1438	339594	44.5	7613	1	1	1	5642887	0
1	1	2::F1NX22_CHICK	Collagen alpha-1(XII) chain OS=Gallus gallus GN=COL12A1 PE=4 SV=2	1438	339594	44.5	7614	1	1	1	5642897	0
1	1	2::F1NX22_CHICK	Collagen alpha-1(XII) chain OS=Gallus gallus GN=COL12A1 PE=4 SV=2	1438	339594	44.5	7860	1	1	1	5797543	0
1	1	2::F1NX22_CHICK	Collagen alpha-1(XII) chain OS=Gallus gallus GN=COL12A1 PE=4 SV=2	1438	339594	44.5	7861	1	1	1	5797544	0
1	1	2::F1NX22_CHICK	Collagen alpha-1(XII) chain OS=Gallus gallus GN=COL12A1 PE=4 SV=2	1438	339594	44.5	7923	1	1	1	5828181	0
1	1	2::F1NX22_CHICK	Collagen alpha-1(XII) chain OS=Gallus gallus GN=COL12A1 PE=4 SV=2	1438	339594	44.5	7924	1	1	1	5828181	0
1	1	2::F1NX22_CHICK	Collagen alpha-1(XII) chain OS=Gallus gallus GN=COL12A1 PE=4 SV=2	1438	339594	44.5	7944	1	1	1	5837832	0
1	1	2::F1NX22_CHICK	Collagen alpha-1(XII) chain OS=Gallus gallus GN=COL12A1 PE=4 SV=2	1438	339594	44.5	7972	1	1	1	5852839	0
1	1	2::F1NX22_CHICK	Collagen alpha-1(XII) chain OS=Gallus gallus GN=COL12A1 PE=4 SV=2	1438	339594	44.5	7973	1	1	1	5852840	0
1	1	2::F1NX22_CHICK	Collagen alpha-1(XII) chain OS=Gallus gallus GN=COL12A1 PE=4 SV=2	1438	339594	44.5	8100	1	1	1	3949006	0
1	1	2::F1NX22_CHICK	Collagen alpha-1(XII) chain OS=Gallus gallus GN=COL12A1 PE=4 SV=2	1438	339594	44.5	8101	1	1	1	5918475	0
1	1	2::F1NX22_CHICK	Collagen alpha-1(XII) chain OS=Gallus gallus GN=COL12A1 PE=4 SV=2	1438	339594	44.5	8308	1	1	1	6048372	1
1	1	2::F1NX22_CHICK	Collagen alpha-1(XII) chain OS=Gallus gallus GN=COL12A1 PE=4 SV=2	1438	339594	44.5	8368	1	1	1	4061915	0
1	1	2::F1NX22_CHICK	Collagen alpha-1(XII) chain OS=Gallus gallus GN=COL12A1 PE=4 SV=2	1438	339594	44.5	8369	1	1	1	6087839	0
1	1	2::F1NX22_CHICK	Collagen alpha-1(XII) chain OS=Gallus gallus GN=COL12A1 PE=4 SV=2	1438	339594	44.5	8370	1	1	1	4061920	0
1	1	2::F1NX22_CHICK	Collagen alpha-1(XII) chain OS=Gallus gallus GN=COL12A1 PE=4 SV=2	1438	339594	44.5	8516	1	1	1	6163336	0
1	1	2::F1NX22_CHICK	Collagen alpha-1(XII) chain OS=Gallus gallus GN=COL12A1 PE=4 SV=2	1438	339594	44.5	8517	1	1	1	6163337	0
1	1	2::F1NX22_CHICK	Collagen alpha-1(XII) chain OS=Gallus gallus GN=COL12A1 PE=4 SV=2	1438	339594	44.5	8518	1	1	1	6163340	0
1	1	2::F1NX22_CHICK	Collagen alpha-1(XII) chain OS=Gallus gallus GN=COL12A1 PE=4 SV=2	1438	339594	44.5	8588	1	1	1	6213415	0
1	1	2::F1NX22_CHICK	Collagen alpha-1(XII) chain OS=Gallus gallus GN=COL12A1 PE=4 SV=2	1438	339594	44.5	8589	1	1	1	6213421	0
1	1	2::F1NX22_CHICK	Collagen alpha-1(XII) chain OS=Gallus gallus GN=COL12A1 PE=4 SV=2	1438	339594	44.5	8590	1	1	1	6213443	0
1	1	2::F1NX22_CHICK	Collagen alpha-1(XII) chain OS=Gallus gallus GN=COL12A1 PE=4 SV=2	1438	339594	44.5	8608	1	1	1	6232873	0
1	1	2::F1NX22_CHICK	Collagen alpha-1(XII) chain OS=Gallus gallus GN=COL12A1 PE=4 SV=2	1438	339594	44.5	8609	1	1	1	4158620	0
1	1	2::F1NX22_CHICK	Collagen alpha-1(XII) chain OS=Gallus gallus GN=COL12A1 PE=4 SV=2	1438	339594	44.5	8610	1	1	1	4158622	0
1	1	2::F1NX22_CHICK	Collagen alpha-1(XII) chain OS=Gallus gallus GN=COL12A1 PE=4 SV=2	1438	339594	44.5	8723	1	1	1	4209078	0
1	1	2::F1NX22_CHICK	Collagen alpha-1(XII) chain OS=Gallus gallus GN=COL12A1 PE=4 SV=2	1438	339594	44.5	8735	1	1	1	4215597	0
1	1	2::F1NX22_CHICK	Collagen alpha-1(XII) chain OS=Gallus gallus GN=COL12A1 PE=4 SV=2	1438	339594	44.5	8736	1	1	1	6318364	0
1	1	2::F1NX22_CHICK	Collagen alpha-1(XII) chain OS=Gallus gallus GN=COL12A1 PE=4 SV=2	1438	339594	44.5	8737	1	1	1	6318370	0
1	1	2::F1NX22_CHICK	Collagen alpha-1(XII) chain OS=Gallus gallus GN=COL12A1 PE=4 SV=2	1438	339594	44.5	8826	1	1	1	6383701	0
1	1	2::F1NX22_CHICK	Collagen alpha-1(XII) chain OS=Gallus gallus GN=COL12A1 PE=4 SV=2	1438	339594	44.5	9037	1	1	1	6538493	0
1	1	2::F1NX22_CHICK	Collagen alpha-1(XII) chain OS=Gallus gallus GN=COL12A1 PE=4 SV=2	1438	339594	44.5	9038	1	1	1	6538493	0
1	1	2::F1NX22_CHICK	Collagen alpha-1(XII) chain OS=Gallus gallus GN=COL12A1 PE=4 SV=2	1438	339594	44.5	9057	1	1	1	6548288	0
1	1	2::F1NX22_CHICK	Collagen alpha-1(XII) chain OS=Gallus gallus GN=COL12A1 PE=4 SV=2	1438	339594	44.5	9069	1	1	1	6553337	0
1	1	2::F1NX22_CHICK	Collagen alpha-1(XII) chain OS=Gallus gallus GN=COL12A1 PE=4 SV=2	1438	339594	44.5	9070	1	1	1	6553346	0
1	1	2::F1NX22_CHICK	Collagen alpha-1(XII) chain OS=Gallus gallus GN=COL12A1 PE=4 SV=2	1438	339594	44.5	9071	1	1	1	4372260	0
1	1	2::F1NX22_CHICK	Collagen alpha-1(XII) chain OS=Gallus gallus GN=COL12A1 PE=4 SV=2	1438	339594	44.5	9804	1	1	1	4685817	0
1	1	2::F1NX22_CHICK	Collagen alpha-1(XII) chain OS=Gallus gallus GN=COL12A1 PE=4 SV=2	1438	339594	44.5	9805	1	1	1	7023690	0
1	1	2::F1NX22_CHICK	Collagen alpha-1(XII) chain OS=Gallus gallus GN=COL12A1 PE=4 SV=2	1438	339594	44.5	9806	1	1	1	7023692	0
1	1	2::F1NX22_CHICK	Collagen alpha-1(XII) chain OS=Gallus gallus GN=COL12A1 PE=4 SV=2	1438	339594	44.5	9807	1	1	1	4685821	0
1	1	2::F1NX22_CHICK	Collagen alpha-1(XII) chain OS=Gallus gallus GN=COL12A1 PE=4 SV=2	1438	339594	44.5	9889	1	1	1	7083769	0
1	1	2::F1NX22_CHICK	Collagen alpha-1(XII) chain OS=Gallus gallus GN=COL12A1 PE=4 SV=2	1438	339594	44.5	9890	1	1	1	7083772	0
1	1	2::F1NX22_CHICK	Collagen alpha-1(XII) chain OS=Gallus gallus GN=COL12A1 PE=4 SV=2	1438	339594	44.5	9891	1	1	1	7083776	0
1	1	2::F1NX22_CHICK	Collagen alpha-1(XII) chain OS=Gallus gallus GN=COL12A1 PE=4 SV=2	1438	339594	44.5	9980	1	1	1	7143585	0
1	1	2::F1NX22_CHICK	Collagen alpha-1(XII) chain OS=Gallus gallus GN=COL12A1 PE=4 SV=2	1438	339594	44.5	10012	1	1	1	4779296	0
1	1	2::F1NX22_CHICK	Collagen alpha-1(XII) chain OS=Gallus gallus GN=COL12A1 PE=4 SV=2	1438	339594	44.5	10013	1	1	1	7163910	0
1	1	2::F1NX22_CHICK	Collagen alpha-1(XII) chain OS=Gallus gallus GN=COL12A1 PE=4 SV=2	1438	339594	44.5	10219	1	1	1	7309049	0
1	1	2::F1NX22_CHICK	Collagen alpha-1(XII) chain OS=Gallus gallus GN=COL12A1 PE=4 SV=2	1438	339594	44.5	10220	1	1	1	4876059	0
1	1	2::F1NX22_CHICK	Collagen alpha-1(XII) chain OS=Gallus gallus GN=COL12A1 PE=4 SV=2	1438	339594	44.5	10222	1	1	1	4876060	0
1	1	2::F1NX22_CHICK	Collagen alpha-1(XII) chain OS=Gallus gallus GN=COL12A1 PE=4 SV=2	1438	339594	44.5	10223	1	1	1	7309054	0
1	1	2::F1NX22_CHICK	Collagen alpha-1(XII) chain OS=Gallus gallus GN=COL12A1 PE=4 SV=2	1438	339594	44.5	10224	1	1	1	7309054	0
1	1	2::F1NX22_CHICK	Collagen alpha-1(XII) chain OS=Gallus gallus GN=COL12A1 PE=4 SV=2	1438	339594	44.5	10225	1	1	1	4876061	0
1	1	2::F1NX22_CHICK	Collagen alpha-1(XII) chain OS=Gallus gallus GN=COL12A1 PE=4 SV=2	1438	339594	44.5	10279	1	1	1	7353566	0
1	1	2::F1NX22_CHICK	Collagen alpha-1(XII) chain OS=Gallus gallus GN=COL12A1 PE=4 SV=2	1438	339594	44.5	10280	1	1	1	4905744	0
1	1	2::F1NX22_CHICK	Collagen alpha-1(XII) chain OS=Gallus gallus GN=COL12A1 PE=4 SV=2	1438	339594	44.5	10314	1	1	1	7388389	0
1	1	2::F1NX22_CHICK	Collagen alpha-1(XII) chain OS=Gallus gallus GN=COL12A1 PE=4 SV=2	1438	339594	44.5	10316	1	1	1	7388393	0
1	1	2::F1NX22_CHICK	Collagen alpha-1(XII) chain OS=Gallus gallus GN=COL12A1 PE=4 SV=2	1438	339594	44.5	10317	1	1	1	4928957	0
1	1	2::F1NX22_CHICK	Collagen alpha-1(XII) chain OS=Gallus gallus GN=COL12A1 PE=4 SV=2	1438	339594	44.5	10388	1	1	1	4962725	1
1	1	2::F1NX22_CHICK	Collagen alpha-1(XII) chain OS=Gallus gallus GN=COL12A1 PE=4 SV=2	1438	339594	44.5	10389	1	1	1	4962726	1
1	1	2::F1NX22_CHICK	Collagen alpha-1(XII) chain OS=Gallus gallus GN=COL12A1 PE=4 SV=2	1438	339594	44.5	10561	1	1	1	7553474	0
1	1	2::F1NX22_CHICK	Collagen alpha-1(XII) chain OS=Gallus gallus GN=COL12A1 PE=4 SV=2	1438	339594	44.5	10562	1	1	1	7553479	0
1	1	2::F1NX22_CHICK	Collagen alpha-1(XII) chain OS=Gallus gallus GN=COL12A1 PE=4 SV=2	1438	339594	44.5	10563	1	1	1	5039011	0
1	1	2::F1NX22_CHICK	Collagen alpha-1(XII) chain OS=Gallus gallus GN=COL12A1 PE=4 SV=2	1438	339594	44.5	10712	1	1	1	7663942	0
1	1	2::F1NX22_CHICK	Collagen alpha-1(XII) chain OS=Gallus gallus GN=COL12A1 PE=4 SV=2	1438	339594	44.5	10713	1	1	1	5112657	0
1	1	2::F1NX22_CHICK	Collagen alpha-1(XII) chain OS=Gallus gallus GN=COL12A1 PE=4 SV=2	1438	339594	44.5	10714	1	1	1	7663949	0
1	1	2::F1NX22_CHICK	Collagen alpha-1(XII) chain OS=Gallus gallus GN=COL12A1 PE=4 SV=2	1438	339594	44.5	10852	1	1	1	7759177	0
1	1	2::F1NX22_CHICK	Collagen alpha-1(XII) chain OS=Gallus gallus GN=COL12A1 PE=4 SV=2	1438	339594	44.5	10853	1	1	1	7759178	0
1	1	2::F1NX22_CHICK	Collagen alpha-1(XII) chain OS=Gallus gallus GN=COL12A1 PE=4 SV=2	1438	339594	44.5	10854	1	1	1	5176145	0
1	1	2::F1NX22_CHICK	Collagen alpha-1(XII) chain OS=Gallus gallus GN=COL12A1 PE=4 SV=2	1438	339594	44.5	10999	1	1	1	5229467	0
1	1	2::F1NX22_CHICK	Collagen alpha-1(XII) chain OS=Gallus gallus GN=COL12A1 PE=4 SV=2	1438	339594	44.5	11013	1	1	1	7848868	0
1	1	2::F1NX22_CHICK	Collagen alpha-1(XII) chain OS=Gallus gallus GN=COL12A1 PE=4 SV=2	1438	339594	44.5	11014	1	1	1	5235941	0
1	1	2::F1NX22_CHICK	Collagen alpha-1(XII) chain OS=Gallus gallus GN=COL12A1 PE=4 SV=2	1438	339594	44.5	11015	1	1	1	5235941	0
1	1	2::F1NX22_CHICK	Collagen alpha-1(XII) chain OS=Gallus gallus GN=COL12A1 PE=4 SV=2	1438	339594	44.5	11016	1	1	1	7848880	0
1	1	2::F1NX22_CHICK	Collagen alpha-1(XII) chain OS=Gallus gallus GN=COL12A1 PE=4 SV=2	1438	339594	44.5	11047	1	1	1	7873752	0
1	1	2::F1NX22_CHICK	Collagen alpha-1(XII) chain OS=Gallus gallus GN=COL12A1 PE=4 SV=2	1438	339594	44.5	11048	1	1	1	5252528	0
1	1	2::F1NX22_CHICK	Collagen alpha-1(XII) chain OS=Gallus gallus GN=COL12A1 PE=4 SV=2	1438	339594	44.5	11049	1	1	1	5252532	0
1	1	2::F1NX22_CHICK	Collagen alpha-1(XII) chain OS=Gallus gallus GN=COL12A1 PE=4 SV=2	1438	339594	44.5	11069	1	1	1	7884423	1
1	1	2::F1NX22_CHICK	Collagen alpha-1(XII) chain OS=Gallus gallus GN=COL12A1 PE=4 SV=2	1438	339594	44.5	11070	1	1	1	5259641	1
1	1	2::F1NX22_CHICK	Collagen alpha-1(XII) chain OS=Gallus gallus GN=COL12A1 PE=4 SV=2	1438	339594	44.5	11071	1	1	1	5259648	1
1	1	2::F1NX22_CHICK	Collagen alpha-1(XII) chain OS=Gallus gallus GN=COL12A1 PE=4 SV=2	1438	339594	44.5	11084	1	1	1	7908778	0
1	1	2::F1NX22_CHICK	Collagen alpha-1(XII) chain OS=Gallus gallus GN=COL12A1 PE=4 SV=2	1438	339594	44.5	11085	1	1	1	5275878	0
1	1	2::F1NX22_CHICK	Collagen alpha-1(XII) chain OS=Gallus gallus GN=COL12A1 PE=4 SV=2	1438	339594	44.5	11088	1	1	1	7913808	0
1	1	2::F1NX22_CHICK	Collagen alpha-1(XII) chain OS=Gallus gallus GN=COL12A1 PE=4 SV=2	1438	339594	44.5	11089	1	1	1	5279254	0
1	1	2::F1NX22_CHICK	Collagen alpha-1(XII) chain OS=Gallus gallus GN=COL12A1 PE=4 SV=2	1438	339594	44.5	11090	1	1	1	7913845	0
1	1	2::F1NX22_CHICK	Collagen alpha-1(XII) chain OS=Gallus gallus GN=COL12A1 PE=4 SV=2	1438	339594	44.5	11091	1	1	1	5279257	0
1	1	2::F1NX22_CHICK	Collagen alpha-1(XII) chain OS=Gallus gallus GN=COL12A1 PE=4 SV=2	1438	339594	44.5	11295	1	1	1	5346233	0
1	1	2::F1NX22_CHICK	Collagen alpha-1(XII) chain OS=Gallus gallus GN=COL12A1 PE=4 SV=2	1438	339594	44.5	11296	1	1	1	8014314	0
1	1	2::F1NX22_CHICK	Collagen alpha-1(XII) chain OS=Gallus gallus GN=COL12A1 PE=4 SV=2	1438	339594	44.5	11298	1	1	1	5346240	0
1	1	2::F1NX22_CHICK	Collagen alpha-1(XII) chain OS=Gallus gallus GN=COL12A1 PE=4 SV=2	1438	339594	44.5	11464	1	1	1	8129039	0
1	1	2::F1NX22_CHICK	Collagen alpha-1(XII) chain OS=Gallus gallus GN=COL12A1 PE=4 SV=2	1438	339594	44.5	11465	1	1	1	8129039	0
1	1	2::F1NX22_CHICK	Collagen alpha-1(XII) chain OS=Gallus gallus GN=COL12A1 PE=4 SV=2	1438	339594	44.5	11466	1	1	1	5422722	0
1	1	2::F1NX22_CHICK	Collagen alpha-1(XII) chain OS=Gallus gallus GN=COL12A1 PE=4 SV=2	1438	339594	44.5	11758	1	1	1	5579712	1
1	1	2::F1NX22_CHICK	Collagen alpha-1(XII) chain OS=Gallus gallus GN=COL12A1 PE=4 SV=2	1438	339594	44.5	11788	1	1	1	8399452	0
1	1	2::F1NX22_CHICK	Collagen alpha-1(XII) chain OS=Gallus gallus GN=COL12A1 PE=4 SV=2	1438	339594	44.5	11789	1	1	1	5602997	0
1	1	2::F1NX22_CHICK	Collagen alpha-1(XII) chain OS=Gallus gallus GN=COL12A1 PE=4 SV=2	1438	339594	44.5	11790	1	1	1	5603004	0
1	1	2::F1NX22_CHICK	Collagen alpha-1(XII) chain OS=Gallus gallus GN=COL12A1 PE=4 SV=2	1438	339594	44.5	11791	1	1	1	8399471	0
1	1	2::F1NX22_CHICK	Collagen alpha-1(XII) chain OS=Gallus gallus GN=COL12A1 PE=4 SV=2	1438	339594	44.5	11881	1	1	1	5646546	0
1	1	2::F1NX22_CHICK	Collagen alpha-1(XII) chain OS=Gallus gallus GN=COL12A1 PE=4 SV=2	1438	339594	44.5	12031	1	1	1	5702856	1
1	1	2::F1NX22_CHICK	Collagen alpha-1(XII) chain OS=Gallus gallus GN=COL12A1 PE=4 SV=2	1438	339594	44.5	12032	1	1	1	8549248	1
1	1	2::F1NX22_CHICK	Collagen alpha-1(XII) chain OS=Gallus gallus GN=COL12A1 PE=4 SV=2	1438	339594	44.5	12049	1	1	1	8554610	0
1	1	2::F1NX22_CHICK	Collagen alpha-1(XII) chain OS=Gallus gallus GN=COL12A1 PE=4 SV=2	1438	339594	44.5	12050	1	1	1	5706433	0
1	1	2::F1NX22_CHICK	Collagen alpha-1(XII) chain OS=Gallus gallus GN=COL12A1 PE=4 SV=2	1438	339594	44.5	12051	1	1	1	8554613	0
1	1	2::F1NX22_CHICK	Collagen alpha-1(XII) chain OS=Gallus gallus GN=COL12A1 PE=4 SV=2	1438	339594	44.5	12052	1	1	1	5706435	0
1	1	2::F1NX22_CHICK	Collagen alpha-1(XII) chain OS=Gallus gallus GN=COL12A1 PE=4 SV=2	1438	339594	44.5	12158	1	1	1	8624396	0
1	1	2::F1NX22_CHICK	Collagen alpha-1(XII) chain OS=Gallus gallus GN=COL12A1 PE=4 SV=2	1438	339594	44.5	12159	1	1	1	8624401	0
1	1	2::F1NX22_CHICK	Collagen alpha-1(XII) chain OS=Gallus gallus GN=COL12A1 PE=4 SV=2	1438	339594	44.5	12160	1	1	1	5752959	0
1	1	2::F1NX22_CHICK	Collagen alpha-1(XII) chain OS=Gallus gallus GN=COL12A1 PE=4 SV=2	1438	339594	44.5	12161	1	1	1	5752963	0
1	1	2::F1NX22_CHICK	Collagen alpha-1(XII) chain OS=Gallus gallus GN=COL12A1 PE=4 SV=2	1438	339594	44.5	12215	1	1	1	5773102	0
1	1	2::F1NX22_CHICK	Collagen alpha-1(XII) chain OS=Gallus gallus GN=COL12A1 PE=4 SV=2	1438	339594	44.5	12216	1	1	1	8654617	0
1	1	2::F1NX22_CHICK	Collagen alpha-1(XII) chain OS=Gallus gallus GN=COL12A1 PE=4 SV=2	1438	339594	44.5	12217	1	1	1	5773110	0
1	1	2::F1NX22_CHICK	Collagen alpha-1(XII) chain OS=Gallus gallus GN=COL12A1 PE=4 SV=2	1438	339594	44.5	12218	1	1	1	8654649	0
1	1	2::F1NX22_CHICK	Collagen alpha-1(XII) chain OS=Gallus gallus GN=COL12A1 PE=4 SV=2	1438	339594	44.5	12221	1	1	1	8659529	0
1	1	2::F1NX22_CHICK	Collagen alpha-1(XII) chain OS=Gallus gallus GN=COL12A1 PE=4 SV=2	1438	339594	44.5	12222	1	1	1	5776387	0
1	1	2::F1NX22_CHICK	Collagen alpha-1(XII) chain OS=Gallus gallus GN=COL12A1 PE=4 SV=2	1438	339594	44.5	12935	1	1	1	6186552	0
1	1	2::F1NX22_CHICK	Collagen alpha-1(XII) chain OS=Gallus gallus GN=COL12A1 PE=4 SV=2	1438	339594	44.5	12936	1	1	1	9274795	0
1	1	2::F1NX22_CHICK	Collagen alpha-1(XII) chain OS=Gallus gallus GN=COL12A1 PE=4 SV=2	1438	339594	44.5	12937	1	1	1	6186559	0
1	1	2::F1NX22_CHICK	Collagen alpha-1(XII) chain OS=Gallus gallus GN=COL12A1 PE=4 SV=2	1438	339594	44.5	12938	1	1	1	9274808	0
1	1	2::F1NX22_CHICK	Collagen alpha-1(XII) chain OS=Gallus gallus GN=COL12A1 PE=4 SV=2	1438	339594	44.5	12979	1	1	1	6233071	0
1	1	2::F1NX22_CHICK	Collagen alpha-1(XII) chain OS=Gallus gallus GN=COL12A1 PE=4 SV=2	1438	339594	44.5	13139	1	1	1	9519796	0
1	1	2::F1NX22_CHICK	Collagen alpha-1(XII) chain OS=Gallus gallus GN=COL12A1 PE=4 SV=2	1438	339594	44.5	13140	1	1	1	6349889	0
1	1	2::F1NX22_CHICK	Collagen alpha-1(XII) chain OS=Gallus gallus GN=COL12A1 PE=4 SV=2	1438	339594	44.5	13141	1	1	1	9519803	0
1	1	2::F1NX22_CHICK	Collagen alpha-1(XII) chain OS=Gallus gallus GN=COL12A1 PE=4 SV=2	1438	339594	44.5	13142	1	1	1	6349900	0
1	1	2::F1NX22_CHICK	Collagen alpha-1(XII) chain OS=Gallus gallus GN=COL12A1 PE=4 SV=2	1438	339594	44.5	13619	1	1	1	6706897	1
1	1	2::F1NX22_CHICK	Collagen alpha-1(XII) chain OS=Gallus gallus GN=COL12A1 PE=4 SV=2	1438	339594	44.5	13637	1	1	1	6729808	0
1	1	2::F1NX22_CHICK	Collagen alpha-1(XII) chain OS=Gallus gallus GN=COL12A1 PE=4 SV=2	1438	339594	44.5	13652	1	1	1	6743379	0
1	1	2::F1NX22_CHICK	Collagen alpha-1(XII) chain OS=Gallus gallus GN=COL12A1 PE=4 SV=2	1438	339594	44.5	13653	1	1	1	6743380	0
1	1	2::F1NX22_CHICK	Collagen alpha-1(XII) chain OS=Gallus gallus GN=COL12A1 PE=4 SV=2	1438	339594	44.5	13654	1	1	1	10110036	0
1	1	2::F1NX22_CHICK	Collagen alpha-1(XII) chain OS=Gallus gallus GN=COL12A1 PE=4 SV=2	1438	339594	44.5	13655	1	1	1	10110045	0
1	1	2::F1NX22_CHICK	Collagen alpha-1(XII) chain OS=Gallus gallus GN=COL12A1 PE=4 SV=2	1438	339594	44.5	13656	1	1	1	6746654	0
1	1	2::F1NX22_CHICK	Collagen alpha-1(XII) chain OS=Gallus gallus GN=COL12A1 PE=4 SV=2	1438	339594	44.5	13657	1	1	1	10114951	0
1	1	2::F1NX22_CHICK	Collagen alpha-1(XII) chain OS=Gallus gallus GN=COL12A1 PE=4 SV=2	1438	339594	44.5	13658	1	1	1	6746659	0
1	1	2::F1NX22_CHICK	Collagen alpha-1(XII) chain OS=Gallus gallus GN=COL12A1 PE=4 SV=2	1438	339594	44.5	13659	1	1	1	10114956	0
1	1	2::F1NX22_CHICK	Collagen alpha-1(XII) chain OS=Gallus gallus GN=COL12A1 PE=4 SV=2	1438	339594	44.5	13923	1	1	1	10500453	0
1	1	2::F1NX22_CHICK	Collagen alpha-1(XII) chain OS=Gallus gallus GN=COL12A1 PE=4 SV=2	1438	339594	44.5	13924	1	1	1	10500470	0
1	1	2::F1NX22_CHICK	Collagen alpha-1(XII) chain OS=Gallus gallus GN=COL12A1 PE=4 SV=2	1438	339594	44.5	13925	1	1	1	7003674	0
1	1	2::F1NX22_CHICK	Collagen alpha-1(XII) chain OS=Gallus gallus GN=COL12A1 PE=4 SV=2	1438	339594	44.5	13926	1	1	1	10500477	0
1	1	2::F1NX22_CHICK	Collagen alpha-1(XII) chain OS=Gallus gallus GN=COL12A1 PE=4 SV=2	1438	339594	44.5	13927	1	1	1	7003676	0
1	1	2::F1NX22_CHICK	Collagen alpha-1(XII) chain OS=Gallus gallus GN=COL12A1 PE=4 SV=2	1438	339594	44.5	13928	1	1	1	7003687	0
1	1	2::F1NX22_CHICK	Collagen alpha-1(XII) chain OS=Gallus gallus GN=COL12A1 PE=4 SV=2	1438	339594	44.5	14060	1	1	1	7113548	0
1	1	2::F1NX22_CHICK	Collagen alpha-1(XII) chain OS=Gallus gallus GN=COL12A1 PE=4 SV=2	1438	339594	44.5	14062	1	1	1	7113552	0
1	1	2::F1NX22_CHICK	Collagen alpha-1(XII) chain OS=Gallus gallus GN=COL12A1 PE=4 SV=2	1438	339594	44.5	14064	1	1	1	10665297	0
1	1	2::F1NX22_CHICK	Collagen alpha-1(XII) chain OS=Gallus gallus GN=COL12A1 PE=4 SV=2	1438	339594	44.5	14071	1	1	1	7116828	0
1	1	2::F1NX22_CHICK	Collagen alpha-1(XII) chain OS=Gallus gallus GN=COL12A1 PE=4 SV=2	1438	339594	44.5	14072	1	1	1	7116830	0
1	1	2::F1NX22_CHICK	Collagen alpha-1(XII) chain OS=Gallus gallus GN=COL12A1 PE=4 SV=2	1438	339594	44.5	14073	1	1	1	10670219	0
1	1	2::F1NX22_CHICK	Collagen alpha-1(XII) chain OS=Gallus gallus GN=COL12A1 PE=4 SV=2	1438	339594	44.5	14380	1	1	1	7394000	0
1	1	2::F1NX22_CHICK	Collagen alpha-1(XII) chain OS=Gallus gallus GN=COL12A1 PE=4 SV=2	1438	339594	44.5	14381	1	1	1	7394004	0
1	1	2::F1NX22_CHICK	Collagen alpha-1(XII) chain OS=Gallus gallus GN=COL12A1 PE=4 SV=2	1438	339594	44.5	14382	1	1	1	11085974	0
1	1	2::F1NX22_CHICK	Collagen alpha-1(XII) chain OS=Gallus gallus GN=COL12A1 PE=4 SV=2	1438	339594	44.5	14383	1	1	1	7394008	0
1	1	2::F1NX22_CHICK	Collagen alpha-1(XII) chain OS=Gallus gallus GN=COL12A1 PE=4 SV=2	1438	339594	44.5	14384	1	1	1	11085977	0
1	1	2::F1NX22_CHICK	Collagen alpha-1(XII) chain OS=Gallus gallus GN=COL12A1 PE=4 SV=2	1438	339594	44.5	14386	1	1	1	11090974	0
1	1	2::F1NX22_CHICK	Collagen alpha-1(XII) chain OS=Gallus gallus GN=COL12A1 PE=4 SV=2	1438	339594	44.5	14406	1	1	1	11145312	0
1	1	2::F1NX22_CHICK	Collagen alpha-1(XII) chain OS=Gallus gallus GN=COL12A1 PE=4 SV=2	1438	339594	44.5	14407	1	1	1	7433569	0
1	1	2::F1NX22_CHICK	Collagen alpha-1(XII) chain OS=Gallus gallus GN=COL12A1 PE=4 SV=2	1438	339594	44.5	14408	1	1	1	7433571	0
1	1	2::F1NX22_CHICK	Collagen alpha-1(XII) chain OS=Gallus gallus GN=COL12A1 PE=4 SV=2	1438	339594	44.5	14409	1	1	1	11145328	0
1	1	2::F1NX22_CHICK	Collagen alpha-1(XII) chain OS=Gallus gallus GN=COL12A1 PE=4 SV=2	1438	339594	44.5	14589	1	1	1	7603967	0
1	1	2::F1NX22_CHICK	Collagen alpha-1(XII) chain OS=Gallus gallus GN=COL12A1 PE=4 SV=2	1438	339594	44.5	14591	1	1	1	7603971	0
1	1	2::F1NX22_CHICK	Collagen alpha-1(XII) chain OS=Gallus gallus GN=COL12A1 PE=4 SV=2	1438	339594	44.5	14592	1	1	1	7603975	0
1	1	2::F1NX22_CHICK	Collagen alpha-1(XII) chain OS=Gallus gallus GN=COL12A1 PE=4 SV=2	1438	339594	44.5	14593	1	1	1	7603976	0
1	1	2::F1NX22_CHICK	Collagen alpha-1(XII) chain OS=Gallus gallus GN=COL12A1 PE=4 SV=2	1438	339594	44.5	14594	1	1	1	7603976	0
1	1	2::F1NX22_CHICK	Collagen alpha-1(XII) chain OS=Gallus gallus GN=COL12A1 PE=4 SV=2	1438	339594	44.5	14595	1	1	1	7603980	0
1	1	2::F1NX22_CHICK	Collagen alpha-1(XII) chain OS=Gallus gallus GN=COL12A1 PE=4 SV=2	1438	339594	44.5	14596	1	1	1	11400934	0
1	1	2::F1NX22_CHICK	Collagen alpha-1(XII) chain OS=Gallus gallus GN=COL12A1 PE=4 SV=2	1438	339594	44.5	14597	1	1	1	11400935	0
1	1	2::F1NX22_CHICK	Collagen alpha-1(XII) chain OS=Gallus gallus GN=COL12A1 PE=4 SV=2	1438	339594	44.5	14653	1	1	1	7694032	0
1	1	2::F1NX22_CHICK	Collagen alpha-1(XII) chain OS=Gallus gallus GN=COL12A1 PE=4 SV=2	1438	339594	44.5	14654	1	1	1	7694037	0
1	1	2::F1NX22_CHICK	Collagen alpha-1(XII) chain OS=Gallus gallus GN=COL12A1 PE=4 SV=2	1438	339594	44.5	14656	1	1	1	11536026	0
1	1	2::F1NX22_CHICK	Collagen alpha-1(XII) chain OS=Gallus gallus GN=COL12A1 PE=4 SV=2	1438	339594	44.5	14657	1	1	1	11536029	0
1	1	2::F1NX22_CHICK	Collagen alpha-1(XII) chain OS=Gallus gallus GN=COL12A1 PE=4 SV=2	1438	339594	44.5	14698	1	1	1	7766997	0
1	1	2::F1NX22_CHICK	Collagen alpha-1(XII) chain OS=Gallus gallus GN=COL12A1 PE=4 SV=2	1438	339594	44.5	14699	1	1	1	7767003	0
1	1	2::F1NX22_CHICK	Collagen alpha-1(XII) chain OS=Gallus gallus GN=COL12A1 PE=4 SV=2	1438	339594	44.5	14700	1	1	1	11645470	0
1	1	2::F1NX22_CHICK	Collagen alpha-1(XII) chain OS=Gallus gallus GN=COL12A1 PE=4 SV=2	1438	339594	44.5	14706	1	1	1	7773843	0
1	1	2::F1NX22_CHICK	Collagen alpha-1(XII) chain OS=Gallus gallus GN=COL12A1 PE=4 SV=2	1438	339594	44.5	14841	1	1	1	5977975	0
1	1	2::F1NX22_CHICK	Collagen alpha-1(XII) chain OS=Gallus gallus GN=COL12A1 PE=4 SV=2	1438	339594	44.5	14842	1	1	1	7967281	0
1	1	2::F1NX22_CHICK	Collagen alpha-1(XII) chain OS=Gallus gallus GN=COL12A1 PE=4 SV=2	1438	339594	44.5	14843	1	1	1	7967285	0
1	1	2::F1NX22_CHICK	Collagen alpha-1(XII) chain OS=Gallus gallus GN=COL12A1 PE=4 SV=2	1438	339594	44.5	14848	1	1	1	7970749	0
1	1	2::F1NX22_CHICK	Collagen alpha-1(XII) chain OS=Gallus gallus GN=COL12A1 PE=4 SV=2	1438	339594	44.5	14849	1	1	1	11951100	0
1	1	2::F1NX22_CHICK	Collagen alpha-1(XII) chain OS=Gallus gallus GN=COL12A1 PE=4 SV=2	1438	339594	44.5	14850	1	1	1	7970764	0
1	1	2::F1NX22_CHICK	Collagen alpha-1(XII) chain OS=Gallus gallus GN=COL12A1 PE=4 SV=2	1438	339594	44.5	14934	1	1	1	12161142	0
1	1	2::F1NX22_CHICK	Collagen alpha-1(XII) chain OS=Gallus gallus GN=COL12A1 PE=4 SV=2	1438	339594	44.5	14935	1	1	1	8110794	0
1	1	2::F1NX22_CHICK	Collagen alpha-1(XII) chain OS=Gallus gallus GN=COL12A1 PE=4 SV=2	1438	339594	44.5	15398	1	1	1	9154493	0
1	1	2::F1NX22_CHICK	Collagen alpha-1(XII) chain OS=Gallus gallus GN=COL12A1 PE=4 SV=2	1438	339594	44.5	15399	1	1	1	9154494	0
1	1	2::F1NX22_CHICK	Collagen alpha-1(XII) chain OS=Gallus gallus GN=COL12A1 PE=4 SV=2	1438	339594	44.5	15400	1	1	1	13726719	0
1	1	2::F1NX22_CHICK	Collagen alpha-1(XII) chain OS=Gallus gallus GN=COL12A1 PE=4 SV=2	1438	339594	44.5	15456	1	1	1	6988298	0
1	1	2::F1NX22_CHICK	Collagen alpha-1(XII) chain OS=Gallus gallus GN=COL12A1 PE=4 SV=2	1438	339594	44.5	15457	1	1	1	9314375	0
1	1	2::F1NX22_CHICK	Collagen alpha-1(XII) chain OS=Gallus gallus GN=COL12A1 PE=4 SV=2	1438	339594	44.5	15458	1	1	1	9314381	0
1	1	2::F1NX22_CHICK	Collagen alpha-1(XII) chain OS=Gallus gallus GN=COL12A1 PE=4 SV=2	1438	339594	44.5	15459	1	1	1	6988304	0
1	1	2::F1NX22_CHICK	Collagen alpha-1(XII) chain OS=Gallus gallus GN=COL12A1 PE=4 SV=2	1438	339594	44.5	15513	1	1	1	7148651	0
1	1	2::F1NX22_CHICK	Collagen alpha-1(XII) chain OS=Gallus gallus GN=COL12A1 PE=4 SV=2	1438	339594	44.5	15514	1	1	1	9528188	0
1	1	2::F1NX22_CHICK	Collagen alpha-1(XII) chain OS=Gallus gallus GN=COL12A1 PE=4 SV=2	1438	339594	44.5	15515	1	1	1	9528196	0
1	1	2::F1NX22_CHICK	Collagen alpha-1(XII) chain OS=Gallus gallus GN=COL12A1 PE=4 SV=2	1438	339594	44.5	15516	1	1	1	7148667	0
1	1	2::F1NX22_CHICK	Collagen alpha-1(XII) chain OS=Gallus gallus GN=COL12A1 PE=4 SV=2	1438	339594	44.5	15595	1	1	1	7308743	0
1	1	2::F1NX22_CHICK	Collagen alpha-1(XII) chain OS=Gallus gallus GN=COL12A1 PE=4 SV=2	1438	339594	44.5	15596	1	1	1	9741637	0
1	1	2::F1NX22_CHICK	Collagen alpha-1(XII) chain OS=Gallus gallus GN=COL12A1 PE=4 SV=2	1438	339594	44.5	15597	1	1	1	9741640	0
1	1	2::F1NX22_CHICK	Collagen alpha-1(XII) chain OS=Gallus gallus GN=COL12A1 PE=4 SV=2	1438	339594	44.5	15598	1	1	1	14607446	0
1	1	2::F1NX22_CHICK	Collagen alpha-1(XII) chain OS=Gallus gallus GN=COL12A1 PE=4 SV=2	1438	339594	44.5	15599	1	1	1	9744831	0
1	1	2::F1NX22_CHICK	Collagen alpha-1(XII) chain OS=Gallus gallus GN=COL12A1 PE=4 SV=2	1438	339594	44.5	15600	1	1	1	9744834	0
1	1	2::F1NX22_CHICK	Collagen alpha-1(XII) chain OS=Gallus gallus GN=COL12A1 PE=4 SV=2	1438	339594	44.5	15601	1	1	1	7311146	0
1	1	2::F1NX22_CHICK	Collagen alpha-1(XII) chain OS=Gallus gallus GN=COL12A1 PE=4 SV=2	1438	339594	44.5	15602	1	1	1	9744840	0
1	1	2::F1NX22_CHICK	Collagen alpha-1(XII) chain OS=Gallus gallus GN=COL12A1 PE=4 SV=2	1438	339594	44.5	15603	1	1	1	7311156	0
1	1	2::F1NX22_CHICK	Collagen alpha-1(XII) chain OS=Gallus gallus GN=COL12A1 PE=4 SV=2	1438	339594	44.5	15618	1	1	1	7348555	0
1	1	2::F1NX22_CHICK	Collagen alpha-1(XII) chain OS=Gallus gallus GN=COL12A1 PE=4 SV=2	1438	339594	44.5	15619	1	1	1	7348561	0
1	1	2::F1NX22_CHICK	Collagen alpha-1(XII) chain OS=Gallus gallus GN=COL12A1 PE=4 SV=2	1438	339594	44.5	15620	1	1	1	9794726	0
1	1	2::F1NX22_CHICK	Collagen alpha-1(XII) chain OS=Gallus gallus GN=COL12A1 PE=4 SV=2	1438	339594	44.5	15621	1	1	1	9794728	0
1	1	2::F1NX22_CHICK	Collagen alpha-1(XII) chain OS=Gallus gallus GN=COL12A1 PE=4 SV=2	1438	339594	44.5	15622	1	1	1	9794729	0
1	1	2::F1NX22_CHICK	Collagen alpha-1(XII) chain OS=Gallus gallus GN=COL12A1 PE=4 SV=2	1438	339594	44.5	15649	1	1	1	15037964	0
1	1	2::F1NX22_CHICK	Collagen alpha-1(XII) chain OS=Gallus gallus GN=COL12A1 PE=4 SV=2	1438	339594	44.5	15650	1	1	1	7524019	0
1	1	2::F1NX22_CHICK	Collagen alpha-1(XII) chain OS=Gallus gallus GN=COL12A1 PE=4 SV=2	1438	339594	44.5	15651	1	1	1	10028670	0
1	1	2::F1NX22_CHICK	Collagen alpha-1(XII) chain OS=Gallus gallus GN=COL12A1 PE=4 SV=2	1438	339594	44.5	15652	1	1	1	7524021	0
1	1	2::F1NX22_CHICK	Collagen alpha-1(XII) chain OS=Gallus gallus GN=COL12A1 PE=4 SV=2	1438	339594	44.5	15653	1	1	1	10028674	0
1	1	2::F1NX22_CHICK	Collagen alpha-1(XII) chain OS=Gallus gallus GN=COL12A1 PE=4 SV=2	1438	339594	44.5	15669	1	1	1	10138398	0
1	1	2::F1NX22_CHICK	Collagen alpha-1(XII) chain OS=Gallus gallus GN=COL12A1 PE=4 SV=2	1438	339594	44.5	15897	1	1	1	12269175	0	emPAI	0.80
2	1	2::F1P2F0_CHICK	Collagen alpha-3(VI) chain OS=Gallus gallus GN=COL6A3 PE=4 SV=1	1178	339408	42.6	1297	4	1	1	2651587	0
2	1	2::F1P2F0_CHICK	Collagen alpha-3(VI) chain OS=Gallus gallus GN=COL6A3 PE=4 SV=1	1178	339408	42.6	1298	4	1	1	2651588	0
2	1	2::F1P2F0_CHICK	Collagen alpha-3(VI) chain OS=Gallus gallus GN=COL6A3 PE=4 SV=1	1178	339408	42.6	2061	1	1	1	2901486	0
2	1	2::F1P2F0_CHICK	Collagen alpha-3(VI) chain OS=Gallus gallus GN=COL6A3 PE=4 SV=1	1178	339408	42.6	2062	1	1	1	2901490	0
2	1	2::F1P2F0_CHICK	Collagen alpha-3(VI) chain OS=Gallus gallus GN=COL6A3 PE=4 SV=1	1178	339408	42.6	2316	1	1	1	3077033	0
2	1	2::F1P2F0_CHICK	Collagen alpha-3(VI) chain OS=Gallus gallus GN=COL6A3 PE=4 SV=1	1178	339408	42.6	2685	2	1	1	3261769	0
2	1	2::F1P2F0_CHICK	Collagen alpha-3(VI) chain OS=Gallus gallus GN=COL6A3 PE=4 SV=1	1178	339408	42.6	2745	3	1	1	3292058	0
2	1	2::F1P2F0_CHICK	Collagen alpha-3(VI) chain OS=Gallus gallus GN=COL6A3 PE=4 SV=1	1178	339408	42.6	2746	1	1	1	3292061	0
2	1	2::F1P2F0_CHICK	Collagen alpha-3(VI) chain OS=Gallus gallus GN=COL6A3 PE=4 SV=1	1178	339408	42.6	2937	1	1	1	3377162	0
2	1	2::F1P2F0_CHICK	Collagen alpha-3(VI) chain OS=Gallus gallus GN=COL6A3 PE=4 SV=1	1178	339408	42.6	2938	1	1	1	3377163	0
2	1	2::F1P2F0_CHICK	Collagen alpha-3(VI) chain OS=Gallus gallus GN=COL6A3 PE=4 SV=1	1178	339408	42.6	3437	1	1	1	3601699	0
2	1	2::F1P2F0_CHICK	Collagen alpha-3(VI) chain OS=Gallus gallus GN=COL6A3 PE=4 SV=1	1178	339408	42.6	3541	1	1	1	3652297	0
2	1	2::F1P2F0_CHICK	Collagen alpha-3(VI) chain OS=Gallus gallus GN=COL6A3 PE=4 SV=1	1178	339408	42.6	3542	1	1	1	3652298	0
2	1	2::F1P2F0_CHICK	Collagen alpha-3(VI) chain OS=Gallus gallus GN=COL6A3 PE=4 SV=1	1178	339408	42.6	3556	1	1	1	3662064	0
2	1	2::F1P2F0_CHICK	Collagen alpha-3(VI) chain OS=Gallus gallus GN=COL6A3 PE=4 SV=1	1178	339408	42.6	3579	1	1	1	3671961	0
2	1	2::F1P2F0_CHICK	Collagen alpha-3(VI) chain OS=Gallus gallus GN=COL6A3 PE=4 SV=1	1178	339408	42.6	3580	1	1	1	3671967	0
2	1	2::F1P2F0_CHICK	Collagen alpha-3(VI) chain OS=Gallus gallus GN=COL6A3 PE=4 SV=1	1178	339408	42.6	3581	1	1	1	3671974	0
2	1	2::F1P2F0_CHICK	Collagen alpha-3(VI) chain OS=Gallus gallus GN=COL6A3 PE=4 SV=1	1178	339408	42.6	3716	1	1	1	3731837	0
2	1	2::F1P2F0_CHICK	Collagen alpha-3(VI) chain OS=Gallus gallus GN=COL6A3 PE=4 SV=1	1178	339408	42.6	3751	3	1	1	3742074	0
2	1	2::F1P2F0_CHICK	Collagen alpha-3(VI) chain OS=Gallus gallus GN=COL6A3 PE=4 SV=1	1178	339408	42.6	4255	2	1	1	4007355	0
2	1	2::F1P2F0_CHICK	Collagen alpha-3(VI) chain OS=Gallus gallus GN=COL6A3 PE=4 SV=1	1178	339408	42.6	4276	6	1	1	4017251	0
2	1	2::F1P2F0_CHICK	Collagen alpha-3(VI) chain OS=Gallus gallus GN=COL6A3 PE=4 SV=1	1178	339408	42.6	4328	1	1	1	4042352	0
2	1	2::F1P2F0_CHICK	Collagen alpha-3(VI) chain OS=Gallus gallus GN=COL6A3 PE=4 SV=1	1178	339408	42.6	4360	2	1	1	2711769	0
2	1	2::F1P2F0_CHICK	Collagen alpha-3(VI) chain OS=Gallus gallus GN=COL6A3 PE=4 SV=1	1178	339408	42.6	4529	1	1	1	4157225	0
2	1	2::F1P2F0_CHICK	Collagen alpha-3(VI) chain OS=Gallus gallus GN=COL6A3 PE=4 SV=1	1178	339408	42.6	4530	1	1	1	4157228	0
2	1	2::F1P2F0_CHICK	Collagen alpha-3(VI) chain OS=Gallus gallus GN=COL6A3 PE=4 SV=1	1178	339408	42.6	4531	1	1	1	4157347	0
2	1	2::F1P2F0_CHICK	Collagen alpha-3(VI) chain OS=Gallus gallus GN=COL6A3 PE=4 SV=1	1178	339408	42.6	4532	1	1	1	4157352	0
2	1	2::F1P2F0_CHICK	Collagen alpha-3(VI) chain OS=Gallus gallus GN=COL6A3 PE=4 SV=1	1178	339408	42.6	4533	1	1	1	4157355	0
2	1	2::F1P2F0_CHICK	Collagen alpha-3(VI) chain OS=Gallus gallus GN=COL6A3 PE=4 SV=1	1178	339408	42.6	4653	1	1	1	4227484	0
2	1	2::F1P2F0_CHICK	Collagen alpha-3(VI) chain OS=Gallus gallus GN=COL6A3 PE=4 SV=1	1178	339408	42.6	4654	1	1	1	4227484	0
2	1	2::F1P2F0_CHICK	Collagen alpha-3(VI) chain OS=Gallus gallus GN=COL6A3 PE=4 SV=1	1178	339408	42.6	4964	1	1	1	2901595	0
2	1	2::F1P2F0_CHICK	Collagen alpha-3(VI) chain OS=Gallus gallus GN=COL6A3 PE=4 SV=1	1178	339408	42.6	4965	1	1	1	2901600	0
2	1	2::F1P2F0_CHICK	Collagen alpha-3(VI) chain OS=Gallus gallus GN=COL6A3 PE=4 SV=1	1178	339408	42.6	5138	1	1	1	4372257	0
2	1	2::F1P2F0_CHICK	Collagen alpha-3(VI) chain OS=Gallus gallus GN=COL6A3 PE=4 SV=1	1178	339408	42.6	5139	1	1	1	4372258	0
2	1	2::F1P2F0_CHICK	Collagen alpha-3(VI) chain OS=Gallus gallus GN=COL6A3 PE=4 SV=1	1178	339408	42.6	5271	1	1	1	4427702	0
2	1	2::F1P2F0_CHICK	Collagen alpha-3(VI) chain OS=Gallus gallus GN=COL6A3 PE=4 SV=1	1178	339408	42.6	5370	3	1	1	4467308	0
2	1	2::F1P2F0_CHICK	Collagen alpha-3(VI) chain OS=Gallus gallus GN=COL6A3 PE=4 SV=1	1178	339408	42.6	5845	1	1	1	4643046	0
2	1	2::F1P2F0_CHICK	Collagen alpha-3(VI) chain OS=Gallus gallus GN=COL6A3 PE=4 SV=1	1178	339408	42.6	6444	1	1	1	4942780	0
2	1	2::F1P2F0_CHICK	Collagen alpha-3(VI) chain OS=Gallus gallus GN=COL6A3 PE=4 SV=1	1178	339408	42.6	6445	1	1	1	4942781	0
2	1	2::F1P2F0_CHICK	Collagen alpha-3(VI) chain OS=Gallus gallus GN=COL6A3 PE=4 SV=1	1178	339408	42.6	6940	1	1	1	5237732	0
2	1	2::F1P2F0_CHICK	Collagen alpha-3(VI) chain OS=Gallus gallus GN=COL6A3 PE=4 SV=1	1178	339408	42.6	6941	1	1	1	5237733	0
2	1	2::F1P2F0_CHICK	Collagen alpha-3(VI) chain OS=Gallus gallus GN=COL6A3 PE=4 SV=1	1178	339408	42.6	7096	1	1	1	5347713	0
2	1	2::F1P2F0_CHICK	Collagen alpha-3(VI) chain OS=Gallus gallus GN=COL6A3 PE=4 SV=1	1178	339408	42.6	7251	1	1	1	5437839	0
2	1	2::F1P2F0_CHICK	Collagen alpha-3(VI) chain OS=Gallus gallus GN=COL6A3 PE=4 SV=1	1178	339408	42.6	7425	1	1	1	5537978	0
2	1	2::F1P2F0_CHICK	Collagen alpha-3(VI) chain OS=Gallus gallus GN=COL6A3 PE=4 SV=1	1178	339408	42.6	7473	1	1	1	5568296	0
2	1	2::F1P2F0_CHICK	Collagen alpha-3(VI) chain OS=Gallus gallus GN=COL6A3 PE=4 SV=1	1178	339408	42.6	7847	1	1	1	5783229	0
2	1	2::F1P2F0_CHICK	Collagen alpha-3(VI) chain OS=Gallus gallus GN=COL6A3 PE=4 SV=1	1178	339408	42.6	7848	1	1	1	5783237	0
2	1	2::F1P2F0_CHICK	Collagen alpha-3(VI) chain OS=Gallus gallus GN=COL6A3 PE=4 SV=1	1178	339408	42.6	8153	1	1	1	5958264	0
2	1	2::F1P2F0_CHICK	Collagen alpha-3(VI) chain OS=Gallus gallus GN=COL6A3 PE=4 SV=1	1178	339408	42.6	8155	1	1	1	5958285	0
2	1	2::F1P2F0_CHICK	Collagen alpha-3(VI) chain OS=Gallus gallus GN=COL6A3 PE=4 SV=1	1178	339408	42.6	8316	1	1	1	6058442	0
2	1	2::F1P2F0_CHICK	Collagen alpha-3(VI) chain OS=Gallus gallus GN=COL6A3 PE=4 SV=1	1178	339408	42.6	8317	1	1	1	6058442	0
2	1	2::F1P2F0_CHICK	Collagen alpha-3(VI) chain OS=Gallus gallus GN=COL6A3 PE=4 SV=1	1178	339408	42.6	8318	1	1	1	4042327	0
2	1	2::F1P2F0_CHICK	Collagen alpha-3(VI) chain OS=Gallus gallus GN=COL6A3 PE=4 SV=1	1178	339408	42.6	8322	1	1	1	6063090	0
2	1	2::F1P2F0_CHICK	Collagen alpha-3(VI) chain OS=Gallus gallus GN=COL6A3 PE=4 SV=1	1178	339408	42.6	8323	1	1	1	6063097	0
2	1	2::F1P2F0_CHICK	Collagen alpha-3(VI) chain OS=Gallus gallus GN=COL6A3 PE=4 SV=1	1178	339408	42.6	8463	1	1	1	6138135	0
2	1	2::F1P2F0_CHICK	Collagen alpha-3(VI) chain OS=Gallus gallus GN=COL6A3 PE=4 SV=1	1178	339408	42.6	8473	1	1	1	6143057	0
2	1	2::F1P2F0_CHICK	Collagen alpha-3(VI) chain OS=Gallus gallus GN=COL6A3 PE=4 SV=1	1178	339408	42.6	8622	1	1	1	6242946	0
2	1	2::F1P2F0_CHICK	Collagen alpha-3(VI) chain OS=Gallus gallus GN=COL6A3 PE=4 SV=1	1178	339408	42.6	8719	1	1	1	6308113	0
2	1	2::F1P2F0_CHICK	Collagen alpha-3(VI) chain OS=Gallus gallus GN=COL6A3 PE=4 SV=1	1178	339408	42.6	8889	1	1	1	6428058	0
2	1	2::F1P2F0_CHICK	Collagen alpha-3(VI) chain OS=Gallus gallus GN=COL6A3 PE=4 SV=1	1178	339408	42.6	8890	1	1	1	6428058	0
2	1	2::F1P2F0_CHICK	Collagen alpha-3(VI) chain OS=Gallus gallus GN=COL6A3 PE=4 SV=1	1178	339408	42.6	9141	1	1	1	6593636	0
2	1	2::F1P2F0_CHICK	Collagen alpha-3(VI) chain OS=Gallus gallus GN=COL6A3 PE=4 SV=1	1178	339408	42.6	9142	1	1	1	4399118	0
2	1	2::F1P2F0_CHICK	Collagen alpha-3(VI) chain OS=Gallus gallus GN=COL6A3 PE=4 SV=1	1178	339408	42.6	9148	1	1	1	6598743	0
2	1	2::F1P2F0_CHICK	Collagen alpha-3(VI) chain OS=Gallus gallus GN=COL6A3 PE=4 SV=1	1178	339408	42.6	9438	1	1	1	6778583	0
2	1	2::F1P2F0_CHICK	Collagen alpha-3(VI) chain OS=Gallus gallus GN=COL6A3 PE=4 SV=1	1178	339408	42.6	9439	1	1	1	4522415	0
2	1	2::F1P2F0_CHICK	Collagen alpha-3(VI) chain OS=Gallus gallus GN=COL6A3 PE=4 SV=1	1178	339408	42.6	9440	1	1	1	6778587	0
2	1	2::F1P2F0_CHICK	Collagen alpha-3(VI) chain OS=Gallus gallus GN=COL6A3 PE=4 SV=1	1178	339408	42.6	9458	1	1	1	6788610	0
2	1	2::F1P2F0_CHICK	Collagen alpha-3(VI) chain OS=Gallus gallus GN=COL6A3 PE=4 SV=1	1178	339408	42.6	9459	1	1	1	6788612	0
2	1	2::F1P2F0_CHICK	Collagen alpha-3(VI) chain OS=Gallus gallus GN=COL6A3 PE=4 SV=1	1178	339408	42.6	9460	1	1	1	4529100	0
2	1	2::F1P2F0_CHICK	Collagen alpha-3(VI) chain OS=Gallus gallus GN=COL6A3 PE=4 SV=1	1178	339408	42.6	9624	1	1	1	6908119	0
2	1	2::F1P2F0_CHICK	Collagen alpha-3(VI) chain OS=Gallus gallus GN=COL6A3 PE=4 SV=1	1178	339408	42.6	9625	1	1	1	4608772	0
2	1	2::F1P2F0_CHICK	Collagen alpha-3(VI) chain OS=Gallus gallus GN=COL6A3 PE=4 SV=1	1178	339408	42.6	9626	1	1	1	6908122	0
2	1	2::F1P2F0_CHICK	Collagen alpha-3(VI) chain OS=Gallus gallus GN=COL6A3 PE=4 SV=1	1178	339408	42.6	9699	1	1	1	4635728	0
2	1	2::F1P2F0_CHICK	Collagen alpha-3(VI) chain OS=Gallus gallus GN=COL6A3 PE=4 SV=1	1178	339408	42.6	9700	1	1	1	4635730	0
2	1	2::F1P2F0_CHICK	Collagen alpha-3(VI) chain OS=Gallus gallus GN=COL6A3 PE=4 SV=1	1178	339408	42.6	9716	1	1	1	6963638	0
2	1	2::F1P2F0_CHICK	Collagen alpha-3(VI) chain OS=Gallus gallus GN=COL6A3 PE=4 SV=1	1178	339408	42.6	9717	1	1	1	4645784	0
2	1	2::F1P2F0_CHICK	Collagen alpha-3(VI) chain OS=Gallus gallus GN=COL6A3 PE=4 SV=1	1178	339408	42.6	9954	1	1	1	4746216	0
2	1	2::F1P2F0_CHICK	Collagen alpha-3(VI) chain OS=Gallus gallus GN=COL6A3 PE=4 SV=1	1178	339408	42.6	9955	1	1	1	7114288	0
2	1	2::F1P2F0_CHICK	Collagen alpha-3(VI) chain OS=Gallus gallus GN=COL6A3 PE=4 SV=1	1178	339408	42.6	9956	1	1	1	4746221	0
2	1	2::F1P2F0_CHICK	Collagen alpha-3(VI) chain OS=Gallus gallus GN=COL6A3 PE=4 SV=1	1178	339408	42.6	9957	1	1	1	7114301	0
2	1	2::F1P2F0_CHICK	Collagen alpha-3(VI) chain OS=Gallus gallus GN=COL6A3 PE=4 SV=1	1178	339408	42.6	9968	1	1	1	4756065	0
2	1	2::F1P2F0_CHICK	Collagen alpha-3(VI) chain OS=Gallus gallus GN=COL6A3 PE=4 SV=1	1178	339408	42.6	10096	1	1	1	7228609	0
2	1	2::F1P2F0_CHICK	Collagen alpha-3(VI) chain OS=Gallus gallus GN=COL6A3 PE=4 SV=1	1178	339408	42.6	10149	1	1	1	7263728	0
2	1	2::F1P2F0_CHICK	Collagen alpha-3(VI) chain OS=Gallus gallus GN=COL6A3 PE=4 SV=1	1178	339408	42.6	10150	1	1	1	4845852	0
2	1	2::F1P2F0_CHICK	Collagen alpha-3(VI) chain OS=Gallus gallus GN=COL6A3 PE=4 SV=1	1178	339408	42.6	10151	1	1	1	7263741	0
2	1	2::F1P2F0_CHICK	Collagen alpha-3(VI) chain OS=Gallus gallus GN=COL6A3 PE=4 SV=1	1178	339408	42.6	10184	1	1	1	7293935	0
2	1	2::F1P2F0_CHICK	Collagen alpha-3(VI) chain OS=Gallus gallus GN=COL6A3 PE=4 SV=1	1178	339408	42.6	10185	1	1	1	4865988	0
2	1	2::F1P2F0_CHICK	Collagen alpha-3(VI) chain OS=Gallus gallus GN=COL6A3 PE=4 SV=1	1178	339408	42.6	10186	1	1	1	7293948	0
2	1	2::F1P2F0_CHICK	Collagen alpha-3(VI) chain OS=Gallus gallus GN=COL6A3 PE=4 SV=1	1178	339408	42.6	10244	1	1	1	7323799	0
2	1	2::F1P2F0_CHICK	Collagen alpha-3(VI) chain OS=Gallus gallus GN=COL6A3 PE=4 SV=1	1178	339408	42.6	10245	1	1	1	7323801	0
2	1	2::F1P2F0_CHICK	Collagen alpha-3(VI) chain OS=Gallus gallus GN=COL6A3 PE=4 SV=1	1178	339408	42.6	10246	1	1	1	4885895	0
2	1	2::F1P2F0_CHICK	Collagen alpha-3(VI) chain OS=Gallus gallus GN=COL6A3 PE=4 SV=1	1178	339408	42.6	10330	1	1	1	7398549	0
2	1	2::F1P2F0_CHICK	Collagen alpha-3(VI) chain OS=Gallus gallus GN=COL6A3 PE=4 SV=1	1178	339408	42.6	10331	1	1	1	7398555	0
2	1	2::F1P2F0_CHICK	Collagen alpha-3(VI) chain OS=Gallus gallus GN=COL6A3 PE=4 SV=1	1178	339408	42.6	10332	1	1	1	7398560	0
2	1	2::F1P2F0_CHICK	Collagen alpha-3(VI) chain OS=Gallus gallus GN=COL6A3 PE=4 SV=1	1178	339408	42.6	10333	1	1	1	4935732	0
2	1	2::F1P2F0_CHICK	Collagen alpha-3(VI) chain OS=Gallus gallus GN=COL6A3 PE=4 SV=1	1178	339408	42.6	10334	1	1	1	4935733	0
2	1	2::F1P2F0_CHICK	Collagen alpha-3(VI) chain OS=Gallus gallus GN=COL6A3 PE=4 SV=1	1178	339408	42.6	10464	1	1	1	7498546	0
2	1	2::F1P2F0_CHICK	Collagen alpha-3(VI) chain OS=Gallus gallus GN=COL6A3 PE=4 SV=1	1178	339408	42.6	10465	1	1	1	7498555	0
2	1	2::F1P2F0_CHICK	Collagen alpha-3(VI) chain OS=Gallus gallus GN=COL6A3 PE=4 SV=1	1178	339408	42.6	10466	1	1	1	5002394	0
2	1	2::F1P2F0_CHICK	Collagen alpha-3(VI) chain OS=Gallus gallus GN=COL6A3 PE=4 SV=1	1178	339408	42.6	10559	1	1	1	5038884	0
2	1	2::F1P2F0_CHICK	Collagen alpha-3(VI) chain OS=Gallus gallus GN=COL6A3 PE=4 SV=1	1178	339408	42.6	10560	1	1	1	7553290	0
2	1	2::F1P2F0_CHICK	Collagen alpha-3(VI) chain OS=Gallus gallus GN=COL6A3 PE=4 SV=1	1178	339408	42.6	10631	1	1	1	5072764	1
2	1	2::F1P2F0_CHICK	Collagen alpha-3(VI) chain OS=Gallus gallus GN=COL6A3 PE=4 SV=1	1178	339408	42.6	10725	1	1	1	7668897	0
2	1	2::F1P2F0_CHICK	Collagen alpha-3(VI) chain OS=Gallus gallus GN=COL6A3 PE=4 SV=1	1178	339408	42.6	10726	1	1	1	7668908	0
2	1	2::F1P2F0_CHICK	Collagen alpha-3(VI) chain OS=Gallus gallus GN=COL6A3 PE=4 SV=1	1178	339408	42.6	10727	1	1	1	5115967	0
2	1	2::F1P2F0_CHICK	Collagen alpha-3(VI) chain OS=Gallus gallus GN=COL6A3 PE=4 SV=1	1178	339408	42.6	10728	1	1	1	5115970	0
2	1	2::F1P2F0_CHICK	Collagen alpha-3(VI) chain OS=Gallus gallus GN=COL6A3 PE=4 SV=1	1178	339408	42.6	10878	1	1	1	5186352	0
2	1	2::F1P2F0_CHICK	Collagen alpha-3(VI) chain OS=Gallus gallus GN=COL6A3 PE=4 SV=1	1178	339408	42.6	10879	1	1	1	7774492	0
2	1	2::F1P2F0_CHICK	Collagen alpha-3(VI) chain OS=Gallus gallus GN=COL6A3 PE=4 SV=1	1178	339408	42.6	10880	1	1	1	7774498	0
2	1	2::F1P2F0_CHICK	Collagen alpha-3(VI) chain OS=Gallus gallus GN=COL6A3 PE=4 SV=1	1178	339408	42.6	10881	1	1	1	5186360	0
2	1	2::F1P2F0_CHICK	Collagen alpha-3(VI) chain OS=Gallus gallus GN=COL6A3 PE=4 SV=1	1178	339408	42.6	11220	1	1	1	5316112	0
2	1	2::F1P2F0_CHICK	Collagen alpha-3(VI) chain OS=Gallus gallus GN=COL6A3 PE=4 SV=1	1178	339408	42.6	11221	1	1	1	7969138	0
2	1	2::F1P2F0_CHICK	Collagen alpha-3(VI) chain OS=Gallus gallus GN=COL6A3 PE=4 SV=1	1178	339408	42.6	11222	1	1	1	5316120	0
2	1	2::F1P2F0_CHICK	Collagen alpha-3(VI) chain OS=Gallus gallus GN=COL6A3 PE=4 SV=1	1178	339408	42.6	11233	1	1	1	5322671	0
2	1	2::F1P2F0_CHICK	Collagen alpha-3(VI) chain OS=Gallus gallus GN=COL6A3 PE=4 SV=1	1178	339408	42.6	11234	1	1	1	5322673	0
2	1	2::F1P2F0_CHICK	Collagen alpha-3(VI) chain OS=Gallus gallus GN=COL6A3 PE=4 SV=1	1178	339408	42.6	11235	1	1	1	5322675	0
2	1	2::F1P2F0_CHICK	Collagen alpha-3(VI) chain OS=Gallus gallus GN=COL6A3 PE=4 SV=1	1178	339408	42.6	11236	1	1	1	5322675	0
2	1	2::F1P2F0_CHICK	Collagen alpha-3(VI) chain OS=Gallus gallus GN=COL6A3 PE=4 SV=1	1178	339408	42.6	11237	1	1	1	7978978	0
2	1	2::F1P2F0_CHICK	Collagen alpha-3(VI) chain OS=Gallus gallus GN=COL6A3 PE=4 SV=1	1178	339408	42.6	11238	1	1	1	7978992	0
2	1	2::F1P2F0_CHICK	Collagen alpha-3(VI) chain OS=Gallus gallus GN=COL6A3 PE=4 SV=1	1178	339408	42.6	11318	1	1	1	5362716	1
2	1	2::F1P2F0_CHICK	Collagen alpha-3(VI) chain OS=Gallus gallus GN=COL6A3 PE=4 SV=1	1178	339408	42.6	11594	1	1	1	5492903	0
2	1	2::F1P2F0_CHICK	Collagen alpha-3(VI) chain OS=Gallus gallus GN=COL6A3 PE=4 SV=1	1178	339408	42.6	11595	1	1	1	8234321	0
2	1	2::F1P2F0_CHICK	Collagen alpha-3(VI) chain OS=Gallus gallus GN=COL6A3 PE=4 SV=1	1178	339408	42.6	11596	1	1	1	8234322	0
2	1	2::F1P2F0_CHICK	Collagen alpha-3(VI) chain OS=Gallus gallus GN=COL6A3 PE=4 SV=1	1178	339408	42.6	11597	1	1	1	5492909	0
2	1	2::F1P2F0_CHICK	Collagen alpha-3(VI) chain OS=Gallus gallus GN=COL6A3 PE=4 SV=1	1178	339408	42.6	11841	1	1	1	5629794	0
2	1	2::F1P2F0_CHICK	Collagen alpha-3(VI) chain OS=Gallus gallus GN=COL6A3 PE=4 SV=1	1178	339408	42.6	11842	1	1	1	8439662	0
2	1	2::F1P2F0_CHICK	Collagen alpha-3(VI) chain OS=Gallus gallus GN=COL6A3 PE=4 SV=1	1178	339408	42.6	11843	1	1	1	8439757	0
2	1	2::F1P2F0_CHICK	Collagen alpha-3(VI) chain OS=Gallus gallus GN=COL6A3 PE=4 SV=1	1178	339408	42.6	11844	1	1	1	8439763	0
2	1	2::F1P2F0_CHICK	Collagen alpha-3(VI) chain OS=Gallus gallus GN=COL6A3 PE=4 SV=1	1178	339408	42.6	11845	1	1	1	8439763	0
2	1	2::F1P2F0_CHICK	Collagen alpha-3(VI) chain OS=Gallus gallus GN=COL6A3 PE=4 SV=1	1178	339408	42.6	11846	1	1	1	5629867	0
2	1	2::F1P2F0_CHICK	Collagen alpha-3(VI) chain OS=Gallus gallus GN=COL6A3 PE=4 SV=1	1178	339408	42.6	11847	1	1	1	5629867	0
2	1	2::F1P2F0_CHICK	Collagen alpha-3(VI) chain OS=Gallus gallus GN=COL6A3 PE=4 SV=1	1178	339408	42.6	11848	1	1	1	5629868	0
2	1	2::F1P2F0_CHICK	Collagen alpha-3(VI) chain OS=Gallus gallus GN=COL6A3 PE=4 SV=1	1178	339408	42.6	11849	1	1	1	5629869	0
2	1	2::F1P2F0_CHICK	Collagen alpha-3(VI) chain OS=Gallus gallus GN=COL6A3 PE=4 SV=1	1178	339408	42.6	11850	1	1	1	8439770	0
2	1	2::F1P2F0_CHICK	Collagen alpha-3(VI) chain OS=Gallus gallus GN=COL6A3 PE=4 SV=1	1178	339408	42.6	11851	1	1	1	5629871	0
2	1	2::F1P2F0_CHICK	Collagen alpha-3(VI) chain OS=Gallus gallus GN=COL6A3 PE=4 SV=1	1178	339408	42.6	11852	1	1	1	5629877	0
2	1	2::F1P2F0_CHICK	Collagen alpha-3(VI) chain OS=Gallus gallus GN=COL6A3 PE=4 SV=1	1178	339408	42.6	11856	1	1	1	5632949	1
2	1	2::F1P2F0_CHICK	Collagen alpha-3(VI) chain OS=Gallus gallus GN=COL6A3 PE=4 SV=1	1178	339408	42.6	11857	1	1	1	8444781	0
2	1	2::F1P2F0_CHICK	Collagen alpha-3(VI) chain OS=Gallus gallus GN=COL6A3 PE=4 SV=1	1178	339408	42.6	12008	1	1	1	5696064	0
2	1	2::F1P2F0_CHICK	Collagen alpha-3(VI) chain OS=Gallus gallus GN=COL6A3 PE=4 SV=1	1178	339408	42.6	12120	1	1	1	4299984	0
2	1	2::F1P2F0_CHICK	Collagen alpha-3(VI) chain OS=Gallus gallus GN=COL6A3 PE=4 SV=1	1178	339408	42.6	12121	1	1	1	5729959	0
2	1	2::F1P2F0_CHICK	Collagen alpha-3(VI) chain OS=Gallus gallus GN=COL6A3 PE=4 SV=1	1178	339408	42.6	12144	1	1	1	8614591	0
2	1	2::F1P2F0_CHICK	Collagen alpha-3(VI) chain OS=Gallus gallus GN=COL6A3 PE=4 SV=1	1178	339408	42.6	12145	1	1	1	5746419	0
2	1	2::F1P2F0_CHICK	Collagen alpha-3(VI) chain OS=Gallus gallus GN=COL6A3 PE=4 SV=1	1178	339408	42.6	12146	1	1	1	5746421	0
2	1	2::F1P2F0_CHICK	Collagen alpha-3(VI) chain OS=Gallus gallus GN=COL6A3 PE=4 SV=1	1178	339408	42.6	12147	1	1	1	8614600	0
2	1	2::F1P2F0_CHICK	Collagen alpha-3(VI) chain OS=Gallus gallus GN=COL6A3 PE=4 SV=1	1178	339408	42.6	12151	1	1	1	8619480	0
2	1	2::F1P2F0_CHICK	Collagen alpha-3(VI) chain OS=Gallus gallus GN=COL6A3 PE=4 SV=1	1178	339408	42.6	12152	1	1	1	5749679	0
2	1	2::F1P2F0_CHICK	Collagen alpha-3(VI) chain OS=Gallus gallus GN=COL6A3 PE=4 SV=1	1178	339408	42.6	12153	1	1	1	5749680	0
2	1	2::F1P2F0_CHICK	Collagen alpha-3(VI) chain OS=Gallus gallus GN=COL6A3 PE=4 SV=1	1178	339408	42.6	12154	1	1	1	8619484	0
2	1	2::F1P2F0_CHICK	Collagen alpha-3(VI) chain OS=Gallus gallus GN=COL6A3 PE=4 SV=1	1178	339408	42.6	12176	1	1	1	5760039	0
2	1	2::F1P2F0_CHICK	Collagen alpha-3(VI) chain OS=Gallus gallus GN=COL6A3 PE=4 SV=1	1178	339408	42.6	12177	1	1	1	8635026	0
2	1	2::F1P2F0_CHICK	Collagen alpha-3(VI) chain OS=Gallus gallus GN=COL6A3 PE=4 SV=1	1178	339408	42.6	12223	1	1	1	5776539	0
2	1	2::F1P2F0_CHICK	Collagen alpha-3(VI) chain OS=Gallus gallus GN=COL6A3 PE=4 SV=1	1178	339408	42.6	12224	1	1	1	8659776	0
2	1	2::F1P2F0_CHICK	Collagen alpha-3(VI) chain OS=Gallus gallus GN=COL6A3 PE=4 SV=1	1178	339408	42.6	12253	1	1	1	8685084	0
2	1	2::F1P2F0_CHICK	Collagen alpha-3(VI) chain OS=Gallus gallus GN=COL6A3 PE=4 SV=1	1178	339408	42.6	12254	1	1	1	5793417	0
2	1	2::F1P2F0_CHICK	Collagen alpha-3(VI) chain OS=Gallus gallus GN=COL6A3 PE=4 SV=1	1178	339408	42.6	12255	1	1	1	5793420	0
2	1	2::F1P2F0_CHICK	Collagen alpha-3(VI) chain OS=Gallus gallus GN=COL6A3 PE=4 SV=1	1178	339408	42.6	12256	1	1	1	8685098	0
2	1	2::F1P2F0_CHICK	Collagen alpha-3(VI) chain OS=Gallus gallus GN=COL6A3 PE=4 SV=1	1178	339408	42.6	12258	1	1	1	5793428	0
2	1	2::F1P2F0_CHICK	Collagen alpha-3(VI) chain OS=Gallus gallus GN=COL6A3 PE=4 SV=1	1178	339408	42.6	12315	1	1	1	8724334	0
2	1	2::F1P2F0_CHICK	Collagen alpha-3(VI) chain OS=Gallus gallus GN=COL6A3 PE=4 SV=1	1178	339408	42.6	12316	1	1	1	5819598	0
2	1	2::F1P2F0_CHICK	Collagen alpha-3(VI) chain OS=Gallus gallus GN=COL6A3 PE=4 SV=1	1178	339408	42.6	12387	1	1	1	8785100	0
2	1	2::F1P2F0_CHICK	Collagen alpha-3(VI) chain OS=Gallus gallus GN=COL6A3 PE=4 SV=1	1178	339408	42.6	12388	1	1	1	5860095	0
2	1	2::F1P2F0_CHICK	Collagen alpha-3(VI) chain OS=Gallus gallus GN=COL6A3 PE=4 SV=1	1178	339408	42.6	12608	1	1	1	5999818	0
2	1	2::F1P2F0_CHICK	Collagen alpha-3(VI) chain OS=Gallus gallus GN=COL6A3 PE=4 SV=1	1178	339408	42.6	12609	1	1	1	8994693	0
2	1	2::F1P2F0_CHICK	Collagen alpha-3(VI) chain OS=Gallus gallus GN=COL6A3 PE=4 SV=1	1178	339408	42.6	12610	1	1	1	5999824	0
2	1	2::F1P2F0_CHICK	Collagen alpha-3(VI) chain OS=Gallus gallus GN=COL6A3 PE=4 SV=1	1178	339408	42.6	12611	1	1	1	8994706	0
2	1	2::F1P2F0_CHICK	Collagen alpha-3(VI) chain OS=Gallus gallus GN=COL6A3 PE=4 SV=1	1178	339408	42.6	12635	1	1	1	9009664	0
2	1	2::F1P2F0_CHICK	Collagen alpha-3(VI) chain OS=Gallus gallus GN=COL6A3 PE=4 SV=1	1178	339408	42.6	12636	1	1	1	9009674	0
2	1	2::F1P2F0_CHICK	Collagen alpha-3(VI) chain OS=Gallus gallus GN=COL6A3 PE=4 SV=1	1178	339408	42.6	12637	1	1	1	6009808	0
2	1	2::F1P2F0_CHICK	Collagen alpha-3(VI) chain OS=Gallus gallus GN=COL6A3 PE=4 SV=1	1178	339408	42.6	12638	1	1	1	6009809	0
2	1	2::F1P2F0_CHICK	Collagen alpha-3(VI) chain OS=Gallus gallus GN=COL6A3 PE=4 SV=1	1178	339408	42.6	12720	1	1	1	9108982	0
2	1	2::F1P2F0_CHICK	Collagen alpha-3(VI) chain OS=Gallus gallus GN=COL6A3 PE=4 SV=1	1178	339408	42.6	12789	1	1	1	6110104	0
2	1	2::F1P2F0_CHICK	Collagen alpha-3(VI) chain OS=Gallus gallus GN=COL6A3 PE=4 SV=1	1178	339408	42.6	12790	1	1	1	9160127	0
2	1	2::F1P2F0_CHICK	Collagen alpha-3(VI) chain OS=Gallus gallus GN=COL6A3 PE=4 SV=1	1178	339408	42.6	12791	1	1	1	9160127	0
2	1	2::F1P2F0_CHICK	Collagen alpha-3(VI) chain OS=Gallus gallus GN=COL6A3 PE=4 SV=1	1178	339408	42.6	12792	1	1	1	6110110	0
2	1	2::F1P2F0_CHICK	Collagen alpha-3(VI) chain OS=Gallus gallus GN=COL6A3 PE=4 SV=1	1178	339408	42.6	12940	1	1	1	6190247	0
2	1	2::F1P2F0_CHICK	Collagen alpha-3(VI) chain OS=Gallus gallus GN=COL6A3 PE=4 SV=1	1178	339408	42.6	12941	1	1	1	9280357	0
2	1	2::F1P2F0_CHICK	Collagen alpha-3(VI) chain OS=Gallus gallus GN=COL6A3 PE=4 SV=1	1178	339408	42.6	12944	1	1	1	9285366	0
2	1	2::F1P2F0_CHICK	Collagen alpha-3(VI) chain OS=Gallus gallus GN=COL6A3 PE=4 SV=1	1178	339408	42.6	13047	1	1	1	6286696	0
2	1	2::F1P2F0_CHICK	Collagen alpha-3(VI) chain OS=Gallus gallus GN=COL6A3 PE=4 SV=1	1178	339408	42.6	13048	1	1	1	6286700	0
2	1	2::F1P2F0_CHICK	Collagen alpha-3(VI) chain OS=Gallus gallus GN=COL6A3 PE=4 SV=1	1178	339408	42.6	13049	1	1	1	9425016	0
2	1	2::F1P2F0_CHICK	Collagen alpha-3(VI) chain OS=Gallus gallus GN=COL6A3 PE=4 SV=1	1178	339408	42.6	13555	1	1	1	6653988	0
2	1	2::F1P2F0_CHICK	Collagen alpha-3(VI) chain OS=Gallus gallus GN=COL6A3 PE=4 SV=1	1178	339408	42.6	13556	1	1	1	9975974	0
2	1	2::F1P2F0_CHICK	Collagen alpha-3(VI) chain OS=Gallus gallus GN=COL6A3 PE=4 SV=1	1178	339408	42.6	13561	1	1	1	6656872	0
2	1	2::F1P2F0_CHICK	Collagen alpha-3(VI) chain OS=Gallus gallus GN=COL6A3 PE=4 SV=1	1178	339408	42.6	13562	1	1	1	6656873	0
2	1	2::F1P2F0_CHICK	Collagen alpha-3(VI) chain OS=Gallus gallus GN=COL6A3 PE=4 SV=1	1178	339408	42.6	13565	1	1	1	6663167	0
2	1	2::F1P2F0_CHICK	Collagen alpha-3(VI) chain OS=Gallus gallus GN=COL6A3 PE=4 SV=1	1178	339408	42.6	13566	1	1	1	4999897	0
2	1	2::F1P2F0_CHICK	Collagen alpha-3(VI) chain OS=Gallus gallus GN=COL6A3 PE=4 SV=1	1178	339408	42.6	13567	1	1	1	9989723	0
2	1	2::F1P2F0_CHICK	Collagen alpha-3(VI) chain OS=Gallus gallus GN=COL6A3 PE=4 SV=1	1178	339408	42.6	13568	1	1	1	6663177	0
2	1	2::F1P2F0_CHICK	Collagen alpha-3(VI) chain OS=Gallus gallus GN=COL6A3 PE=4 SV=1	1178	339408	42.6	13682	1	1	1	6770249	0
2	1	2::F1P2F0_CHICK	Collagen alpha-3(VI) chain OS=Gallus gallus GN=COL6A3 PE=4 SV=1	1178	339408	42.6	13864	1	1	1	6957100	0
2	1	2::F1P2F0_CHICK	Collagen alpha-3(VI) chain OS=Gallus gallus GN=COL6A3 PE=4 SV=1	1178	339408	42.6	13866	1	1	1	10430620	0
2	1	2::F1P2F0_CHICK	Collagen alpha-3(VI) chain OS=Gallus gallus GN=COL6A3 PE=4 SV=1	1178	339408	42.6	13867	1	1	1	6957105	0
2	1	2::F1P2F0_CHICK	Collagen alpha-3(VI) chain OS=Gallus gallus GN=COL6A3 PE=4 SV=1	1178	339408	42.6	14029	1	1	1	7080980	1
2	1	2::F1P2F0_CHICK	Collagen alpha-3(VI) chain OS=Gallus gallus GN=COL6A3 PE=4 SV=1	1178	339408	42.6	14030	1	1	1	7080997	1
2	1	2::F1P2F0_CHICK	Collagen alpha-3(VI) chain OS=Gallus gallus GN=COL6A3 PE=4 SV=1	1178	339408	42.6	14235	1	1	1	7236779	0
2	1	2::F1P2F0_CHICK	Collagen alpha-3(VI) chain OS=Gallus gallus GN=COL6A3 PE=4 SV=1	1178	339408	42.6	14236	1	1	1	7236784	0
2	1	2::F1P2F0_CHICK	Collagen alpha-3(VI) chain OS=Gallus gallus GN=COL6A3 PE=4 SV=1	1178	339408	42.6	14237	1	1	1	10850141	0
2	1	2::F1P2F0_CHICK	Collagen alpha-3(VI) chain OS=Gallus gallus GN=COL6A3 PE=4 SV=1	1178	339408	42.6	14259	1	1	1	7254045	0
2	1	2::F1P2F0_CHICK	Collagen alpha-3(VI) chain OS=Gallus gallus GN=COL6A3 PE=4 SV=1	1178	339408	42.6	14260	1	1	1	5443054	0
2	1	2::F1P2F0_CHICK	Collagen alpha-3(VI) chain OS=Gallus gallus GN=COL6A3 PE=4 SV=1	1178	339408	42.6	14261	1	1	1	5443059	0
2	1	2::F1P2F0_CHICK	Collagen alpha-3(VI) chain OS=Gallus gallus GN=COL6A3 PE=4 SV=1	1178	339408	42.6	14305	1	1	1	7317253	0
2	1	2::F1P2F0_CHICK	Collagen alpha-3(VI) chain OS=Gallus gallus GN=COL6A3 PE=4 SV=1	1178	339408	42.6	14307	1	1	1	7320593	0
2	1	2::F1P2F0_CHICK	Collagen alpha-3(VI) chain OS=Gallus gallus GN=COL6A3 PE=4 SV=1	1178	339408	42.6	14624	1	1	1	7650316	0
2	1	2::F1P2F0_CHICK	Collagen alpha-3(VI) chain OS=Gallus gallus GN=COL6A3 PE=4 SV=1	1178	339408	42.6	14626	1	1	1	11470442	0
2	1	2::F1P2F0_CHICK	Collagen alpha-3(VI) chain OS=Gallus gallus GN=COL6A3 PE=4 SV=1	1178	339408	42.6	14627	1	1	1	11470446	0
2	1	2::F1P2F0_CHICK	Collagen alpha-3(VI) chain OS=Gallus gallus GN=COL6A3 PE=4 SV=1	1178	339408	42.6	14628	1	1	1	7650328	0
2	1	2::F1P2F0_CHICK	Collagen alpha-3(VI) chain OS=Gallus gallus GN=COL6A3 PE=4 SV=1	1178	339408	42.6	14641	1	1	1	7680800	0
2	1	2::F1P2F0_CHICK	Collagen alpha-3(VI) chain OS=Gallus gallus GN=COL6A3 PE=4 SV=1	1178	339408	42.6	14707	1	1	1	7774036	0
2	1	2::F1P2F0_CHICK	Collagen alpha-3(VI) chain OS=Gallus gallus GN=COL6A3 PE=4 SV=1	1178	339408	42.6	14708	1	1	1	11656030	0
2	1	2::F1P2F0_CHICK	Collagen alpha-3(VI) chain OS=Gallus gallus GN=COL6A3 PE=4 SV=1	1178	339408	42.6	14736	1	1	1	7807496	0
2	1	2::F1P2F0_CHICK	Collagen alpha-3(VI) chain OS=Gallus gallus GN=COL6A3 PE=4 SV=1	1178	339408	42.6	14737	1	1	1	7807496	0
2	1	2::F1P2F0_CHICK	Collagen alpha-3(VI) chain OS=Gallus gallus GN=COL6A3 PE=4 SV=1	1178	339408	42.6	14738	1	1	1	7807500	0
2	1	2::F1P2F0_CHICK	Collagen alpha-3(VI) chain OS=Gallus gallus GN=COL6A3 PE=4 SV=1	1178	339408	42.6	14739	1	1	1	11706216	0
2	1	2::F1P2F0_CHICK	Collagen alpha-3(VI) chain OS=Gallus gallus GN=COL6A3 PE=4 SV=1	1178	339408	42.6	14740	1	1	1	11706216	0
2	1	2::F1P2F0_CHICK	Collagen alpha-3(VI) chain OS=Gallus gallus GN=COL6A3 PE=4 SV=1	1178	339408	42.6	14860	1	1	1	7997291	0
2	1	2::F1P2F0_CHICK	Collagen alpha-3(VI) chain OS=Gallus gallus GN=COL6A3 PE=4 SV=1	1178	339408	42.6	14861	1	1	1	11990918	0
2	1	2::F1P2F0_CHICK	Collagen alpha-3(VI) chain OS=Gallus gallus GN=COL6A3 PE=4 SV=1	1178	339408	42.6	14962	1	1	1	8157709	0
2	1	2::F1P2F0_CHICK	Collagen alpha-3(VI) chain OS=Gallus gallus GN=COL6A3 PE=4 SV=1	1178	339408	42.6	14963	1	1	1	6120803	0
2	1	2::F1P2F0_CHICK	Collagen alpha-3(VI) chain OS=Gallus gallus GN=COL6A3 PE=4 SV=1	1178	339408	42.6	14964	1	1	1	12231542	0
2	1	2::F1P2F0_CHICK	Collagen alpha-3(VI) chain OS=Gallus gallus GN=COL6A3 PE=4 SV=1	1178	339408	42.6	14983	1	1	1	8214382	0
2	1	2::F1P2F0_CHICK	Collagen alpha-3(VI) chain OS=Gallus gallus GN=COL6A3 PE=4 SV=1	1178	339408	42.6	14989	1	1	1	8234169	0
2	1	2::F1P2F0_CHICK	Collagen alpha-3(VI) chain OS=Gallus gallus GN=COL6A3 PE=4 SV=1	1178	339408	42.6	15167	1	1	1	8564499	0
2	1	2::F1P2F0_CHICK	Collagen alpha-3(VI) chain OS=Gallus gallus GN=COL6A3 PE=4 SV=1	1178	339408	42.6	15210	1	1	1	8647669	0
2	1	2::F1P2F0_CHICK	Collagen alpha-3(VI) chain OS=Gallus gallus GN=COL6A3 PE=4 SV=1	1178	339408	42.6	15211	1	1	1	8647670	0
2	1	2::F1P2F0_CHICK	Collagen alpha-3(VI) chain OS=Gallus gallus GN=COL6A3 PE=4 SV=1	1178	339408	42.6	15212	1	1	1	6488291	0
2	1	2::F1P2F0_CHICK	Collagen alpha-3(VI) chain OS=Gallus gallus GN=COL6A3 PE=4 SV=1	1178	339408	42.6	15745	1	1	1	10394894	0
2	1	2::F1P2F0_CHICK	Collagen alpha-3(VI) chain OS=Gallus gallus GN=COL6A3 PE=4 SV=1	1178	339408	42.6	15746	1	1	1	10394897	0
2	1	2::F1P2F0_CHICK	Collagen alpha-3(VI) chain OS=Gallus gallus GN=COL6A3 PE=4 SV=1	1178	339408	42.6	15880	1	1	1	7191708	0
2	1	2::F1P2F0_CHICK	Collagen alpha-3(VI) chain OS=Gallus gallus GN=COL6A3 PE=4 SV=1	1178	339408	42.6	16030	1	1	1	10743190	0	emPAI	0.77
3	1	2::E1BRE9_CHICK	Decorin OS=Gallus gallus GN=DCN PE=4 SV=2	592	39603	54.1	2189	1	1	1	2981404	0
3	1	2::E1BRE9_CHICK	Decorin OS=Gallus gallus GN=DCN PE=4 SV=2	592	39603	54.1	2251	1	1	1	3021896	0
3	1	2::E1BRE9_CHICK	Decorin OS=Gallus gallus GN=DCN PE=4 SV=2	592	39603	54.1	2252	1	1	1	3021897	0
3	1	2::E1BRE9_CHICK	Decorin OS=Gallus gallus GN=DCN PE=4 SV=2	592	39603	54.1	2253	1	1	1	3021897	0
3	1	2::E1BRE9_CHICK	Decorin OS=Gallus gallus GN=DCN PE=4 SV=2	592	39603	54.1	2254	1	1	1	3021897	0
3	1	2::E1BRE9_CHICK	Decorin OS=Gallus gallus GN=DCN PE=4 SV=2	592	39603	54.1	2255	1	1	1	3021898	0
3	1	2::E1BRE9_CHICK	Decorin OS=Gallus gallus GN=DCN PE=4 SV=2	592	39603	54.1	2740	2	1	1	3291611	0
3	1	2::E1BRE9_CHICK	Decorin OS=Gallus gallus GN=DCN PE=4 SV=2	592	39603	54.1	3726	1	1	1	3732140	0
3	1	2::E1BRE9_CHICK	Decorin OS=Gallus gallus GN=DCN PE=4 SV=2	592	39603	54.1	3727	1	1	1	3732143	0
3	1	2::E1BRE9_CHICK	Decorin OS=Gallus gallus GN=DCN PE=4 SV=2	592	39603	54.1	3728	2	1	1	3732143	0
3	1	2::E1BRE9_CHICK	Decorin OS=Gallus gallus GN=DCN PE=4 SV=2	592	39603	54.1	3729	1	1	1	3732146	0
3	1	2::E1BRE9_CHICK	Decorin OS=Gallus gallus GN=DCN PE=4 SV=2	592	39603	54.1	5831	1	1	1	3098230	0
3	1	2::E1BRE9_CHICK	Decorin OS=Gallus gallus GN=DCN PE=4 SV=2	592	39603	54.1	5832	1	1	1	4642316	0
3	1	2::E1BRE9_CHICK	Decorin OS=Gallus gallus GN=DCN PE=4 SV=2	592	39603	54.1	6171	1	1	1	4792402	0
3	1	2::E1BRE9_CHICK	Decorin OS=Gallus gallus GN=DCN PE=4 SV=2	592	39603	54.1	6172	1	1	1	4792403	0
3	1	2::E1BRE9_CHICK	Decorin OS=Gallus gallus GN=DCN PE=4 SV=2	592	39603	54.1	6653	1	1	1	5078043	0
3	1	2::E1BRE9_CHICK	Decorin OS=Gallus gallus GN=DCN PE=4 SV=2	592	39603	54.1	6654	1	1	1	5078044	0
3	1	2::E1BRE9_CHICK	Decorin OS=Gallus gallus GN=DCN PE=4 SV=2	592	39603	54.1	6655	1	1	1	5078045	0
3	1	2::E1BRE9_CHICK	Decorin OS=Gallus gallus GN=DCN PE=4 SV=2	592	39603	54.1	8393	1	1	1	6098121	0
3	1	2::E1BRE9_CHICK	Decorin OS=Gallus gallus GN=DCN PE=4 SV=2	592	39603	54.1	8639	1	1	1	4169197	0
3	1	2::E1BRE9_CHICK	Decorin OS=Gallus gallus GN=DCN PE=4 SV=2	592	39603	54.1	8640	1	1	1	6248761	0
3	1	2::E1BRE9_CHICK	Decorin OS=Gallus gallus GN=DCN PE=4 SV=2	592	39603	54.1	8641	1	1	1	4169200	0
3	1	2::E1BRE9_CHICK	Decorin OS=Gallus gallus GN=DCN PE=4 SV=2	592	39603	54.1	9208	1	1	1	6633130	0
3	1	2::E1BRE9_CHICK	Decorin OS=Gallus gallus GN=DCN PE=4 SV=2	592	39603	54.1	9209	1	1	1	6633130	0
3	1	2::E1BRE9_CHICK	Decorin OS=Gallus gallus GN=DCN PE=4 SV=2	592	39603	54.1	9210	1	1	1	4425444	0
3	1	2::E1BRE9_CHICK	Decorin OS=Gallus gallus GN=DCN PE=4 SV=2	592	39603	54.1	9213	1	1	1	6638039	0
3	1	2::E1BRE9_CHICK	Decorin OS=Gallus gallus GN=DCN PE=4 SV=2	592	39603	54.1	9214	1	1	1	4428722	0
3	1	2::E1BRE9_CHICK	Decorin OS=Gallus gallus GN=DCN PE=4 SV=2	592	39603	54.1	9215	1	1	1	6638049	0
3	1	2::E1BRE9_CHICK	Decorin OS=Gallus gallus GN=DCN PE=4 SV=2	592	39603	54.1	9404	1	1	1	6758612	0
3	1	2::E1BRE9_CHICK	Decorin OS=Gallus gallus GN=DCN PE=4 SV=2	592	39603	54.1	9405	1	1	1	4509100	0
3	1	2::E1BRE9_CHICK	Decorin OS=Gallus gallus GN=DCN PE=4 SV=2	592	39603	54.1	9406	1	1	1	6758617	0
3	1	2::E1BRE9_CHICK	Decorin OS=Gallus gallus GN=DCN PE=4 SV=2	592	39603	54.1	9407	1	1	1	4509109	0
3	1	2::E1BRE9_CHICK	Decorin OS=Gallus gallus GN=DCN PE=4 SV=2	592	39603	54.1	9411	1	1	1	4512383	0
3	1	2::E1BRE9_CHICK	Decorin OS=Gallus gallus GN=DCN PE=4 SV=2	592	39603	54.1	9709	1	1	1	4642554	0
3	1	2::E1BRE9_CHICK	Decorin OS=Gallus gallus GN=DCN PE=4 SV=2	592	39603	54.1	9791	1	1	1	7013837	0
3	1	2::E1BRE9_CHICK	Decorin OS=Gallus gallus GN=DCN PE=4 SV=2	592	39603	54.1	9792	1	1	1	7013839	0
3	1	2::E1BRE9_CHICK	Decorin OS=Gallus gallus GN=DCN PE=4 SV=2	592	39603	54.1	9793	1	1	1	4679251	0
3	1	2::E1BRE9_CHICK	Decorin OS=Gallus gallus GN=DCN PE=4 SV=2	592	39603	54.1	9794	1	1	1	7013848	0
3	1	2::E1BRE9_CHICK	Decorin OS=Gallus gallus GN=DCN PE=4 SV=2	592	39603	54.1	9795	1	1	1	4679256	0
3	1	2::E1BRE9_CHICK	Decorin OS=Gallus gallus GN=DCN PE=4 SV=2	592	39603	54.1	11184	1	1	1	7959275	0
3	1	2::E1BRE9_CHICK	Decorin OS=Gallus gallus GN=DCN PE=4 SV=2	592	39603	54.1	11185	1	1	1	7959289	0
3	1	2::E1BRE9_CHICK	Decorin OS=Gallus gallus GN=DCN PE=4 SV=2	592	39603	54.1	11186	1	1	1	7959290	0
3	1	2::E1BRE9_CHICK	Decorin OS=Gallus gallus GN=DCN PE=4 SV=2	592	39603	54.1	11187	1	1	1	7959292	0
3	1	2::E1BRE9_CHICK	Decorin OS=Gallus gallus GN=DCN PE=4 SV=2	592	39603	54.1	11188	1	1	1	7959293	0
3	1	2::E1BRE9_CHICK	Decorin OS=Gallus gallus GN=DCN PE=4 SV=2	592	39603	54.1	11190	1	1	1	5309555	0
3	1	2::E1BRE9_CHICK	Decorin OS=Gallus gallus GN=DCN PE=4 SV=2	592	39603	54.1	11191	1	1	1	5309555	0
3	1	2::E1BRE9_CHICK	Decorin OS=Gallus gallus GN=DCN PE=4 SV=2	592	39603	54.1	11192	1	1	1	5309556	0
3	1	2::E1BRE9_CHICK	Decorin OS=Gallus gallus GN=DCN PE=4 SV=2	592	39603	54.1	11193	1	1	1	7959298	0
3	1	2::E1BRE9_CHICK	Decorin OS=Gallus gallus GN=DCN PE=4 SV=2	592	39603	54.1	11194	1	1	1	5309558	0
3	1	2::E1BRE9_CHICK	Decorin OS=Gallus gallus GN=DCN PE=4 SV=2	592	39603	54.1	11195	1	1	1	5309558	0
3	1	2::E1BRE9_CHICK	Decorin OS=Gallus gallus GN=DCN PE=4 SV=2	592	39603	54.1	11196	1	1	1	5309559	0
3	1	2::E1BRE9_CHICK	Decorin OS=Gallus gallus GN=DCN PE=4 SV=2	592	39603	54.1	11197	1	1	1	5309559	0
3	1	2::E1BRE9_CHICK	Decorin OS=Gallus gallus GN=DCN PE=4 SV=2	592	39603	54.1	11198	1	1	1	5309560	0
3	1	2::E1BRE9_CHICK	Decorin OS=Gallus gallus GN=DCN PE=4 SV=2	592	39603	54.1	11199	1	1	1	7959304	0
3	1	2::E1BRE9_CHICK	Decorin OS=Gallus gallus GN=DCN PE=4 SV=2	592	39603	54.1	11200	1	1	1	5309560	0
3	1	2::E1BRE9_CHICK	Decorin OS=Gallus gallus GN=DCN PE=4 SV=2	592	39603	54.1	11201	1	1	1	5309561	0
3	1	2::E1BRE9_CHICK	Decorin OS=Gallus gallus GN=DCN PE=4 SV=2	592	39603	54.1	11202	1	1	1	7959305	0
3	1	2::E1BRE9_CHICK	Decorin OS=Gallus gallus GN=DCN PE=4 SV=2	592	39603	54.1	11203	1	1	1	5309561	0
3	1	2::E1BRE9_CHICK	Decorin OS=Gallus gallus GN=DCN PE=4 SV=2	592	39603	54.1	11204	1	1	1	5309562	0
3	1	2::E1BRE9_CHICK	Decorin OS=Gallus gallus GN=DCN PE=4 SV=2	592	39603	54.1	11205	1	1	1	5309562	0
3	1	2::E1BRE9_CHICK	Decorin OS=Gallus gallus GN=DCN PE=4 SV=2	592	39603	54.1	11206	1	1	1	5309562	0
3	1	2::E1BRE9_CHICK	Decorin OS=Gallus gallus GN=DCN PE=4 SV=2	592	39603	54.1	11207	1	1	1	5309562	0
3	1	2::E1BRE9_CHICK	Decorin OS=Gallus gallus GN=DCN PE=4 SV=2	592	39603	54.1	11208	1	1	1	5309562	0
3	1	2::E1BRE9_CHICK	Decorin OS=Gallus gallus GN=DCN PE=4 SV=2	592	39603	54.1	11209	1	1	1	5309563	0
3	1	2::E1BRE9_CHICK	Decorin OS=Gallus gallus GN=DCN PE=4 SV=2	592	39603	54.1	11210	1	1	1	5309564	0
3	1	2::E1BRE9_CHICK	Decorin OS=Gallus gallus GN=DCN PE=4 SV=2	592	39603	54.1	11211	1	1	1	5309564	0
3	1	2::E1BRE9_CHICK	Decorin OS=Gallus gallus GN=DCN PE=4 SV=2	592	39603	54.1	11212	1	1	1	5309565	0
3	1	2::E1BRE9_CHICK	Decorin OS=Gallus gallus GN=DCN PE=4 SV=2	592	39603	54.1	11213	1	1	1	5309565	0
3	1	2::E1BRE9_CHICK	Decorin OS=Gallus gallus GN=DCN PE=4 SV=2	592	39603	54.1	11214	1	1	1	5309567	0
3	1	2::E1BRE9_CHICK	Decorin OS=Gallus gallus GN=DCN PE=4 SV=2	592	39603	54.1	11910	1	1	1	5662971	0
3	1	2::E1BRE9_CHICK	Decorin OS=Gallus gallus GN=DCN PE=4 SV=2	592	39603	54.1	11911	1	1	1	8489435	0
3	1	2::E1BRE9_CHICK	Decorin OS=Gallus gallus GN=DCN PE=4 SV=2	592	39603	54.1	11912	1	1	1	5662982	0
3	1	2::E1BRE9_CHICK	Decorin OS=Gallus gallus GN=DCN PE=4 SV=2	592	39603	54.1	11913	1	1	1	8489437	0
3	1	2::E1BRE9_CHICK	Decorin OS=Gallus gallus GN=DCN PE=4 SV=2	592	39603	54.1	11914	1	1	1	5662982	0
3	1	2::E1BRE9_CHICK	Decorin OS=Gallus gallus GN=DCN PE=4 SV=2	592	39603	54.1	11915	1	1	1	8489438	0
3	1	2::E1BRE9_CHICK	Decorin OS=Gallus gallus GN=DCN PE=4 SV=2	592	39603	54.1	11916	1	1	1	8489439	0
3	1	2::E1BRE9_CHICK	Decorin OS=Gallus gallus GN=DCN PE=4 SV=2	592	39603	54.1	11917	1	1	1	5662984	0
3	1	2::E1BRE9_CHICK	Decorin OS=Gallus gallus GN=DCN PE=4 SV=2	592	39603	54.1	11918	1	1	1	8489441	0
3	1	2::E1BRE9_CHICK	Decorin OS=Gallus gallus GN=DCN PE=4 SV=2	592	39603	54.1	11919	1	1	1	5662985	0
3	1	2::E1BRE9_CHICK	Decorin OS=Gallus gallus GN=DCN PE=4 SV=2	592	39603	54.1	11920	1	1	1	5662986	0
3	1	2::E1BRE9_CHICK	Decorin OS=Gallus gallus GN=DCN PE=4 SV=2	592	39603	54.1	11921	1	1	1	5662986	0
3	1	2::E1BRE9_CHICK	Decorin OS=Gallus gallus GN=DCN PE=4 SV=2	592	39603	54.1	11922	1	1	1	5662987	0
3	1	2::E1BRE9_CHICK	Decorin OS=Gallus gallus GN=DCN PE=4 SV=2	592	39603	54.1	11923	1	1	1	5662989	0
3	1	2::E1BRE9_CHICK	Decorin OS=Gallus gallus GN=DCN PE=4 SV=2	592	39603	54.1	11924	1	1	1	5662990	0
3	1	2::E1BRE9_CHICK	Decorin OS=Gallus gallus GN=DCN PE=4 SV=2	592	39603	54.1	11925	1	1	1	5662992	0
3	1	2::E1BRE9_CHICK	Decorin OS=Gallus gallus GN=DCN PE=4 SV=2	592	39603	54.1	11926	1	1	1	8489455	0
3	1	2::E1BRE9_CHICK	Decorin OS=Gallus gallus GN=DCN PE=4 SV=2	592	39603	54.1	11927	1	1	1	8489456	0
3	1	2::E1BRE9_CHICK	Decorin OS=Gallus gallus GN=DCN PE=4 SV=2	592	39603	54.1	11928	1	1	1	8489459	0
3	1	2::E1BRE9_CHICK	Decorin OS=Gallus gallus GN=DCN PE=4 SV=2	592	39603	54.1	11929	1	1	1	8489468	0
3	1	2::E1BRE9_CHICK	Decorin OS=Gallus gallus GN=DCN PE=4 SV=2	592	39603	54.1	11930	1	1	1	8489475	0
3	1	2::E1BRE9_CHICK	Decorin OS=Gallus gallus GN=DCN PE=4 SV=2	592	39603	54.1	14103	1	1	1	7137454	0
3	1	2::E1BRE9_CHICK	Decorin OS=Gallus gallus GN=DCN PE=4 SV=2	592	39603	54.1	14104	1	1	1	7137457	0
3	1	2::E1BRE9_CHICK	Decorin OS=Gallus gallus GN=DCN PE=4 SV=2	592	39603	54.1	14105	1	1	1	10701152	0
3	1	2::E1BRE9_CHICK	Decorin OS=Gallus gallus GN=DCN PE=4 SV=2	592	39603	54.1	14106	1	1	1	10701153	0
3	1	2::E1BRE9_CHICK	Decorin OS=Gallus gallus GN=DCN PE=4 SV=2	592	39603	54.1	14107	1	1	1	7137461	0
3	1	2::E1BRE9_CHICK	Decorin OS=Gallus gallus GN=DCN PE=4 SV=2	592	39603	54.1	14109	1	1	1	7140716	0
3	1	2::E1BRE9_CHICK	Decorin OS=Gallus gallus GN=DCN PE=4 SV=2	592	39603	54.1	14111	1	1	1	7140735	0
3	1	2::E1BRE9_CHICK	Decorin OS=Gallus gallus GN=DCN PE=4 SV=2	592	39603	54.1	14112	1	1	1	7140740	0
3	1	2::E1BRE9_CHICK	Decorin OS=Gallus gallus GN=DCN PE=4 SV=2	592	39603	54.1	14113	1	1	1	7140740	0
3	1	2::E1BRE9_CHICK	Decorin OS=Gallus gallus GN=DCN PE=4 SV=2	592	39603	54.1	14114	1	1	1	10706077	0
3	1	2::E1BRE9_CHICK	Decorin OS=Gallus gallus GN=DCN PE=4 SV=2	592	39603	54.1	14115	1	1	1	10706077	0
3	1	2::E1BRE9_CHICK	Decorin OS=Gallus gallus GN=DCN PE=4 SV=2	592	39603	54.1	14116	1	1	1	7140742	0
3	1	2::E1BRE9_CHICK	Decorin OS=Gallus gallus GN=DCN PE=4 SV=2	592	39603	54.1	14118	1	1	1	10706083	0
3	1	2::E1BRE9_CHICK	Decorin OS=Gallus gallus GN=DCN PE=4 SV=2	592	39603	54.1	14119	1	1	1	7140748	0
3	1	2::E1BRE9_CHICK	Decorin OS=Gallus gallus GN=DCN PE=4 SV=2	592	39603	54.1	14120	1	1	1	7140751	0
3	1	2::E1BRE9_CHICK	Decorin OS=Gallus gallus GN=DCN PE=4 SV=2	592	39603	54.1	14553	1	1	1	7564462	1
3	1	2::E1BRE9_CHICK	Decorin OS=Gallus gallus GN=DCN PE=4 SV=2	592	39603	54.1	15404	1	1	1	9164560	0
3	1	2::E1BRE9_CHICK	Decorin OS=Gallus gallus GN=DCN PE=4 SV=2	592	39603	54.1	15405	1	1	1	9164562	0	emPAI	1.19
4	1	2::F1NCD4_CHICK	Myosin-9 OS=Gallus gallus GN=MYH9 PE=4 SV=2	570	226497	44.7	2348	4	1	0	3096584	0
4	1	2::F1NCD4_CHICK	Myosin-9 OS=Gallus gallus GN=MYH9 PE=4 SV=2	570	226497	44.7	2607	1	1	0	3201775	1
4	1	2::F1NCD4_CHICK	Myosin-9 OS=Gallus gallus GN=MYH9 PE=4 SV=2	570	226497	44.7	2657	1	1	1	3231822	0
4	1	2::F1NCD4_CHICK	Myosin-9 OS=Gallus gallus GN=MYH9 PE=4 SV=2	570	226497	44.7	2660	1	1	1	3231824	0
4	1	2::F1NCD4_CHICK	Myosin-9 OS=Gallus gallus GN=MYH9 PE=4 SV=2	570	226497	44.7	2732	1	1	1	3287087	0
4	1	2::F1NCD4_CHICK	Myosin-9 OS=Gallus gallus GN=MYH9 PE=4 SV=2	570	226497	44.7	2733	1	1	1	3287088	0
4	1	2::F1NCD4_CHICK	Myosin-9 OS=Gallus gallus GN=MYH9 PE=4 SV=2	570	226497	44.7	2881	1	1	0	3341562	0
4	1	2::F1NCD4_CHICK	Myosin-9 OS=Gallus gallus GN=MYH9 PE=4 SV=2	570	226497	44.7	3429	3	1	1	3596908	0
4	1	2::F1NCD4_CHICK	Myosin-9 OS=Gallus gallus GN=MYH9 PE=4 SV=2	570	226497	44.7	3430	1	1	1	3596909	0
4	1	2::F1NCD4_CHICK	Myosin-9 OS=Gallus gallus GN=MYH9 PE=4 SV=2	570	226497	44.7	3547	1	1	1	3657216	0
4	1	2::F1NCD4_CHICK	Myosin-9 OS=Gallus gallus GN=MYH9 PE=4 SV=2	570	226497	44.7	3634	1	1	1	3696754	0
4	1	2::F1NCD4_CHICK	Myosin-9 OS=Gallus gallus GN=MYH9 PE=4 SV=2	570	226497	44.7	3635	1	1	1	3696755	0
4	1	2::F1NCD4_CHICK	Myosin-9 OS=Gallus gallus GN=MYH9 PE=4 SV=2	570	226497	44.7	3873	4	1	1	3811938	1
4	1	2::F1NCD4_CHICK	Myosin-9 OS=Gallus gallus GN=MYH9 PE=4 SV=2	570	226497	44.7	4264	1	1	1	4012152	0
4	1	2::F1NCD4_CHICK	Myosin-9 OS=Gallus gallus GN=MYH9 PE=4 SV=2	570	226497	44.7	4304	5	1	1	4032012	0
4	1	2::F1NCD4_CHICK	Myosin-9 OS=Gallus gallus GN=MYH9 PE=4 SV=2	570	226497	44.7	4719	1	1	1	4247133	0
4	1	2::F1NCD4_CHICK	Myosin-9 OS=Gallus gallus GN=MYH9 PE=4 SV=2	570	226497	44.7	5316	1	1	1	4452342	0
4	1	2::F1NCD4_CHICK	Myosin-9 OS=Gallus gallus GN=MYH9 PE=4 SV=2	570	226497	44.7	5340	3	1	1	4457719	1
4	1	2::F1NCD4_CHICK	Myosin-9 OS=Gallus gallus GN=MYH9 PE=4 SV=2	570	226497	44.7	5369	1	1	0	4467166	0
4	1	2::F1NCD4_CHICK	Myosin-9 OS=Gallus gallus GN=MYH9 PE=4 SV=2	570	226497	44.7	5464	1	1	1	4512542	0
4	1	2::F1NCD4_CHICK	Myosin-9 OS=Gallus gallus GN=MYH9 PE=4 SV=2	570	226497	44.7	5628	1	1	1	4547492	0
4	1	2::F1NCD4_CHICK	Myosin-9 OS=Gallus gallus GN=MYH9 PE=4 SV=2	570	226497	44.7	5743	1	1	0	4602051	0
4	1	2::F1NCD4_CHICK	Myosin-9 OS=Gallus gallus GN=MYH9 PE=4 SV=2	570	226497	44.7	5794	1	1	1	4627515	0
4	1	2::F1NCD4_CHICK	Myosin-9 OS=Gallus gallus GN=MYH9 PE=4 SV=2	570	226497	44.7	6039	1	1	1	4732676	0
4	1	2::F1NCD4_CHICK	Myosin-9 OS=Gallus gallus GN=MYH9 PE=4 SV=2	570	226497	44.7	6215	1	1	1	4812525	0
4	1	2::F1NCD4_CHICK	Myosin-9 OS=Gallus gallus GN=MYH9 PE=4 SV=2	570	226497	44.7	6581	1	1	1	5022839	0
4	1	2::F1NCD4_CHICK	Myosin-9 OS=Gallus gallus GN=MYH9 PE=4 SV=2	570	226497	44.7	6582	1	1	1	5022841	0
4	1	2::F1NCD4_CHICK	Myosin-9 OS=Gallus gallus GN=MYH9 PE=4 SV=2	570	226497	44.7	6786	1	1	1	5157752	0
4	1	2::F1NCD4_CHICK	Myosin-9 OS=Gallus gallus GN=MYH9 PE=4 SV=2	570	226497	44.7	6787	1	1	1	5157755	0
4	1	2::F1NCD4_CHICK	Myosin-9 OS=Gallus gallus GN=MYH9 PE=4 SV=2	570	226497	44.7	7031	1	1	1	5307776	0
4	1	2::F1NCD4_CHICK	Myosin-9 OS=Gallus gallus GN=MYH9 PE=4 SV=2	570	226497	44.7	7295	1	1	1	5467833	0
4	1	2::F1NCD4_CHICK	Myosin-9 OS=Gallus gallus GN=MYH9 PE=4 SV=2	570	226497	44.7	7508	1	1	1	5587934	0
4	1	2::F1NCD4_CHICK	Myosin-9 OS=Gallus gallus GN=MYH9 PE=4 SV=2	570	226497	44.7	7549	1	1	1	3748687	0
4	1	2::F1NCD4_CHICK	Myosin-9 OS=Gallus gallus GN=MYH9 PE=4 SV=2	570	226497	44.7	7631	1	1	0	5652975	0
4	1	2::F1NCD4_CHICK	Myosin-9 OS=Gallus gallus GN=MYH9 PE=4 SV=2	570	226497	44.7	7873	1	1	1	5803340	1
4	1	2::F1NCD4_CHICK	Myosin-9 OS=Gallus gallus GN=MYH9 PE=4 SV=2	570	226497	44.7	7984	1	1	1	5857557	0
4	1	2::F1NCD4_CHICK	Myosin-9 OS=Gallus gallus GN=MYH9 PE=4 SV=2	570	226497	44.7	8177	1	1	1	5973129	0
4	1	2::F1NCD4_CHICK	Myosin-9 OS=Gallus gallus GN=MYH9 PE=4 SV=2	570	226497	44.7	8258	1	1	1	6027991	0
4	1	2::F1NCD4_CHICK	Myosin-9 OS=Gallus gallus GN=MYH9 PE=4 SV=2	570	226497	44.7	8275	1	1	1	6033258	0
4	1	2::F1NCD4_CHICK	Myosin-9 OS=Gallus gallus GN=MYH9 PE=4 SV=2	570	226497	44.7	8362	1	1	1	6083159	0
4	1	2::F1NCD4_CHICK	Myosin-9 OS=Gallus gallus GN=MYH9 PE=4 SV=2	570	226497	44.7	8363	1	1	1	6083161	0
4	1	2::F1NCD4_CHICK	Myosin-9 OS=Gallus gallus GN=MYH9 PE=4 SV=2	570	226497	44.7	8448	1	1	0	4085518	0
4	1	2::F1NCD4_CHICK	Myosin-9 OS=Gallus gallus GN=MYH9 PE=4 SV=2	570	226497	44.7	8449	1	1	0	4085521	0
4	1	2::F1NCD4_CHICK	Myosin-9 OS=Gallus gallus GN=MYH9 PE=4 SV=2	570	226497	44.7	8594	1	1	1	6217992	0
4	1	2::F1NCD4_CHICK	Myosin-9 OS=Gallus gallus GN=MYH9 PE=4 SV=2	570	226497	44.7	8597	1	1	1	4148712	0
4	1	2::F1NCD4_CHICK	Myosin-9 OS=Gallus gallus GN=MYH9 PE=4 SV=2	570	226497	44.7	8598	1	1	1	6218031	0
4	1	2::F1NCD4_CHICK	Myosin-9 OS=Gallus gallus GN=MYH9 PE=4 SV=2	570	226497	44.7	8695	1	1	0	4198989	1
4	1	2::F1NCD4_CHICK	Myosin-9 OS=Gallus gallus GN=MYH9 PE=4 SV=2	570	226497	44.7	8696	1	1	0	6293448	1
4	1	2::F1NCD4_CHICK	Myosin-9 OS=Gallus gallus GN=MYH9 PE=4 SV=2	570	226497	44.7	8795	1	1	1	4242393	0
4	1	2::F1NCD4_CHICK	Myosin-9 OS=Gallus gallus GN=MYH9 PE=4 SV=2	570	226497	44.7	8796	1	1	1	6358554	0
4	1	2::F1NCD4_CHICK	Myosin-9 OS=Gallus gallus GN=MYH9 PE=4 SV=2	570	226497	44.7	8837	1	1	1	6397807	0
4	1	2::F1NCD4_CHICK	Myosin-9 OS=Gallus gallus GN=MYH9 PE=4 SV=2	570	226497	44.7	9016	1	1	1	6533398	0
4	1	2::F1NCD4_CHICK	Myosin-9 OS=Gallus gallus GN=MYH9 PE=4 SV=2	570	226497	44.7	9017	1	1	1	6533400	0
4	1	2::F1NCD4_CHICK	Myosin-9 OS=Gallus gallus GN=MYH9 PE=4 SV=2	570	226497	44.7	9149	1	1	0	4402554	0
4	1	2::F1NCD4_CHICK	Myosin-9 OS=Gallus gallus GN=MYH9 PE=4 SV=2	570	226497	44.7	9150	1	1	0	4402555	0
4	1	2::F1NCD4_CHICK	Myosin-9 OS=Gallus gallus GN=MYH9 PE=4 SV=2	570	226497	44.7	9259	1	1	1	6663084	0
4	1	2::F1NCD4_CHICK	Myosin-9 OS=Gallus gallus GN=MYH9 PE=4 SV=2	570	226497	44.7	9350	1	1	1	4488847	0
4	1	2::F1NCD4_CHICK	Myosin-9 OS=Gallus gallus GN=MYH9 PE=4 SV=2	570	226497	44.7	9696	1	1	1	6947874	0
4	1	2::F1NCD4_CHICK	Myosin-9 OS=Gallus gallus GN=MYH9 PE=4 SV=2	570	226497	44.7	9703	1	1	1	6953295	1
4	1	2::F1NCD4_CHICK	Myosin-9 OS=Gallus gallus GN=MYH9 PE=4 SV=2	570	226497	44.7	9737	2	1	1	6973600	1
4	1	2::F1NCD4_CHICK	Myosin-9 OS=Gallus gallus GN=MYH9 PE=4 SV=2	570	226497	44.7	9771	1	1	1	4669371	1
4	1	2::F1NCD4_CHICK	Myosin-9 OS=Gallus gallus GN=MYH9 PE=4 SV=2	570	226497	44.7	10285	1	1	1	7354089	0
4	1	2::F1NCD4_CHICK	Myosin-9 OS=Gallus gallus GN=MYH9 PE=4 SV=2	570	226497	44.7	10286	1	1	1	4906088	0
4	1	2::F1NCD4_CHICK	Myosin-9 OS=Gallus gallus GN=MYH9 PE=4 SV=2	570	226497	44.7	10393	1	1	1	7439548	0
4	1	2::F1NCD4_CHICK	Myosin-9 OS=Gallus gallus GN=MYH9 PE=4 SV=2	570	226497	44.7	10394	1	1	1	4963058	0
4	1	2::F1NCD4_CHICK	Myosin-9 OS=Gallus gallus GN=MYH9 PE=4 SV=2	570	226497	44.7	10857	1	1	1	7763355	0
4	1	2::F1NCD4_CHICK	Myosin-9 OS=Gallus gallus GN=MYH9 PE=4 SV=2	570	226497	44.7	10858	1	1	1	5178928	0
4	1	2::F1NCD4_CHICK	Myosin-9 OS=Gallus gallus GN=MYH9 PE=4 SV=2	570	226497	44.7	10888	1	1	1	7784252	0
4	1	2::F1NCD4_CHICK	Myosin-9 OS=Gallus gallus GN=MYH9 PE=4 SV=2	570	226497	44.7	10889	1	1	1	7784255	0
4	1	2::F1NCD4_CHICK	Myosin-9 OS=Gallus gallus GN=MYH9 PE=4 SV=2	570	226497	44.7	10890	1	1	1	5192862	0
4	1	2::F1NCD4_CHICK	Myosin-9 OS=Gallus gallus GN=MYH9 PE=4 SV=2	570	226497	44.7	10891	1	1	1	5192864	0
4	1	2::F1NCD4_CHICK	Myosin-9 OS=Gallus gallus GN=MYH9 PE=4 SV=2	570	226497	44.7	11033	1	1	1	7864312	0
4	1	2::F1NCD4_CHICK	Myosin-9 OS=Gallus gallus GN=MYH9 PE=4 SV=2	570	226497	44.7	11034	1	1	1	5246240	0
4	1	2::F1NCD4_CHICK	Myosin-9 OS=Gallus gallus GN=MYH9 PE=4 SV=2	570	226497	44.7	11035	1	1	1	5246246	0
4	1	2::F1NCD4_CHICK	Myosin-9 OS=Gallus gallus GN=MYH9 PE=4 SV=2	570	226497	44.7	11065	1	1	1	5259377	0
4	1	2::F1NCD4_CHICK	Myosin-9 OS=Gallus gallus GN=MYH9 PE=4 SV=2	570	226497	44.7	11066	1	1	1	7884031	0
4	1	2::F1NCD4_CHICK	Myosin-9 OS=Gallus gallus GN=MYH9 PE=4 SV=2	570	226497	44.7	11215	1	1	1	7963556	0
4	1	2::F1NCD4_CHICK	Myosin-9 OS=Gallus gallus GN=MYH9 PE=4 SV=2	570	226497	44.7	11560	1	1	1	5476198	0
4	1	2::F1NCD4_CHICK	Myosin-9 OS=Gallus gallus GN=MYH9 PE=4 SV=2	570	226497	44.7	11562	1	1	1	5479470	0
4	1	2::F1NCD4_CHICK	Myosin-9 OS=Gallus gallus GN=MYH9 PE=4 SV=2	570	226497	44.7	11563	1	1	1	5479477	0
4	1	2::F1NCD4_CHICK	Myosin-9 OS=Gallus gallus GN=MYH9 PE=4 SV=2	570	226497	44.7	11671	1	1	1	8289400	0
4	1	2::F1NCD4_CHICK	Myosin-9 OS=Gallus gallus GN=MYH9 PE=4 SV=2	570	226497	44.7	11672	1	1	1	5529629	0
4	1	2::F1NCD4_CHICK	Myosin-9 OS=Gallus gallus GN=MYH9 PE=4 SV=2	570	226497	44.7	11737	1	1	1	8349406	0
4	1	2::F1NCD4_CHICK	Myosin-9 OS=Gallus gallus GN=MYH9 PE=4 SV=2	570	226497	44.7	11738	1	1	1	5569634	0
4	1	2::F1NCD4_CHICK	Myosin-9 OS=Gallus gallus GN=MYH9 PE=4 SV=2	570	226497	44.7	11854	1	1	1	8443738	0
4	1	2::F1NCD4_CHICK	Myosin-9 OS=Gallus gallus GN=MYH9 PE=4 SV=2	570	226497	44.7	11969	1	1	1	8519066	0
4	1	2::F1NCD4_CHICK	Myosin-9 OS=Gallus gallus GN=MYH9 PE=4 SV=2	570	226497	44.7	12186	1	1	1	5763223	0
4	1	2::F1NCD4_CHICK	Myosin-9 OS=Gallus gallus GN=MYH9 PE=4 SV=2	570	226497	44.7	12187	1	1	1	5763231	0
4	1	2::F1NCD4_CHICK	Myosin-9 OS=Gallus gallus GN=MYH9 PE=4 SV=2	570	226497	44.7	12188	1	1	1	8639836	0
4	1	2::F1NCD4_CHICK	Myosin-9 OS=Gallus gallus GN=MYH9 PE=4 SV=2	570	226497	44.7	12195	1	1	1	8644336	0
4	1	2::F1NCD4_CHICK	Myosin-9 OS=Gallus gallus GN=MYH9 PE=4 SV=2	570	226497	44.7	12196	1	1	1	5766252	0
4	1	2::F1NCD4_CHICK	Myosin-9 OS=Gallus gallus GN=MYH9 PE=4 SV=2	570	226497	44.7	12197	1	1	1	8644343	0
4	1	2::F1NCD4_CHICK	Myosin-9 OS=Gallus gallus GN=MYH9 PE=4 SV=2	570	226497	44.7	12383	1	1	1	5859499	0
4	1	2::F1NCD4_CHICK	Myosin-9 OS=Gallus gallus GN=MYH9 PE=4 SV=2	570	226497	44.7	12384	1	1	1	8784217	0
4	1	2::F1NCD4_CHICK	Myosin-9 OS=Gallus gallus GN=MYH9 PE=4 SV=2	570	226497	44.7	12525	1	1	1	5956606	1
4	1	2::F1NCD4_CHICK	Myosin-9 OS=Gallus gallus GN=MYH9 PE=4 SV=2	570	226497	44.7	12526	1	1	1	5956608	1
4	1	2::F1NCD4_CHICK	Myosin-9 OS=Gallus gallus GN=MYH9 PE=4 SV=2	570	226497	44.7	12687	1	1	1	6059616	0
4	1	2::F1NCD4_CHICK	Myosin-9 OS=Gallus gallus GN=MYH9 PE=4 SV=2	570	226497	44.7	12689	1	1	1	9084400	0
4	1	2::F1NCD4_CHICK	Myosin-9 OS=Gallus gallus GN=MYH9 PE=4 SV=2	570	226497	44.7	12932	1	1	1	6186475	0
4	1	2::F1NCD4_CHICK	Myosin-9 OS=Gallus gallus GN=MYH9 PE=4 SV=2	570	226497	44.7	12933	1	1	1	6186479	0
4	1	2::F1NCD4_CHICK	Myosin-9 OS=Gallus gallus GN=MYH9 PE=4 SV=2	570	226497	44.7	12934	1	1	1	6186481	0
4	1	2::F1NCD4_CHICK	Myosin-9 OS=Gallus gallus GN=MYH9 PE=4 SV=2	570	226497	44.7	13169	1	1	1	6366552	0
4	1	2::F1NCD4_CHICK	Myosin-9 OS=Gallus gallus GN=MYH9 PE=4 SV=2	570	226497	44.7	13170	1	1	1	6366552	0
4	1	2::F1NCD4_CHICK	Myosin-9 OS=Gallus gallus GN=MYH9 PE=4 SV=2	570	226497	44.7	13205	1	1	1	6406469	0
4	1	2::F1NCD4_CHICK	Myosin-9 OS=Gallus gallus GN=MYH9 PE=4 SV=2	570	226497	44.7	13206	1	1	1	9604667	0
4	1	2::F1NCD4_CHICK	Myosin-9 OS=Gallus gallus GN=MYH9 PE=4 SV=2	570	226497	44.7	13207	1	1	1	6406475	0
4	1	2::F1NCD4_CHICK	Myosin-9 OS=Gallus gallus GN=MYH9 PE=4 SV=2	570	226497	44.7	13426	1	1	0	9814644	0
4	1	2::F1NCD4_CHICK	Myosin-9 OS=Gallus gallus GN=MYH9 PE=4 SV=2	570	226497	44.7	13427	1	1	0	6546456	0
4	1	2::F1NCD4_CHICK	Myosin-9 OS=Gallus gallus GN=MYH9 PE=4 SV=2	570	226497	44.7	13428	1	1	0	9814649	0
4	1	2::F1NCD4_CHICK	Myosin-9 OS=Gallus gallus GN=MYH9 PE=4 SV=2	570	226497	44.7	13429	1	1	0	6546457	0
4	1	2::F1NCD4_CHICK	Myosin-9 OS=Gallus gallus GN=MYH9 PE=4 SV=2	570	226497	44.7	13460	1	1	1	9870139	0
4	1	2::F1NCD4_CHICK	Myosin-9 OS=Gallus gallus GN=MYH9 PE=4 SV=2	570	226497	44.7	13461	1	1	1	6583455	0
4	1	2::F1NCD4_CHICK	Myosin-9 OS=Gallus gallus GN=MYH9 PE=4 SV=2	570	226497	44.7	13564	1	1	1	4997650	0
4	1	2::F1NCD4_CHICK	Myosin-9 OS=Gallus gallus GN=MYH9 PE=4 SV=2	570	226497	44.7	13596	1	1	1	6686887	0
4	1	2::F1NCD4_CHICK	Myosin-9 OS=Gallus gallus GN=MYH9 PE=4 SV=2	570	226497	44.7	13597	1	1	1	6686893	0
4	1	2::F1NCD4_CHICK	Myosin-9 OS=Gallus gallus GN=MYH9 PE=4 SV=2	570	226497	44.7	13598	1	1	1	10025305	0
4	1	2::F1NCD4_CHICK	Myosin-9 OS=Gallus gallus GN=MYH9 PE=4 SV=2	570	226497	44.7	13742	1	1	1	6833293	0
4	1	2::F1NCD4_CHICK	Myosin-9 OS=Gallus gallus GN=MYH9 PE=4 SV=2	570	226497	44.7	13743	1	1	1	10244904	0
4	1	2::F1NCD4_CHICK	Myosin-9 OS=Gallus gallus GN=MYH9 PE=4 SV=2	570	226497	44.7	13744	1	1	1	10244906	0
4	1	2::F1NCD4_CHICK	Myosin-9 OS=Gallus gallus GN=MYH9 PE=4 SV=2	570	226497	44.7	13745	1	1	1	6833298	0
4	1	2::F1NCD4_CHICK	Myosin-9 OS=Gallus gallus GN=MYH9 PE=4 SV=2	570	226497	44.7	13748	1	1	1	10249871	0
4	1	2::F1NCD4_CHICK	Myosin-9 OS=Gallus gallus GN=MYH9 PE=4 SV=2	570	226497	44.7	13749	1	1	1	6836612	0
4	1	2::F1NCD4_CHICK	Myosin-9 OS=Gallus gallus GN=MYH9 PE=4 SV=2	570	226497	44.7	13750	1	1	1	6836613	0
4	1	2::F1NCD4_CHICK	Myosin-9 OS=Gallus gallus GN=MYH9 PE=4 SV=2	570	226497	44.7	13752	1	1	1	6836616	0
4	1	2::F1NCD4_CHICK	Myosin-9 OS=Gallus gallus GN=MYH9 PE=4 SV=2	570	226497	44.7	13753	1	1	1	10249904	0
4	1	2::F1NCD4_CHICK	Myosin-9 OS=Gallus gallus GN=MYH9 PE=4 SV=2	570	226497	44.7	14039	1	1	1	7093452	0
4	1	2::F1NCD4_CHICK	Myosin-9 OS=Gallus gallus GN=MYH9 PE=4 SV=2	570	226497	44.7	14040	1	1	1	7093458	0
4	1	2::F1NCD4_CHICK	Myosin-9 OS=Gallus gallus GN=MYH9 PE=4 SV=2	570	226497	44.7	14126	1	1	1	7146777	0
4	1	2::F1NCD4_CHICK	Myosin-9 OS=Gallus gallus GN=MYH9 PE=4 SV=2	570	226497	44.7	14718	1	1	1	7783585	0
4	1	2::F1NCD4_CHICK	Myosin-9 OS=Gallus gallus GN=MYH9 PE=4 SV=2	570	226497	44.7	14994	1	1	1	8247303	0
4	1	2::F1NCD4_CHICK	Myosin-9 OS=Gallus gallus GN=MYH9 PE=4 SV=2	570	226497	44.7	14995	1	1	1	8247316	0
4	1	2::F1NCD4_CHICK	Myosin-9 OS=Gallus gallus GN=MYH9 PE=4 SV=2	570	226497	44.7	15014	1	1	1	6208013	0
4	1	2::F1NCD4_CHICK	Myosin-9 OS=Gallus gallus GN=MYH9 PE=4 SV=2	570	226497	44.7	15015	1	1	1	8274000	0
4	1	2::F1NCD4_CHICK	Myosin-9 OS=Gallus gallus GN=MYH9 PE=4 SV=2	570	226497	44.7	15016	1	1	1	8274000	0
4	1	2::F1NCD4_CHICK	Myosin-9 OS=Gallus gallus GN=MYH9 PE=4 SV=2	570	226497	44.7	15017	1	1	1	8274005	0
4	1	2::F1NCD4_CHICK	Myosin-9 OS=Gallus gallus GN=MYH9 PE=4 SV=2	570	226497	44.7	15018	1	1	1	12405978	0
4	1	2::F1NCD4_CHICK	Myosin-9 OS=Gallus gallus GN=MYH9 PE=4 SV=2	570	226497	44.7	15103	1	1	1	8417591	0
4	1	2::F1NCD4_CHICK	Myosin-9 OS=Gallus gallus GN=MYH9 PE=4 SV=2	570	226497	44.7	15104	1	1	1	8417597	0
4	1	2::F1NCD4_CHICK	Myosin-9 OS=Gallus gallus GN=MYH9 PE=4 SV=2	570	226497	44.7	15106	1	1	1	6315725	0
4	1	2::F1NCD4_CHICK	Myosin-9 OS=Gallus gallus GN=MYH9 PE=4 SV=2	570	226497	44.7	15282	1	1	1	6635956	1
4	1	2::F1NCD4_CHICK	Myosin-9 OS=Gallus gallus GN=MYH9 PE=4 SV=2	570	226497	44.7	15284	1	1	1	6635960	1	emPAI	0.45
4	2	2::Q02015_CHICK	Nonmuscle myosin heavy chain OS=Gallus gallus PE=2 SV=2	232	231322	33.4	2348	4	0	0	3096584	0
4	2	2::Q02015_CHICK	Nonmuscle myosin heavy chain OS=Gallus gallus PE=2 SV=2	232	231322	33.4	2607	1	0	0	3201775	1
4	2	2::Q02015_CHICK	Nonmuscle myosin heavy chain OS=Gallus gallus PE=2 SV=2	232	231322	33.4	2881	1	0	0	3341562	0
4	2	2::Q02015_CHICK	Nonmuscle myosin heavy chain OS=Gallus gallus PE=2 SV=2	232	231322	33.4	3739	6	0	1	3736883	0
4	2	2::Q02015_CHICK	Nonmuscle myosin heavy chain OS=Gallus gallus PE=2 SV=2	232	231322	33.4	4540	5	0	1	4162425	1
4	2	2::Q02015_CHICK	Nonmuscle myosin heavy chain OS=Gallus gallus PE=2 SV=2	232	231322	33.4	5369	1	0	0	4467166	0
4	2	2::Q02015_CHICK	Nonmuscle myosin heavy chain OS=Gallus gallus PE=2 SV=2	232	231322	33.4	5375	1	0	1	4467515	0
4	2	2::Q02015_CHICK	Nonmuscle myosin heavy chain OS=Gallus gallus PE=2 SV=2	232	231322	33.4	5743	1	0	0	4602051	0
4	2	2::Q02015_CHICK	Nonmuscle myosin heavy chain OS=Gallus gallus PE=2 SV=2	232	231322	33.4	5967	1	0	1	4697599	0
4	2	2::Q02015_CHICK	Nonmuscle myosin heavy chain OS=Gallus gallus PE=2 SV=2	232	231322	33.4	6203	1	0	1	4802517	0
4	2	2::Q02015_CHICK	Nonmuscle myosin heavy chain OS=Gallus gallus PE=2 SV=2	232	231322	33.4	6323	1	0	1	4872655	0
4	2	2::Q02015_CHICK	Nonmuscle myosin heavy chain OS=Gallus gallus PE=2 SV=2	232	231322	33.4	6546	1	0	1	5002864	0
4	2	2::Q02015_CHICK	Nonmuscle myosin heavy chain OS=Gallus gallus PE=2 SV=2	232	231322	33.4	6567	2	0	1	5017779	0
4	2	2::Q02015_CHICK	Nonmuscle myosin heavy chain OS=Gallus gallus PE=2 SV=2	232	231322	33.4	6568	2	0	1	5017783	1
4	2	2::Q02015_CHICK	Nonmuscle myosin heavy chain OS=Gallus gallus PE=2 SV=2	232	231322	33.4	6943	2	0	1	5237810	1
4	2	2::Q02015_CHICK	Nonmuscle myosin heavy chain OS=Gallus gallus PE=2 SV=2	232	231322	33.4	7631	1	0	0	5652975	0
4	2	2::Q02015_CHICK	Nonmuscle myosin heavy chain OS=Gallus gallus PE=2 SV=2	232	231322	33.4	7764	1	0	1	5737993	0
4	2	2::Q02015_CHICK	Nonmuscle myosin heavy chain OS=Gallus gallus PE=2 SV=2	232	231322	33.4	7765	1	0	1	5738000	0
4	2	2::Q02015_CHICK	Nonmuscle myosin heavy chain OS=Gallus gallus PE=2 SV=2	232	231322	33.4	8132	1	0	1	5942989	0
4	2	2::Q02015_CHICK	Nonmuscle myosin heavy chain OS=Gallus gallus PE=2 SV=2	232	231322	33.4	8364	1	0	1	6083336	0
4	2	2::Q02015_CHICK	Nonmuscle myosin heavy chain OS=Gallus gallus PE=2 SV=2	232	231322	33.4	8448	1	0	0	4085518	0
4	2	2::Q02015_CHICK	Nonmuscle myosin heavy chain OS=Gallus gallus PE=2 SV=2	232	231322	33.4	8449	1	0	0	4085521	0
4	2	2::Q02015_CHICK	Nonmuscle myosin heavy chain OS=Gallus gallus PE=2 SV=2	232	231322	33.4	8519	1	0	1	6167862	0
4	2	2::Q02015_CHICK	Nonmuscle myosin heavy chain OS=Gallus gallus PE=2 SV=2	232	231322	33.4	8531	1	0	1	6177853	0
4	2	2::Q02015_CHICK	Nonmuscle myosin heavy chain OS=Gallus gallus PE=2 SV=2	232	231322	33.4	8555	1	0	1	4132152	0
4	2	2::Q02015_CHICK	Nonmuscle myosin heavy chain OS=Gallus gallus PE=2 SV=2	232	231322	33.4	8695	1	0	0	4198989	1
4	2	2::Q02015_CHICK	Nonmuscle myosin heavy chain OS=Gallus gallus PE=2 SV=2	232	231322	33.4	8696	1	0	0	6293448	1
4	2	2::Q02015_CHICK	Nonmuscle myosin heavy chain OS=Gallus gallus PE=2 SV=2	232	231322	33.4	8930	1	0	1	6463315	0
4	2	2::Q02015_CHICK	Nonmuscle myosin heavy chain OS=Gallus gallus PE=2 SV=2	232	231322	33.4	9149	1	0	0	4402554	0
4	2	2::Q02015_CHICK	Nonmuscle myosin heavy chain OS=Gallus gallus PE=2 SV=2	232	231322	33.4	9150	1	0	0	4402555	0
4	2	2::Q02015_CHICK	Nonmuscle myosin heavy chain OS=Gallus gallus PE=2 SV=2	232	231322	33.4	9571	1	0	1	6868533	0
4	2	2::Q02015_CHICK	Nonmuscle myosin heavy chain OS=Gallus gallus PE=2 SV=2	232	231322	33.4	9576	1	0	1	6873441	0
4	2	2::Q02015_CHICK	Nonmuscle myosin heavy chain OS=Gallus gallus PE=2 SV=2	232	231322	33.4	10063	1	0	1	7208613	0
4	2	2::Q02015_CHICK	Nonmuscle myosin heavy chain OS=Gallus gallus PE=2 SV=2	232	231322	33.4	10629	1	0	1	7603489	0
4	2	2::Q02015_CHICK	Nonmuscle myosin heavy chain OS=Gallus gallus PE=2 SV=2	232	231322	33.4	10687	1	0	1	7648984	0
4	2	2::Q02015_CHICK	Nonmuscle myosin heavy chain OS=Gallus gallus PE=2 SV=2	232	231322	33.4	11349	1	0	1	5376067	0
4	2	2::Q02015_CHICK	Nonmuscle myosin heavy chain OS=Gallus gallus PE=2 SV=2	232	231322	33.4	11601	1	0	1	8238916	0
4	2	2::Q02015_CHICK	Nonmuscle myosin heavy chain OS=Gallus gallus PE=2 SV=2	232	231322	33.4	11621	1	0	1	8249227	0
4	2	2::Q02015_CHICK	Nonmuscle myosin heavy chain OS=Gallus gallus PE=2 SV=2	232	231322	33.4	11784	1	0	1	8389382	0
4	2	2::Q02015_CHICK	Nonmuscle myosin heavy chain OS=Gallus gallus PE=2 SV=2	232	231322	33.4	11866	1	0	1	8459179	0
4	2	2::Q02015_CHICK	Nonmuscle myosin heavy chain OS=Gallus gallus PE=2 SV=2	232	231322	33.4	12274	1	0	1	4354807	1
4	2	2::Q02015_CHICK	Nonmuscle myosin heavy chain OS=Gallus gallus PE=2 SV=2	232	231322	33.4	12275	1	0	1	5803052	1
4	2	2::Q02015_CHICK	Nonmuscle myosin heavy chain OS=Gallus gallus PE=2 SV=2	232	231322	33.4	12276	1	0	1	5803054	1
4	2	2::Q02015_CHICK	Nonmuscle myosin heavy chain OS=Gallus gallus PE=2 SV=2	232	231322	33.4	12277	1	0	1	5803054	1
4	2	2::Q02015_CHICK	Nonmuscle myosin heavy chain OS=Gallus gallus PE=2 SV=2	232	231322	33.4	12278	1	0	1	4354810	1
4	2	2::Q02015_CHICK	Nonmuscle myosin heavy chain OS=Gallus gallus PE=2 SV=2	232	231322	33.4	12301	1	0	1	5816544	0
4	2	2::Q02015_CHICK	Nonmuscle myosin heavy chain OS=Gallus gallus PE=2 SV=2	232	231322	33.4	12333	1	0	1	8739493	0
4	2	2::Q02015_CHICK	Nonmuscle myosin heavy chain OS=Gallus gallus PE=2 SV=2	232	231322	33.4	12334	1	0	1	5829690	0
4	2	2::Q02015_CHICK	Nonmuscle myosin heavy chain OS=Gallus gallus PE=2 SV=2	232	231322	33.4	12381	1	0	1	8779432	0
4	2	2::Q02015_CHICK	Nonmuscle myosin heavy chain OS=Gallus gallus PE=2 SV=2	232	231322	33.4	12382	1	0	1	5856327	0
4	2	2::Q02015_CHICK	Nonmuscle myosin heavy chain OS=Gallus gallus PE=2 SV=2	232	231322	33.4	12595	1	0	1	5996404	0
4	2	2::Q02015_CHICK	Nonmuscle myosin heavy chain OS=Gallus gallus PE=2 SV=2	232	231322	33.4	12596	1	0	1	8989578	0
4	2	2::Q02015_CHICK	Nonmuscle myosin heavy chain OS=Gallus gallus PE=2 SV=2	232	231322	33.4	12597	1	0	1	5996412	0
4	2	2::Q02015_CHICK	Nonmuscle myosin heavy chain OS=Gallus gallus PE=2 SV=2	232	231322	33.4	13267	1	0	1	6443266	0
4	2	2::Q02015_CHICK	Nonmuscle myosin heavy chain OS=Gallus gallus PE=2 SV=2	232	231322	33.4	13268	1	0	1	9659865	0
4	2	2::Q02015_CHICK	Nonmuscle myosin heavy chain OS=Gallus gallus PE=2 SV=2	232	231322	33.4	13269	1	0	1	6443270	0
4	2	2::Q02015_CHICK	Nonmuscle myosin heavy chain OS=Gallus gallus PE=2 SV=2	232	231322	33.4	13270	1	0	1	9659871	0
4	2	2::Q02015_CHICK	Nonmuscle myosin heavy chain OS=Gallus gallus PE=2 SV=2	232	231322	33.4	13286	1	0	1	9674731	0
4	2	2::Q02015_CHICK	Nonmuscle myosin heavy chain OS=Gallus gallus PE=2 SV=2	232	231322	33.4	13287	1	0	1	6453184	0
4	2	2::Q02015_CHICK	Nonmuscle myosin heavy chain OS=Gallus gallus PE=2 SV=2	232	231322	33.4	13352	1	0	1	4870156	0
4	2	2::Q02015_CHICK	Nonmuscle myosin heavy chain OS=Gallus gallus PE=2 SV=2	232	231322	33.4	13426	1	0	0	9814644	0
4	2	2::Q02015_CHICK	Nonmuscle myosin heavy chain OS=Gallus gallus PE=2 SV=2	232	231322	33.4	13427	1	0	0	6546456	0
4	2	2::Q02015_CHICK	Nonmuscle myosin heavy chain OS=Gallus gallus PE=2 SV=2	232	231322	33.4	13428	1	0	0	9814649	0
4	2	2::Q02015_CHICK	Nonmuscle myosin heavy chain OS=Gallus gallus PE=2 SV=2	232	231322	33.4	13429	1	0	0	6546457	0
4	2	2::Q02015_CHICK	Nonmuscle myosin heavy chain OS=Gallus gallus PE=2 SV=2	232	231322	33.4	13439	1	0	1	6566557	0
4	2	2::Q02015_CHICK	Nonmuscle myosin heavy chain OS=Gallus gallus PE=2 SV=2	232	231322	33.4	13440	1	0	1	6566560	0
4	2	2::Q02015_CHICK	Nonmuscle myosin heavy chain OS=Gallus gallus PE=2 SV=2	232	231322	33.4	13441	1	0	1	6566563	0
4	2	2::Q02015_CHICK	Nonmuscle myosin heavy chain OS=Gallus gallus PE=2 SV=2	232	231322	33.4	13458	1	0	1	6583297	0
4	2	2::Q02015_CHICK	Nonmuscle myosin heavy chain OS=Gallus gallus PE=2 SV=2	232	231322	33.4	13459	1	0	1	6583308	0
4	2	2::Q02015_CHICK	Nonmuscle myosin heavy chain OS=Gallus gallus PE=2 SV=2	232	231322	33.4	13694	1	0	1	10170149	0
4	2	2::Q02015_CHICK	Nonmuscle myosin heavy chain OS=Gallus gallus PE=2 SV=2	232	231322	33.4	13696	1	0	1	6783464	0
4	2	2::Q02015_CHICK	Nonmuscle myosin heavy chain OS=Gallus gallus PE=2 SV=2	232	231322	33.4	13697	1	0	1	6783465	0
4	2	2::Q02015_CHICK	Nonmuscle myosin heavy chain OS=Gallus gallus PE=2 SV=2	232	231322	33.4	13785	1	0	1	6863283	0
4	2	2::Q02015_CHICK	Nonmuscle myosin heavy chain OS=Gallus gallus PE=2 SV=2	232	231322	33.4	13827	1	0	1	10355451	0
4	2	2::Q02015_CHICK	Nonmuscle myosin heavy chain OS=Gallus gallus PE=2 SV=2	232	231322	33.4	13828	1	0	1	6906997	0
4	2	2::Q02015_CHICK	Nonmuscle myosin heavy chain OS=Gallus gallus PE=2 SV=2	232	231322	33.4	13829	1	0	1	6906998	0
4	2	2::Q02015_CHICK	Nonmuscle myosin heavy chain OS=Gallus gallus PE=2 SV=2	232	231322	33.4	13976	1	0	1	7046738	0
4	2	2::Q02015_CHICK	Nonmuscle myosin heavy chain OS=Gallus gallus PE=2 SV=2	232	231322	33.4	13977	1	0	1	7046741	0
4	2	2::Q02015_CHICK	Nonmuscle myosin heavy chain OS=Gallus gallus PE=2 SV=2	232	231322	33.4	14875	1	0	1	8020564	0
4	2	2::Q02015_CHICK	Nonmuscle myosin heavy chain OS=Gallus gallus PE=2 SV=2	232	231322	33.4	14876	1	0	1	12025832	0
4	2	2::Q02015_CHICK	Nonmuscle myosin heavy chain OS=Gallus gallus PE=2 SV=2	232	231322	33.4	14942	1	0	1	8127363	0
4	2	2::Q02015_CHICK	Nonmuscle myosin heavy chain OS=Gallus gallus PE=2 SV=2	232	231322	33.4	15147	1	0	1	8494052	0
4	2	2::Q02015_CHICK	Nonmuscle myosin heavy chain OS=Gallus gallus PE=2 SV=2	232	231322	33.4	15373	1	0	1	6828546	1
4	2	2::Q02015_CHICK	Nonmuscle myosin heavy chain OS=Gallus gallus PE=2 SV=2	232	231322	33.4	15374	1	0	1	9101377	1
4	2	2::Q02015_CHICK	Nonmuscle myosin heavy chain OS=Gallus gallus PE=2 SV=2	232	231322	33.4	15376	1	0	1	6831044	1
4	2	2::Q02015_CHICK	Nonmuscle myosin heavy chain OS=Gallus gallus PE=2 SV=2	232	231322	33.4	15377	1	0	1	9104722	1	emPAI	0.24
4		2::E1BXA5_CHICK	Myosin-11 OS=Gallus gallus GN=MYH11 PE=4 SV=2	57	209961	5.9	2607	1	0	0	3201775	1
4		2::E1BXA5_CHICK	Myosin-11 OS=Gallus gallus GN=MYH11 PE=4 SV=2	57	209961	5.9	5967	1	0	1	4697599	0
4		2::E1BXA5_CHICK	Myosin-11 OS=Gallus gallus GN=MYH11 PE=4 SV=2	57	209961	5.9	6039	1	0	1	4732676	0
4		2::E1BXA5_CHICK	Myosin-11 OS=Gallus gallus GN=MYH11 PE=4 SV=2	57	209961	5.9	6323	1	0	1	4872655	0
4		2::E1BXA5_CHICK	Myosin-11 OS=Gallus gallus GN=MYH11 PE=4 SV=2	57	209961	5.9	7631	1	0	0	5652975	0
4		2::E1BXA5_CHICK	Myosin-11 OS=Gallus gallus GN=MYH11 PE=4 SV=2	57	209961	5.9	7764	1	0	1	5737993	0
4		2::E1BXA5_CHICK	Myosin-11 OS=Gallus gallus GN=MYH11 PE=4 SV=2	57	209961	5.9	7765	1	0	1	5738000	0
4		2::E1BXA5_CHICK	Myosin-11 OS=Gallus gallus GN=MYH11 PE=4 SV=2	57	209961	5.9	8695	1	0	0	4198989	1
4		2::E1BXA5_CHICK	Myosin-11 OS=Gallus gallus GN=MYH11 PE=4 SV=2	57	209961	5.9	8696	1	0	0	6293448	1
4		2::E1BXA5_CHICK	Myosin-11 OS=Gallus gallus GN=MYH11 PE=4 SV=2	57	209961	5.9	9016	1	0	1	6533398	0
4		2::E1BXA5_CHICK	Myosin-11 OS=Gallus gallus GN=MYH11 PE=4 SV=2	57	209961	5.9	9017	1	0	1	6533400	0
4		2::E1BXA5_CHICK	Myosin-11 OS=Gallus gallus GN=MYH11 PE=4 SV=2	57	209961	5.9	11215	1	0	1	7963556	0
4		2::E1BXA5_CHICK	Myosin-11 OS=Gallus gallus GN=MYH11 PE=4 SV=2	57	209961	5.9	12186	1	0	1	5763223	0
4		2::E1BXA5_CHICK	Myosin-11 OS=Gallus gallus GN=MYH11 PE=4 SV=2	57	209961	5.9	12187	1	0	1	5763231	0
4		2::E1BXA5_CHICK	Myosin-11 OS=Gallus gallus GN=MYH11 PE=4 SV=2	57	209961	5.9	12188	1	0	1	8639836	0
4		2::E1BXA5_CHICK	Myosin-11 OS=Gallus gallus GN=MYH11 PE=4 SV=2	57	209961	5.9	12314	1	0	1	5819463	1
4		2::Q9PSW1_CHICK	Nonmuscle myosin II heavy chain-B (Fragment) OS=Gallus gallus PE=4 SV=1	48	7504	40.3	5375	1	0	1	4467515	0
4		2::Q9PSW1_CHICK	Nonmuscle myosin II heavy chain-B (Fragment) OS=Gallus gallus PE=4 SV=1	48	7504	40.3	13827	1	0	1	10355451	0
4		2::Q9PSW1_CHICK	Nonmuscle myosin II heavy chain-B (Fragment) OS=Gallus gallus PE=4 SV=1	48	7504	40.3	13828	1	0	1	6906997	0
4		2::Q9PSW1_CHICK	Nonmuscle myosin II heavy chain-B (Fragment) OS=Gallus gallus PE=4 SV=1	48	7504	40.3	13829	1	0	1	6906998	0
5	1	2::F1NJ08_CHICK	Vimentin OS=Gallus gallus GN=VIM PE=3 SV=1	520	53183	73.7	2259	1	1	0	3031664	0
5	1	2::F1NJ08_CHICK	Vimentin OS=Gallus gallus GN=VIM PE=3 SV=1	520	53183	73.7	2467	1	1	1	3136485	0
5	1	2::F1NJ08_CHICK	Vimentin OS=Gallus gallus GN=VIM PE=3 SV=1	520	53183	73.7	2553	4	1	1	3161745	0
5	1	2::F1NJ08_CHICK	Vimentin OS=Gallus gallus GN=VIM PE=3 SV=1	520	53183	73.7	2555	1	1	1	3161747	0
5	1	2::F1NJ08_CHICK	Vimentin OS=Gallus gallus GN=VIM PE=3 SV=1	520	53183	73.7	2556	1	1	1	3161747	0
5	1	2::F1NJ08_CHICK	Vimentin OS=Gallus gallus GN=VIM PE=3 SV=1	520	53183	73.7	2557	4	1	1	3161747	0
5	1	2::F1NJ08_CHICK	Vimentin OS=Gallus gallus GN=VIM PE=3 SV=1	520	53183	73.7	2558	1	1	1	3161748	0
5	1	2::F1NJ08_CHICK	Vimentin OS=Gallus gallus GN=VIM PE=3 SV=1	520	53183	73.7	2559	1	1	1	3161748	0
5	1	2::F1NJ08_CHICK	Vimentin OS=Gallus gallus GN=VIM PE=3 SV=1	520	53183	73.7	2588	1	1	0	3181449	0
5	1	2::F1NJ08_CHICK	Vimentin OS=Gallus gallus GN=VIM PE=3 SV=1	520	53183	73.7	2656	1	1	0	3231820	0
5	1	2::F1NJ08_CHICK	Vimentin OS=Gallus gallus GN=VIM PE=3 SV=1	520	53183	73.7	3291	1	1	0	3516805	0
5	1	2::F1NJ08_CHICK	Vimentin OS=Gallus gallus GN=VIM PE=3 SV=1	520	53183	73.7	3299	1	1	0	3521731	0
5	1	2::F1NJ08_CHICK	Vimentin OS=Gallus gallus GN=VIM PE=3 SV=1	520	53183	73.7	4496	1	1	1	4142172	0
5	1	2::F1NJ08_CHICK	Vimentin OS=Gallus gallus GN=VIM PE=3 SV=1	520	53183	73.7	5061	1	1	1	4357221	0
5	1	2::F1NJ08_CHICK	Vimentin OS=Gallus gallus GN=VIM PE=3 SV=1	520	53183	73.7	5062	1	1	1	4357224	0
5	1	2::F1NJ08_CHICK	Vimentin OS=Gallus gallus GN=VIM PE=3 SV=1	520	53183	73.7	5349	1	1	0	4462127	0
5	1	2::F1NJ08_CHICK	Vimentin OS=Gallus gallus GN=VIM PE=3 SV=1	520	53183	73.7	5350	1	1	0	4462128	0
5	1	2::F1NJ08_CHICK	Vimentin OS=Gallus gallus GN=VIM PE=3 SV=1	520	53183	73.7	5351	1	1	0	4462130	0
5	1	2::F1NJ08_CHICK	Vimentin OS=Gallus gallus GN=VIM PE=3 SV=1	520	53183	73.7	5352	1	1	0	4462133	0
5	1	2::F1NJ08_CHICK	Vimentin OS=Gallus gallus GN=VIM PE=3 SV=1	520	53183	73.7	5613	1	1	1	4537380	0
5	1	2::F1NJ08_CHICK	Vimentin OS=Gallus gallus GN=VIM PE=3 SV=1	520	53183	73.7	5614	1	1	1	4537382	0
5	1	2::F1NJ08_CHICK	Vimentin OS=Gallus gallus GN=VIM PE=3 SV=1	520	53183	73.7	5635	1	1	0	4552077	0
5	1	2::F1NJ08_CHICK	Vimentin OS=Gallus gallus GN=VIM PE=3 SV=1	520	53183	73.7	5636	1	1	0	4552079	0
5	1	2::F1NJ08_CHICK	Vimentin OS=Gallus gallus GN=VIM PE=3 SV=1	520	53183	73.7	5658	1	1	0	4562331	0
5	1	2::F1NJ08_CHICK	Vimentin OS=Gallus gallus GN=VIM PE=3 SV=1	520	53183	73.7	5659	1	1	0	3044912	0
5	1	2::F1NJ08_CHICK	Vimentin OS=Gallus gallus GN=VIM PE=3 SV=1	520	53183	73.7	5660	1	1	0	3044912	0
5	1	2::F1NJ08_CHICK	Vimentin OS=Gallus gallus GN=VIM PE=3 SV=1	520	53183	73.7	5661	1	1	0	4562333	0
5	1	2::F1NJ08_CHICK	Vimentin OS=Gallus gallus GN=VIM PE=3 SV=1	520	53183	73.7	5662	1	1	0	3044913	0
5	1	2::F1NJ08_CHICK	Vimentin OS=Gallus gallus GN=VIM PE=3 SV=1	520	53183	73.7	5899	1	1	0	4667383	0
5	1	2::F1NJ08_CHICK	Vimentin OS=Gallus gallus GN=VIM PE=3 SV=1	520	53183	73.7	5900	1	1	0	4667385	0
5	1	2::F1NJ08_CHICK	Vimentin OS=Gallus gallus GN=VIM PE=3 SV=1	520	53183	73.7	5902	1	1	0	4667386	0
5	1	2::F1NJ08_CHICK	Vimentin OS=Gallus gallus GN=VIM PE=3 SV=1	520	53183	73.7	5905	1	1	0	4667388	0
5	1	2::F1NJ08_CHICK	Vimentin OS=Gallus gallus GN=VIM PE=3 SV=1	520	53183	73.7	6729	1	1	0	5122599	0
5	1	2::F1NJ08_CHICK	Vimentin OS=Gallus gallus GN=VIM PE=3 SV=1	520	53183	73.7	6863	1	1	0	3471897	1
5	1	2::F1NJ08_CHICK	Vimentin OS=Gallus gallus GN=VIM PE=3 SV=1	520	53183	73.7	6864	1	1	0	3471898	1
5	1	2::F1NJ08_CHICK	Vimentin OS=Gallus gallus GN=VIM PE=3 SV=1	520	53183	73.7	6939	1	1	1	3495155	0
5	1	2::F1NJ08_CHICK	Vimentin OS=Gallus gallus GN=VIM PE=3 SV=1	520	53183	73.7	7026	1	1	1	5307682	0
5	1	2::F1NJ08_CHICK	Vimentin OS=Gallus gallus GN=VIM PE=3 SV=1	520	53183	73.7	7028	1	1	1	5307682	0
5	1	2::F1NJ08_CHICK	Vimentin OS=Gallus gallus GN=VIM PE=3 SV=1	520	53183	73.7	7029	1	1	1	5307683	0
5	1	2::F1NJ08_CHICK	Vimentin OS=Gallus gallus GN=VIM PE=3 SV=1	520	53183	73.7	7039	1	1	1	5317486	0
5	1	2::F1NJ08_CHICK	Vimentin OS=Gallus gallus GN=VIM PE=3 SV=1	520	53183	73.7	7040	1	1	1	5317491	0
5	1	2::F1NJ08_CHICK	Vimentin OS=Gallus gallus GN=VIM PE=3 SV=1	520	53183	73.7	7041	1	1	1	5317491	0
5	1	2::F1NJ08_CHICK	Vimentin OS=Gallus gallus GN=VIM PE=3 SV=1	520	53183	73.7	7043	1	1	1	5317673	0
5	1	2::F1NJ08_CHICK	Vimentin OS=Gallus gallus GN=VIM PE=3 SV=1	520	53183	73.7	7044	1	1	1	5317674	0
5	1	2::F1NJ08_CHICK	Vimentin OS=Gallus gallus GN=VIM PE=3 SV=1	520	53183	73.7	7180	1	1	1	5397468	0
5	1	2::F1NJ08_CHICK	Vimentin OS=Gallus gallus GN=VIM PE=3 SV=1	520	53183	73.7	7257	1	1	1	5447710	0
5	1	2::F1NJ08_CHICK	Vimentin OS=Gallus gallus GN=VIM PE=3 SV=1	520	53183	73.7	7258	1	1	1	5447714	0
5	1	2::F1NJ08_CHICK	Vimentin OS=Gallus gallus GN=VIM PE=3 SV=1	520	53183	73.7	7303	1	1	0	3651815	0
5	1	2::F1NJ08_CHICK	Vimentin OS=Gallus gallus GN=VIM PE=3 SV=1	520	53183	73.7	7304	1	1	0	5472688	0
5	1	2::F1NJ08_CHICK	Vimentin OS=Gallus gallus GN=VIM PE=3 SV=1	520	53183	73.7	7305	1	1	0	5472694	0
5	1	2::F1NJ08_CHICK	Vimentin OS=Gallus gallus GN=VIM PE=3 SV=1	520	53183	73.7	7490	1	1	1	3725286	0
5	1	2::F1NJ08_CHICK	Vimentin OS=Gallus gallus GN=VIM PE=3 SV=1	520	53183	73.7	7491	1	1	1	5582897	0
5	1	2::F1NJ08_CHICK	Vimentin OS=Gallus gallus GN=VIM PE=3 SV=1	520	53183	73.7	7492	1	1	1	5582900	0
5	1	2::F1NJ08_CHICK	Vimentin OS=Gallus gallus GN=VIM PE=3 SV=1	520	53183	73.7	7506	1	1	1	5587801	0
5	1	2::F1NJ08_CHICK	Vimentin OS=Gallus gallus GN=VIM PE=3 SV=1	520	53183	73.7	7507	1	1	1	5587811	0
5	1	2::F1NJ08_CHICK	Vimentin OS=Gallus gallus GN=VIM PE=3 SV=1	520	53183	73.7	7518	1	1	0	5597795	0
5	1	2::F1NJ08_CHICK	Vimentin OS=Gallus gallus GN=VIM PE=3 SV=1	520	53183	73.7	7519	1	1	0	5597801	0
5	1	2::F1NJ08_CHICK	Vimentin OS=Gallus gallus GN=VIM PE=3 SV=1	520	53183	73.7	7538	1	1	0	5612966	0
5	1	2::F1NJ08_CHICK	Vimentin OS=Gallus gallus GN=VIM PE=3 SV=1	520	53183	73.7	7540	1	1	0	5612971	0
5	1	2::F1NJ08_CHICK	Vimentin OS=Gallus gallus GN=VIM PE=3 SV=1	520	53183	73.7	7669	2	1	0	5677775	0
5	1	2::F1NJ08_CHICK	Vimentin OS=Gallus gallus GN=VIM PE=3 SV=1	520	53183	73.7	7979	1	1	1	3905763	0
5	1	2::F1NJ08_CHICK	Vimentin OS=Gallus gallus GN=VIM PE=3 SV=1	520	53183	73.7	7980	1	1	1	3905765	0
5	1	2::F1NJ08_CHICK	Vimentin OS=Gallus gallus GN=VIM PE=3 SV=1	520	53183	73.7	7981	1	1	1	5853611	0
5	1	2::F1NJ08_CHICK	Vimentin OS=Gallus gallus GN=VIM PE=3 SV=1	520	53183	73.7	7982	1	1	1	5853616	0
5	1	2::F1NJ08_CHICK	Vimentin OS=Gallus gallus GN=VIM PE=3 SV=1	520	53183	73.7	7983	1	1	1	5853618	0
5	1	2::F1NJ08_CHICK	Vimentin OS=Gallus gallus GN=VIM PE=3 SV=1	520	53183	73.7	8676	1	1	1	6277883	0
5	1	2::F1NJ08_CHICK	Vimentin OS=Gallus gallus GN=VIM PE=3 SV=1	520	53183	73.7	8941	1	1	0	6483388	0
5	1	2::F1NJ08_CHICK	Vimentin OS=Gallus gallus GN=VIM PE=3 SV=1	520	53183	73.7	8947	1	1	1	6488084	0
5	1	2::F1NJ08_CHICK	Vimentin OS=Gallus gallus GN=VIM PE=3 SV=1	520	53183	73.7	8948	1	1	1	4328748	0
5	1	2::F1NJ08_CHICK	Vimentin OS=Gallus gallus GN=VIM PE=3 SV=1	520	53183	73.7	8949	1	1	1	6488086	0
5	1	2::F1NJ08_CHICK	Vimentin OS=Gallus gallus GN=VIM PE=3 SV=1	520	53183	73.7	9064	1	1	0	6553082	0
5	1	2::F1NJ08_CHICK	Vimentin OS=Gallus gallus GN=VIM PE=3 SV=1	520	53183	73.7	9065	1	1	0	6553082	0
5	1	2::F1NJ08_CHICK	Vimentin OS=Gallus gallus GN=VIM PE=3 SV=1	520	53183	73.7	10026	1	1	0	4786018	0
5	1	2::F1NJ08_CHICK	Vimentin OS=Gallus gallus GN=VIM PE=3 SV=1	520	53183	73.7	10027	1	1	0	7173993	0
5	1	2::F1NJ08_CHICK	Vimentin OS=Gallus gallus GN=VIM PE=3 SV=1	520	53183	73.7	10028	1	1	0	4786021	0
5	1	2::F1NJ08_CHICK	Vimentin OS=Gallus gallus GN=VIM PE=3 SV=1	520	53183	73.7	10029	1	1	0	7173996	0
5	1	2::F1NJ08_CHICK	Vimentin OS=Gallus gallus GN=VIM PE=3 SV=1	520	53183	73.7	10942	1	1	0	7814472	1
5	1	2::F1NJ08_CHICK	Vimentin OS=Gallus gallus GN=VIM PE=3 SV=1	520	53183	73.7	10943	1	1	0	7814477	1
5	1	2::F1NJ08_CHICK	Vimentin OS=Gallus gallus GN=VIM PE=3 SV=1	520	53183	73.7	10944	1	1	0	5213011	1
5	1	2::F1NJ08_CHICK	Vimentin OS=Gallus gallus GN=VIM PE=3 SV=1	520	53183	73.7	10945	1	1	0	5213013	1
5	1	2::F1NJ08_CHICK	Vimentin OS=Gallus gallus GN=VIM PE=3 SV=1	520	53183	73.7	10946	1	1	0	5213016	1
5	1	2::F1NJ08_CHICK	Vimentin OS=Gallus gallus GN=VIM PE=3 SV=1	520	53183	73.7	11151	1	1	0	7939406	0
5	1	2::F1NJ08_CHICK	Vimentin OS=Gallus gallus GN=VIM PE=3 SV=1	520	53183	73.7	11153	1	1	0	7939420	0
5	1	2::F1NJ08_CHICK	Vimentin OS=Gallus gallus GN=VIM PE=3 SV=1	520	53183	73.7	11154	1	1	0	5296307	0
5	1	2::F1NJ08_CHICK	Vimentin OS=Gallus gallus GN=VIM PE=3 SV=1	520	53183	73.7	11953	1	1	0	8494213	0
5	1	2::F1NJ08_CHICK	Vimentin OS=Gallus gallus GN=VIM PE=3 SV=1	520	53183	73.7	11954	1	1	0	5666170	0
5	1	2::F1NJ08_CHICK	Vimentin OS=Gallus gallus GN=VIM PE=3 SV=1	520	53183	73.7	12824	1	1	0	6129391	0
5	1	2::F1NJ08_CHICK	Vimentin OS=Gallus gallus GN=VIM PE=3 SV=1	520	53183	73.7	12825	1	1	0	6129392	0
5	1	2::F1NJ08_CHICK	Vimentin OS=Gallus gallus GN=VIM PE=3 SV=1	520	53183	73.7	12826	1	1	0	9189052	0
5	1	2::F1NJ08_CHICK	Vimentin OS=Gallus gallus GN=VIM PE=3 SV=1	520	53183	73.7	13717	1	1	1	6799915	0
5	1	2::F1NJ08_CHICK	Vimentin OS=Gallus gallus GN=VIM PE=3 SV=1	520	53183	73.7	13718	1	1	1	6799924	0
5	1	2::F1NJ08_CHICK	Vimentin OS=Gallus gallus GN=VIM PE=3 SV=1	520	53183	73.7	13719	1	1	1	10194852	0
5	1	2::F1NJ08_CHICK	Vimentin OS=Gallus gallus GN=VIM PE=3 SV=1	520	53183	73.7	13720	1	1	1	6799931	0
5	1	2::F1NJ08_CHICK	Vimentin OS=Gallus gallus GN=VIM PE=3 SV=1	520	53183	73.7	13774	1	1	1	6853241	0
5	1	2::F1NJ08_CHICK	Vimentin OS=Gallus gallus GN=VIM PE=3 SV=1	520	53183	73.7	13775	1	1	1	6853252	0
5	1	2::F1NJ08_CHICK	Vimentin OS=Gallus gallus GN=VIM PE=3 SV=1	520	53183	73.7	14289	1	1	0	7296619	0
5	1	2::F1NJ08_CHICK	Vimentin OS=Gallus gallus GN=VIM PE=3 SV=1	520	53183	73.7	14290	1	1	0	7296619	0
5	1	2::F1NJ08_CHICK	Vimentin OS=Gallus gallus GN=VIM PE=3 SV=1	520	53183	73.7	14291	1	1	0	7296624	0
5	1	2::F1NJ08_CHICK	Vimentin OS=Gallus gallus GN=VIM PE=3 SV=1	520	53183	73.7	14292	1	1	0	10939902	0
5	1	2::F1NJ08_CHICK	Vimentin OS=Gallus gallus GN=VIM PE=3 SV=1	520	53183	73.7	14293	1	1	0	10939904	0
5	1	2::F1NJ08_CHICK	Vimentin OS=Gallus gallus GN=VIM PE=3 SV=1	520	53183	73.7	14331	1	1	0	7349934	0
5	1	2::F1NJ08_CHICK	Vimentin OS=Gallus gallus GN=VIM PE=3 SV=1	520	53183	73.7	14920	1	1	0	8087041	1
5	1	2::F1NJ08_CHICK	Vimentin OS=Gallus gallus GN=VIM PE=3 SV=1	520	53183	73.7	15690	1	1	0	7734043	0
5	1	2::F1NJ08_CHICK	Vimentin OS=Gallus gallus GN=VIM PE=3 SV=1	520	53183	73.7	15691	1	1	0	7734045	0
5	1	2::F1NJ08_CHICK	Vimentin OS=Gallus gallus GN=VIM PE=3 SV=1	520	53183	73.7	15692	1	1	0	6189251	0
5	1	2::F1NJ08_CHICK	Vimentin OS=Gallus gallus GN=VIM PE=3 SV=1	520	53183	73.7	15693	1	1	0	7734047	0
5	1	2::F1NJ08_CHICK	Vimentin OS=Gallus gallus GN=VIM PE=3 SV=1	520	53183	73.7	15694	1	1	0	10308709	0
5	1	2::F1NJ08_CHICK	Vimentin OS=Gallus gallus GN=VIM PE=3 SV=1	520	53183	73.7	15695	1	1	0	10308714	0
5	1	2::F1NJ08_CHICK	Vimentin OS=Gallus gallus GN=VIM PE=3 SV=1	520	53183	73.7	15726	1	1	0	7774024	0	emPAI	2.41
5	2	2::Q49MC0_CHICK	Vimentin (Fragment) OS=Gallus gallus GN=vimentin PE=3 SV=1	312	30035	86.4	2259	1	0	0	3031664	0
5	2	2::Q49MC0_CHICK	Vimentin (Fragment) OS=Gallus gallus GN=vimentin PE=3 SV=1	312	30035	86.4	2588	1	0	0	3181449	0
5	2	2::Q49MC0_CHICK	Vimentin (Fragment) OS=Gallus gallus GN=vimentin PE=3 SV=1	312	30035	86.4	2656	1	0	0	3231820	0
5	2	2::Q49MC0_CHICK	Vimentin (Fragment) OS=Gallus gallus GN=vimentin PE=3 SV=1	312	30035	86.4	3291	1	0	0	3516805	0
5	2	2::Q49MC0_CHICK	Vimentin (Fragment) OS=Gallus gallus GN=vimentin PE=3 SV=1	312	30035	86.4	3299	1	0	0	3521731	0
5	2	2::Q49MC0_CHICK	Vimentin (Fragment) OS=Gallus gallus GN=vimentin PE=3 SV=1	312	30035	86.4	5349	1	0	0	4462127	0
5	2	2::Q49MC0_CHICK	Vimentin (Fragment) OS=Gallus gallus GN=vimentin PE=3 SV=1	312	30035	86.4	5350	1	0	0	4462128	0
5	2	2::Q49MC0_CHICK	Vimentin (Fragment) OS=Gallus gallus GN=vimentin PE=3 SV=1	312	30035	86.4	5351	1	0	0	4462130	0
5	2	2::Q49MC0_CHICK	Vimentin (Fragment) OS=Gallus gallus GN=vimentin PE=3 SV=1	312	30035	86.4	5352	1	0	0	4462133	0
5	2	2::Q49MC0_CHICK	Vimentin (Fragment) OS=Gallus gallus GN=vimentin PE=3 SV=1	312	30035	86.4	5635	1	0	0	4552077	0
5	2	2::Q49MC0_CHICK	Vimentin (Fragment) OS=Gallus gallus GN=vimentin PE=3 SV=1	312	30035	86.4	5636	1	0	0	4552079	0
5	2	2::Q49MC0_CHICK	Vimentin (Fragment) OS=Gallus gallus GN=vimentin PE=3 SV=1	312	30035	86.4	5658	1	0	0	4562331	0
5	2	2::Q49MC0_CHICK	Vimentin (Fragment) OS=Gallus gallus GN=vimentin PE=3 SV=1	312	30035	86.4	5659	1	0	0	3044912	0
5	2	2::Q49MC0_CHICK	Vimentin (Fragment) OS=Gallus gallus GN=vimentin PE=3 SV=1	312	30035	86.4	5660	1	0	0	3044912	0
5	2	2::Q49MC0_CHICK	Vimentin (Fragment) OS=Gallus gallus GN=vimentin PE=3 SV=1	312	30035	86.4	5661	1	0	0	4562333	0
5	2	2::Q49MC0_CHICK	Vimentin (Fragment) OS=Gallus gallus GN=vimentin PE=3 SV=1	312	30035	86.4	5662	1	0	0	3044913	0
5	2	2::Q49MC0_CHICK	Vimentin (Fragment) OS=Gallus gallus GN=vimentin PE=3 SV=1	312	30035	86.4	5899	1	0	0	4667383	0
5	2	2::Q49MC0_CHICK	Vimentin (Fragment) OS=Gallus gallus GN=vimentin PE=3 SV=1	312	30035	86.4	5900	1	0	0	4667385	0
5	2	2::Q49MC0_CHICK	Vimentin (Fragment) OS=Gallus gallus GN=vimentin PE=3 SV=1	312	30035	86.4	5902	1	0	0	4667386	0
5	2	2::Q49MC0_CHICK	Vimentin (Fragment) OS=Gallus gallus GN=vimentin PE=3 SV=1	312	30035	86.4	5905	1	0	0	4667388	0
5	2	2::Q49MC0_CHICK	Vimentin (Fragment) OS=Gallus gallus GN=vimentin PE=3 SV=1	312	30035	86.4	6207	1	0	1	4807413	0
5	2	2::Q49MC0_CHICK	Vimentin (Fragment) OS=Gallus gallus GN=vimentin PE=3 SV=1	312	30035	86.4	6729	1	0	0	5122599	0
5	2	2::Q49MC0_CHICK	Vimentin (Fragment) OS=Gallus gallus GN=vimentin PE=3 SV=1	312	30035	86.4	6863	1	0	0	3471897	1
5	2	2::Q49MC0_CHICK	Vimentin (Fragment) OS=Gallus gallus GN=vimentin PE=3 SV=1	312	30035	86.4	6864	1	0	0	3471898	1
5	2	2::Q49MC0_CHICK	Vimentin (Fragment) OS=Gallus gallus GN=vimentin PE=3 SV=1	312	30035	86.4	7303	1	0	0	3651815	0
5	2	2::Q49MC0_CHICK	Vimentin (Fragment) OS=Gallus gallus GN=vimentin PE=3 SV=1	312	30035	86.4	7304	1	0	0	5472688	0
5	2	2::Q49MC0_CHICK	Vimentin (Fragment) OS=Gallus gallus GN=vimentin PE=3 SV=1	312	30035	86.4	7305	1	0	0	5472694	0
5	2	2::Q49MC0_CHICK	Vimentin (Fragment) OS=Gallus gallus GN=vimentin PE=3 SV=1	312	30035	86.4	7518	1	0	0	5597795	0
5	2	2::Q49MC0_CHICK	Vimentin (Fragment) OS=Gallus gallus GN=vimentin PE=3 SV=1	312	30035	86.4	7519	1	0	0	5597801	0
5	2	2::Q49MC0_CHICK	Vimentin (Fragment) OS=Gallus gallus GN=vimentin PE=3 SV=1	312	30035	86.4	7538	1	0	0	5612966	0
5	2	2::Q49MC0_CHICK	Vimentin (Fragment) OS=Gallus gallus GN=vimentin PE=3 SV=1	312	30035	86.4	7540	1	0	0	5612971	0
5	2	2::Q49MC0_CHICK	Vimentin (Fragment) OS=Gallus gallus GN=vimentin PE=3 SV=1	312	30035	86.4	7669	2	0	0	5677775	0
5	2	2::Q49MC0_CHICK	Vimentin (Fragment) OS=Gallus gallus GN=vimentin PE=3 SV=1	312	30035	86.4	8941	1	0	0	6483388	0
5	2	2::Q49MC0_CHICK	Vimentin (Fragment) OS=Gallus gallus GN=vimentin PE=3 SV=1	312	30035	86.4	9064	1	0	0	6553082	0
5	2	2::Q49MC0_CHICK	Vimentin (Fragment) OS=Gallus gallus GN=vimentin PE=3 SV=1	312	30035	86.4	9065	1	0	0	6553082	0
5	2	2::Q49MC0_CHICK	Vimentin (Fragment) OS=Gallus gallus GN=vimentin PE=3 SV=1	312	30035	86.4	10026	1	0	0	4786018	0
5	2	2::Q49MC0_CHICK	Vimentin (Fragment) OS=Gallus gallus GN=vimentin PE=3 SV=1	312	30035	86.4	10027	1	0	0	7173993	0
5	2	2::Q49MC0_CHICK	Vimentin (Fragment) OS=Gallus gallus GN=vimentin PE=3 SV=1	312	30035	86.4	10028	1	0	0	4786021	0
5	2	2::Q49MC0_CHICK	Vimentin (Fragment) OS=Gallus gallus GN=vimentin PE=3 SV=1	312	30035	86.4	10029	1	0	0	7173996	0
5	2	2::Q49MC0_CHICK	Vimentin (Fragment) OS=Gallus gallus GN=vimentin PE=3 SV=1	312	30035	86.4	10942	1	0	0	7814472	1
5	2	2::Q49MC0_CHICK	Vimentin (Fragment) OS=Gallus gallus GN=vimentin PE=3 SV=1	312	30035	86.4	10943	1	0	0	7814477	1
5	2	2::Q49MC0_CHICK	Vimentin (Fragment) OS=Gallus gallus GN=vimentin PE=3 SV=1	312	30035	86.4	10944	1	0	0	5213011	1
5	2	2::Q49MC0_CHICK	Vimentin (Fragment) OS=Gallus gallus GN=vimentin PE=3 SV=1	312	30035	86.4	10945	1	0	0	5213013	1
5	2	2::Q49MC0_CHICK	Vimentin (Fragment) OS=Gallus gallus GN=vimentin PE=3 SV=1	312	30035	86.4	10946	1	0	0	5213016	1
5	2	2::Q49MC0_CHICK	Vimentin (Fragment) OS=Gallus gallus GN=vimentin PE=3 SV=1	312	30035	86.4	11151	1	0	0	7939406	0
5	2	2::Q49MC0_CHICK	Vimentin (Fragment) OS=Gallus gallus GN=vimentin PE=3 SV=1	312	30035	86.4	11153	1	0	0	7939420	0
5	2	2::Q49MC0_CHICK	Vimentin (Fragment) OS=Gallus gallus GN=vimentin PE=3 SV=1	312	30035	86.4	11154	1	0	0	5296307	0
5	2	2::Q49MC0_CHICK	Vimentin (Fragment) OS=Gallus gallus GN=vimentin PE=3 SV=1	312	30035	86.4	11953	1	0	0	8494213	0
5	2	2::Q49MC0_CHICK	Vimentin (Fragment) OS=Gallus gallus GN=vimentin PE=3 SV=1	312	30035	86.4	11954	1	0	0	5666170	0
5	2	2::Q49MC0_CHICK	Vimentin (Fragment) OS=Gallus gallus GN=vimentin PE=3 SV=1	312	30035	86.4	12824	1	0	0	6129391	0
5	2	2::Q49MC0_CHICK	Vimentin (Fragment) OS=Gallus gallus GN=vimentin PE=3 SV=1	312	30035	86.4	12825	1	0	0	6129392	0
5	2	2::Q49MC0_CHICK	Vimentin (Fragment) OS=Gallus gallus GN=vimentin PE=3 SV=1	312	30035	86.4	12826	1	0	0	9189052	0
5	2	2::Q49MC0_CHICK	Vimentin (Fragment) OS=Gallus gallus GN=vimentin PE=3 SV=1	312	30035	86.4	14289	1	0	0	7296619	0
5	2	2::Q49MC0_CHICK	Vimentin (Fragment) OS=Gallus gallus GN=vimentin PE=3 SV=1	312	30035	86.4	14290	1	0	0	7296619	0
5	2	2::Q49MC0_CHICK	Vimentin (Fragment) OS=Gallus gallus GN=vimentin PE=3 SV=1	312	30035	86.4	14291	1	0	0	7296624	0
5	2	2::Q49MC0_CHICK	Vimentin (Fragment) OS=Gallus gallus GN=vimentin PE=3 SV=1	312	30035	86.4	14292	1	0	0	10939902	0
5	2	2::Q49MC0_CHICK	Vimentin (Fragment) OS=Gallus gallus GN=vimentin PE=3 SV=1	312	30035	86.4	14293	1	0	0	10939904	0
5	2	2::Q49MC0_CHICK	Vimentin (Fragment) OS=Gallus gallus GN=vimentin PE=3 SV=1	312	30035	86.4	14331	1	0	0	7349934	0
5	2	2::Q49MC0_CHICK	Vimentin (Fragment) OS=Gallus gallus GN=vimentin PE=3 SV=1	312	30035	86.4	14920	1	0	0	8087041	1
5	2	2::Q49MC0_CHICK	Vimentin (Fragment) OS=Gallus gallus GN=vimentin PE=3 SV=1	312	30035	86.4	15690	1	0	0	7734043	0
5	2	2::Q49MC0_CHICK	Vimentin (Fragment) OS=Gallus gallus GN=vimentin PE=3 SV=1	312	30035	86.4	15691	1	0	0	7734045	0
5	2	2::Q49MC0_CHICK	Vimentin (Fragment) OS=Gallus gallus GN=vimentin PE=3 SV=1	312	30035	86.4	15692	1	0	0	6189251	0
5	2	2::Q49MC0_CHICK	Vimentin (Fragment) OS=Gallus gallus GN=vimentin PE=3 SV=1	312	30035	86.4	15693	1	0	0	7734047	0
5	2	2::Q49MC0_CHICK	Vimentin (Fragment) OS=Gallus gallus GN=vimentin PE=3 SV=1	312	30035	86.4	15694	1	0	0	10308709	0
5	2	2::Q49MC0_CHICK	Vimentin (Fragment) OS=Gallus gallus GN=vimentin PE=3 SV=1	312	30035	86.4	15695	1	0	0	10308714	0
5	2	2::Q49MC0_CHICK	Vimentin (Fragment) OS=Gallus gallus GN=vimentin PE=3 SV=1	312	30035	86.4	15726	1	0	0	7774024	0	emPAI	2.35
5		2::Q49MC1_CHICK	Vimentin (Fragment) OS=Gallus gallus GN=vimentin PE=4 SV=1	217	18380	56.5	2553	4	0	1	3161745	0
5		2::Q49MC1_CHICK	Vimentin (Fragment) OS=Gallus gallus GN=vimentin PE=4 SV=1	217	18380	56.5	2555	1	0	1	3161747	0
5		2::Q49MC1_CHICK	Vimentin (Fragment) OS=Gallus gallus GN=vimentin PE=4 SV=1	217	18380	56.5	2556	1	0	1	3161747	0
5		2::Q49MC1_CHICK	Vimentin (Fragment) OS=Gallus gallus GN=vimentin PE=4 SV=1	217	18380	56.5	2557	4	0	1	3161747	0
5		2::Q49MC1_CHICK	Vimentin (Fragment) OS=Gallus gallus GN=vimentin PE=4 SV=1	217	18380	56.5	2558	1	0	1	3161748	0
5		2::Q49MC1_CHICK	Vimentin (Fragment) OS=Gallus gallus GN=vimentin PE=4 SV=1	217	18380	56.5	2559	1	0	1	3161748	0
5		2::Q49MC1_CHICK	Vimentin (Fragment) OS=Gallus gallus GN=vimentin PE=4 SV=1	217	18380	56.5	4496	1	0	1	4142172	0
5		2::Q49MC1_CHICK	Vimentin (Fragment) OS=Gallus gallus GN=vimentin PE=4 SV=1	217	18380	56.5	5061	1	0	1	4357221	0
5		2::Q49MC1_CHICK	Vimentin (Fragment) OS=Gallus gallus GN=vimentin PE=4 SV=1	217	18380	56.5	5062	1	0	1	4357224	0
5		2::Q49MC1_CHICK	Vimentin (Fragment) OS=Gallus gallus GN=vimentin PE=4 SV=1	217	18380	56.5	5613	1	0	1	4537380	0
5		2::Q49MC1_CHICK	Vimentin (Fragment) OS=Gallus gallus GN=vimentin PE=4 SV=1	217	18380	56.5	5614	1	0	1	4537382	0
5		2::Q49MC1_CHICK	Vimentin (Fragment) OS=Gallus gallus GN=vimentin PE=4 SV=1	217	18380	56.5	7026	1	0	1	5307682	0
5		2::Q49MC1_CHICK	Vimentin (Fragment) OS=Gallus gallus GN=vimentin PE=4 SV=1	217	18380	56.5	7028	1	0	1	5307682	0
5		2::Q49MC1_CHICK	Vimentin (Fragment) OS=Gallus gallus GN=vimentin PE=4 SV=1	217	18380	56.5	7029	1	0	1	5307683	0
5		2::Q49MC1_CHICK	Vimentin (Fragment) OS=Gallus gallus GN=vimentin PE=4 SV=1	217	18380	56.5	7039	1	0	1	5317486	0
5		2::Q49MC1_CHICK	Vimentin (Fragment) OS=Gallus gallus GN=vimentin PE=4 SV=1	217	18380	56.5	7040	1	0	1	5317491	0
5		2::Q49MC1_CHICK	Vimentin (Fragment) OS=Gallus gallus GN=vimentin PE=4 SV=1	217	18380	56.5	7041	1	0	1	5317491	0
5		2::Q49MC1_CHICK	Vimentin (Fragment) OS=Gallus gallus GN=vimentin PE=4 SV=1	217	18380	56.5	7180	1	0	1	5397468	0
5		2::Q49MC1_CHICK	Vimentin (Fragment) OS=Gallus gallus GN=vimentin PE=4 SV=1	217	18380	56.5	7490	1	0	1	3725286	0
5		2::Q49MC1_CHICK	Vimentin (Fragment) OS=Gallus gallus GN=vimentin PE=4 SV=1	217	18380	56.5	7491	1	0	1	5582897	0
5		2::Q49MC1_CHICK	Vimentin (Fragment) OS=Gallus gallus GN=vimentin PE=4 SV=1	217	18380	56.5	7492	1	0	1	5582900	0
5		2::Q49MC1_CHICK	Vimentin (Fragment) OS=Gallus gallus GN=vimentin PE=4 SV=1	217	18380	56.5	7506	1	0	1	5587801	0
5		2::Q49MC1_CHICK	Vimentin (Fragment) OS=Gallus gallus GN=vimentin PE=4 SV=1	217	18380	56.5	7507	1	0	1	5587811	0
5		2::Q49MC1_CHICK	Vimentin (Fragment) OS=Gallus gallus GN=vimentin PE=4 SV=1	217	18380	56.5	7979	1	0	1	3905763	0
5		2::Q49MC1_CHICK	Vimentin (Fragment) OS=Gallus gallus GN=vimentin PE=4 SV=1	217	18380	56.5	7980	1	0	1	3905765	0
5		2::Q49MC1_CHICK	Vimentin (Fragment) OS=Gallus gallus GN=vimentin PE=4 SV=1	217	18380	56.5	7981	1	0	1	5853611	0
5		2::Q49MC1_CHICK	Vimentin (Fragment) OS=Gallus gallus GN=vimentin PE=4 SV=1	217	18380	56.5	7982	1	0	1	5853616	0
5		2::Q49MC1_CHICK	Vimentin (Fragment) OS=Gallus gallus GN=vimentin PE=4 SV=1	217	18380	56.5	7983	1	0	1	5853618	0
5		2::Q49MC1_CHICK	Vimentin (Fragment) OS=Gallus gallus GN=vimentin PE=4 SV=1	217	18380	56.5	8676	1	0	1	6277883	0
5		2::Q49MC1_CHICK	Vimentin (Fragment) OS=Gallus gallus GN=vimentin PE=4 SV=1	217	18380	56.5	13717	1	0	1	6799915	0
5		2::Q49MC1_CHICK	Vimentin (Fragment) OS=Gallus gallus GN=vimentin PE=4 SV=1	217	18380	56.5	13718	1	0	1	6799924	0
5		2::Q49MC1_CHICK	Vimentin (Fragment) OS=Gallus gallus GN=vimentin PE=4 SV=1	217	18380	56.5	13719	1	0	1	10194852	0
5		2::Q49MC1_CHICK	Vimentin (Fragment) OS=Gallus gallus GN=vimentin PE=4 SV=1	217	18380	56.5	13720	1	0	1	6799931	0
5		2::Q49MC1_CHICK	Vimentin (Fragment) OS=Gallus gallus GN=vimentin PE=4 SV=1	217	18380	56.5	13774	1	0	1	6853241	0
5		2::Q49MC1_CHICK	Vimentin (Fragment) OS=Gallus gallus GN=vimentin PE=4 SV=1	217	18380	56.5	13775	1	0	1	6853252	0
5		2::E1BZ05_CHICK	Desmin OS=Gallus gallus GN=DES PE=3 SV=2	62	48807	18.2	2553	4	0	1	3161745	0
5		2::E1BZ05_CHICK	Desmin OS=Gallus gallus GN=DES PE=3 SV=2	62	48807	18.2	2555	1	0	1	3161747	0
5		2::E1BZ05_CHICK	Desmin OS=Gallus gallus GN=DES PE=3 SV=2	62	48807	18.2	2556	1	0	1	3161747	0
5		2::E1BZ05_CHICK	Desmin OS=Gallus gallus GN=DES PE=3 SV=2	62	48807	18.2	2557	4	0	1	3161747	0
5		2::E1BZ05_CHICK	Desmin OS=Gallus gallus GN=DES PE=3 SV=2	62	48807	18.2	2558	1	0	1	3161748	0
5		2::E1BZ05_CHICK	Desmin OS=Gallus gallus GN=DES PE=3 SV=2	62	48807	18.2	2559	1	0	1	3161748	0
5		2::E1BZ05_CHICK	Desmin OS=Gallus gallus GN=DES PE=3 SV=2	62	48807	18.2	2656	1	0	1	3231820	0
5		2::E1BZ05_CHICK	Desmin OS=Gallus gallus GN=DES PE=3 SV=2	62	48807	18.2	3291	1	0	0	3516805	0
5		2::E1BZ05_CHICK	Desmin OS=Gallus gallus GN=DES PE=3 SV=2	62	48807	18.2	3299	1	0	0	3521731	0
5		2::E1BZ05_CHICK	Desmin OS=Gallus gallus GN=DES PE=3 SV=2	62	48807	18.2	5659	4	0	1	3044912	0
5		2::E1BZ05_CHICK	Desmin OS=Gallus gallus GN=DES PE=3 SV=2	62	48807	18.2	5661	4	0	1	4562333	0
5		2::E1BZ05_CHICK	Desmin OS=Gallus gallus GN=DES PE=3 SV=2	62	48807	18.2	5662	3	0	1	3044913	0
5		2::E1BZ05_CHICK	Desmin OS=Gallus gallus GN=DES PE=3 SV=2	62	48807	18.2	6566	3	0	1	5017779	0
5		2::E1BZ05_CHICK	Desmin OS=Gallus gallus GN=DES PE=3 SV=2	62	48807	18.2	6863	2	0	1	3471897	1
5		2::E1BZ05_CHICK	Desmin OS=Gallus gallus GN=DES PE=3 SV=2	62	48807	18.2	7490	1	0	1	3725286	0
5		2::E1BZ05_CHICK	Desmin OS=Gallus gallus GN=DES PE=3 SV=2	62	48807	18.2	7491	1	0	1	5582897	0
5		2::E1BZ05_CHICK	Desmin OS=Gallus gallus GN=DES PE=3 SV=2	62	48807	18.2	7492	1	0	1	5582900	0
5		2::E1BZ05_CHICK	Desmin OS=Gallus gallus GN=DES PE=3 SV=2	62	48807	18.2	7506	1	0	1	5587801	0
5		2::E1BZ05_CHICK	Desmin OS=Gallus gallus GN=DES PE=3 SV=2	62	48807	18.2	7507	1	0	1	5587811	0
5		2::E1BZ05_CHICK	Desmin OS=Gallus gallus GN=DES PE=3 SV=2	62	48807	18.2	7538	1	0	0	5612966	0
5		2::E1BZ05_CHICK	Desmin OS=Gallus gallus GN=DES PE=3 SV=2	62	48807	18.2	7540	1	0	0	5612971	0
5		2::E1BZ05_CHICK	Desmin OS=Gallus gallus GN=DES PE=3 SV=2	62	48807	18.2	15726	2	0	1	7774024	0
5		2::F1NE70_CHICK	Uncharacterized protein (Fragment) OS=Gallus gallus GN=GFAP PE=3 SV=1	57	49906	15.4	2259	1	0	0	3031664	0
5		2::F1NE70_CHICK	Uncharacterized protein (Fragment) OS=Gallus gallus GN=GFAP PE=3 SV=1	57	49906	15.4	2656	1	0	0	3231820	0
5		2::F1NE70_CHICK	Uncharacterized protein (Fragment) OS=Gallus gallus GN=GFAP PE=3 SV=1	57	49906	15.4	3786	1	0	1	3767137	1
5		2::F1NE70_CHICK	Uncharacterized protein (Fragment) OS=Gallus gallus GN=GFAP PE=3 SV=1	57	49906	15.4	3787	2	0	1	3767138	1
5		2::F1NE70_CHICK	Uncharacterized protein (Fragment) OS=Gallus gallus GN=GFAP PE=3 SV=1	57	49906	15.4	5349	1	0	0	4462127	0
5		2::F1NE70_CHICK	Uncharacterized protein (Fragment) OS=Gallus gallus GN=GFAP PE=3 SV=1	57	49906	15.4	5350	1	0	0	4462128	0
5		2::F1NE70_CHICK	Uncharacterized protein (Fragment) OS=Gallus gallus GN=GFAP PE=3 SV=1	57	49906	15.4	5351	1	0	0	4462130	0
5		2::F1NE70_CHICK	Uncharacterized protein (Fragment) OS=Gallus gallus GN=GFAP PE=3 SV=1	57	49906	15.4	5352	1	0	0	4462133	0
5		2::F1NE70_CHICK	Uncharacterized protein (Fragment) OS=Gallus gallus GN=GFAP PE=3 SV=1	57	49906	15.4	5659	4	0	1	3044912	0
5		2::F1NE70_CHICK	Uncharacterized protein (Fragment) OS=Gallus gallus GN=GFAP PE=3 SV=1	57	49906	15.4	5661	4	0	1	4562333	0
5		2::F1NE70_CHICK	Uncharacterized protein (Fragment) OS=Gallus gallus GN=GFAP PE=3 SV=1	57	49906	15.4	5662	3	0	1	3044913	0
5		2::F1NE70_CHICK	Uncharacterized protein (Fragment) OS=Gallus gallus GN=GFAP PE=3 SV=1	57	49906	15.4	5899	1	0	0	4667383	0
5		2::F1NE70_CHICK	Uncharacterized protein (Fragment) OS=Gallus gallus GN=GFAP PE=3 SV=1	57	49906	15.4	5900	1	0	0	4667385	0
5		2::F1NE70_CHICK	Uncharacterized protein (Fragment) OS=Gallus gallus GN=GFAP PE=3 SV=1	57	49906	15.4	5902	1	0	0	4667386	0
5		2::F1NE70_CHICK	Uncharacterized protein (Fragment) OS=Gallus gallus GN=GFAP PE=3 SV=1	57	49906	15.4	5905	1	0	0	4667388	0
5		2::F1NE70_CHICK	Uncharacterized protein (Fragment) OS=Gallus gallus GN=GFAP PE=3 SV=1	57	49906	15.4	6182	7	0	1	4792909	0
5		2::F1NE70_CHICK	Uncharacterized protein (Fragment) OS=Gallus gallus GN=GFAP PE=3 SV=1	57	49906	15.4	6184	3	0	1	4792912	0
5		2::F1NE70_CHICK	Uncharacterized protein (Fragment) OS=Gallus gallus GN=GFAP PE=3 SV=1	57	49906	15.4	6185	3	0	1	4792914	0
5		2::F1NE70_CHICK	Uncharacterized protein (Fragment) OS=Gallus gallus GN=GFAP PE=3 SV=1	57	49906	15.4	7227	1	0	1	3621934	0
5		2::F1NE70_CHICK	Uncharacterized protein (Fragment) OS=Gallus gallus GN=GFAP PE=3 SV=1	57	49906	15.4	8836	1	0	1	6393592	0
6	1	2::F1P476_CHICK	Actin, gamma-enteric smooth muscle OS=Gallus gallus GN=ACTG2 PE=3 SV=2	297	41982	42.2	2564	1	1	0	3161928	0
6	1	2::F1P476_CHICK	Actin, gamma-enteric smooth muscle OS=Gallus gallus GN=ACTG2 PE=3 SV=2	297	41982	42.2	2565	1	1	0	3161928	0
6	1	2::F1P476_CHICK	Actin, gamma-enteric smooth muscle OS=Gallus gallus GN=ACTG2 PE=3 SV=2	297	41982	42.2	2566	1	1	0	3161929	0
6	1	2::F1P476_CHICK	Actin, gamma-enteric smooth muscle OS=Gallus gallus GN=ACTG2 PE=3 SV=2	297	41982	42.2	2567	1	1	0	3161929	0
6	1	2::F1P476_CHICK	Actin, gamma-enteric smooth muscle OS=Gallus gallus GN=ACTG2 PE=3 SV=2	297	41982	42.2	2645	1	1	0	3226903	0
6	1	2::F1P476_CHICK	Actin, gamma-enteric smooth muscle OS=Gallus gallus GN=ACTG2 PE=3 SV=2	297	41982	42.2	2647	1	1	0	3226904	0
6	1	2::F1P476_CHICK	Actin, gamma-enteric smooth muscle OS=Gallus gallus GN=ACTG2 PE=3 SV=2	297	41982	42.2	2650	2	1	0	3227211	0
6	1	2::F1P476_CHICK	Actin, gamma-enteric smooth muscle OS=Gallus gallus GN=ACTG2 PE=3 SV=2	297	41982	42.2	2651	2	1	0	3227214	0
6	1	2::F1P476_CHICK	Actin, gamma-enteric smooth muscle OS=Gallus gallus GN=ACTG2 PE=3 SV=2	297	41982	42.2	2653	1	1	0	3227214	0
6	1	2::F1P476_CHICK	Actin, gamma-enteric smooth muscle OS=Gallus gallus GN=ACTG2 PE=3 SV=2	297	41982	42.2	4209	1	1	1	3982406	0
6	1	2::F1P476_CHICK	Actin, gamma-enteric smooth muscle OS=Gallus gallus GN=ACTG2 PE=3 SV=2	297	41982	42.2	4210	1	1	1	3982407	0
6	1	2::F1P476_CHICK	Actin, gamma-enteric smooth muscle OS=Gallus gallus GN=ACTG2 PE=3 SV=2	297	41982	42.2	4211	1	1	1	3982408	0
6	1	2::F1P476_CHICK	Actin, gamma-enteric smooth muscle OS=Gallus gallus GN=ACTG2 PE=3 SV=2	297	41982	42.2	6347	1	1	0	4887288	0
6	1	2::F1P476_CHICK	Actin, gamma-enteric smooth muscle OS=Gallus gallus GN=ACTG2 PE=3 SV=2	297	41982	42.2	6348	1	1	0	4887288	0
6	1	2::F1P476_CHICK	Actin, gamma-enteric smooth muscle OS=Gallus gallus GN=ACTG2 PE=3 SV=2	297	41982	42.2	6349	1	1	0	4887289	0
6	1	2::F1P476_CHICK	Actin, gamma-enteric smooth muscle OS=Gallus gallus GN=ACTG2 PE=3 SV=2	297	41982	42.2	6528	1	1	0	4997480	0
6	1	2::F1P476_CHICK	Actin, gamma-enteric smooth muscle OS=Gallus gallus GN=ACTG2 PE=3 SV=2	297	41982	42.2	6529	1	1	0	4997483	0
6	1	2::F1P476_CHICK	Actin, gamma-enteric smooth muscle OS=Gallus gallus GN=ACTG2 PE=3 SV=2	297	41982	42.2	6647	1	1	0	5077458	0
6	1	2::F1P476_CHICK	Actin, gamma-enteric smooth muscle OS=Gallus gallus GN=ACTG2 PE=3 SV=2	297	41982	42.2	6648	1	1	0	5077458	0
6	1	2::F1P476_CHICK	Actin, gamma-enteric smooth muscle OS=Gallus gallus GN=ACTG2 PE=3 SV=2	297	41982	42.2	7894	1	1	1	5813141	0
6	1	2::F1P476_CHICK	Actin, gamma-enteric smooth muscle OS=Gallus gallus GN=ACTG2 PE=3 SV=2	297	41982	42.2	7895	1	1	1	5813148	0
6	1	2::F1P476_CHICK	Actin, gamma-enteric smooth muscle OS=Gallus gallus GN=ACTG2 PE=3 SV=2	297	41982	42.2	7995	1	1	0	5862897	0
6	1	2::F1P476_CHICK	Actin, gamma-enteric smooth muscle OS=Gallus gallus GN=ACTG2 PE=3 SV=2	297	41982	42.2	7996	1	1	0	3911957	0
6	1	2::F1P476_CHICK	Actin, gamma-enteric smooth muscle OS=Gallus gallus GN=ACTG2 PE=3 SV=2	297	41982	42.2	7997	1	1	0	5862902	0
6	1	2::F1P476_CHICK	Actin, gamma-enteric smooth muscle OS=Gallus gallus GN=ACTG2 PE=3 SV=2	297	41982	42.2	7998	1	1	0	3911959	0
6	1	2::F1P476_CHICK	Actin, gamma-enteric smooth muscle OS=Gallus gallus GN=ACTG2 PE=3 SV=2	297	41982	42.2	8061	1	1	1	5893115	0
6	1	2::F1P476_CHICK	Actin, gamma-enteric smooth muscle OS=Gallus gallus GN=ACTG2 PE=3 SV=2	297	41982	42.2	8062	1	1	1	5893121	0
6	1	2::F1P476_CHICK	Actin, gamma-enteric smooth muscle OS=Gallus gallus GN=ACTG2 PE=3 SV=2	297	41982	42.2	8203	1	1	0	5997654	0
6	1	2::F1P476_CHICK	Actin, gamma-enteric smooth muscle OS=Gallus gallus GN=ACTG2 PE=3 SV=2	297	41982	42.2	8204	1	1	0	5997655	0
6	1	2::F1P476_CHICK	Actin, gamma-enteric smooth muscle OS=Gallus gallus GN=ACTG2 PE=3 SV=2	297	41982	42.2	8205	1	1	0	5997657	0
6	1	2::F1P476_CHICK	Actin, gamma-enteric smooth muscle OS=Gallus gallus GN=ACTG2 PE=3 SV=2	297	41982	42.2	10483	1	1	1	5009087	0
6	1	2::F1P476_CHICK	Actin, gamma-enteric smooth muscle OS=Gallus gallus GN=ACTG2 PE=3 SV=2	297	41982	42.2	12558	1	1	1	8959505	0
6	1	2::F1P476_CHICK	Actin, gamma-enteric smooth muscle OS=Gallus gallus GN=ACTG2 PE=3 SV=2	297	41982	42.2	12559	1	1	1	8959512	0
6	1	2::F1P476_CHICK	Actin, gamma-enteric smooth muscle OS=Gallus gallus GN=ACTG2 PE=3 SV=2	297	41982	42.2	12560	1	1	1	5976367	0
6	1	2::F1P476_CHICK	Actin, gamma-enteric smooth muscle OS=Gallus gallus GN=ACTG2 PE=3 SV=2	297	41982	42.2	12561	1	1	1	5976368	0
6	1	2::F1P476_CHICK	Actin, gamma-enteric smooth muscle OS=Gallus gallus GN=ACTG2 PE=3 SV=2	297	41982	42.2	12562	1	1	1	8959524	0
6	1	2::F1P476_CHICK	Actin, gamma-enteric smooth muscle OS=Gallus gallus GN=ACTG2 PE=3 SV=2	297	41982	42.2	12563	1	1	1	8959526	0
6	1	2::F1P476_CHICK	Actin, gamma-enteric smooth muscle OS=Gallus gallus GN=ACTG2 PE=3 SV=2	297	41982	42.2	12564	1	1	1	5976375	0
6	1	2::F1P476_CHICK	Actin, gamma-enteric smooth muscle OS=Gallus gallus GN=ACTG2 PE=3 SV=2	297	41982	42.2	12565	1	1	1	5976376	0
6	1	2::F1P476_CHICK	Actin, gamma-enteric smooth muscle OS=Gallus gallus GN=ACTG2 PE=3 SV=2	297	41982	42.2	12566	1	1	1	5976377	0
6	1	2::F1P476_CHICK	Actin, gamma-enteric smooth muscle OS=Gallus gallus GN=ACTG2 PE=3 SV=2	297	41982	42.2	12568	1	1	1	8964434	0
6	1	2::F1P476_CHICK	Actin, gamma-enteric smooth muscle OS=Gallus gallus GN=ACTG2 PE=3 SV=2	297	41982	42.2	12569	1	1	1	5979652	0
6	1	2::F1P476_CHICK	Actin, gamma-enteric smooth muscle OS=Gallus gallus GN=ACTG2 PE=3 SV=2	297	41982	42.2	13398	1	1	1	6526886	0
6	1	2::F1P476_CHICK	Actin, gamma-enteric smooth muscle OS=Gallus gallus GN=ACTG2 PE=3 SV=2	297	41982	42.2	13399	1	1	1	6526888	0
6	1	2::F1P476_CHICK	Actin, gamma-enteric smooth muscle OS=Gallus gallus GN=ACTG2 PE=3 SV=2	297	41982	42.2	13419	1	1	1	6543097	0
6	1	2::F1P476_CHICK	Actin, gamma-enteric smooth muscle OS=Gallus gallus GN=ACTG2 PE=3 SV=2	297	41982	42.2	13420	1	1	1	9809613	0
6	1	2::F1P476_CHICK	Actin, gamma-enteric smooth muscle OS=Gallus gallus GN=ACTG2 PE=3 SV=2	297	41982	42.2	13421	1	1	1	6543102	0
6	1	2::F1P476_CHICK	Actin, gamma-enteric smooth muscle OS=Gallus gallus GN=ACTG2 PE=3 SV=2	297	41982	42.2	13422	1	1	1	9809622	0
6	1	2::F1P476_CHICK	Actin, gamma-enteric smooth muscle OS=Gallus gallus GN=ACTG2 PE=3 SV=2	297	41982	42.2	13423	1	1	1	6543107	0
6	1	2::F1P476_CHICK	Actin, gamma-enteric smooth muscle OS=Gallus gallus GN=ACTG2 PE=3 SV=2	297	41982	42.2	13486	1	1	1	6596421	0
6	1	2::F1P476_CHICK	Actin, gamma-enteric smooth muscle OS=Gallus gallus GN=ACTG2 PE=3 SV=2	297	41982	42.2	13487	1	1	1	6596424	0
6	1	2::F1P476_CHICK	Actin, gamma-enteric smooth muscle OS=Gallus gallus GN=ACTG2 PE=3 SV=2	297	41982	42.2	14410	1	1	1	7433617	0	emPAI	0.60
6	2	2::Q5ZLX9_CHICK	Uncharacterized protein OS=Gallus gallus GN=RCJMB04_4h19 PE=2 SV=1	77	23260	45.7	2564	1	0	0	3161928	0
6	2	2::Q5ZLX9_CHICK	Uncharacterized protein OS=Gallus gallus GN=RCJMB04_4h19 PE=2 SV=1	77	23260	45.7	2565	1	0	0	3161928	0
6	2	2::Q5ZLX9_CHICK	Uncharacterized protein OS=Gallus gallus GN=RCJMB04_4h19 PE=2 SV=1	77	23260	45.7	2566	1	0	0	3161929	0
6	2	2::Q5ZLX9_CHICK	Uncharacterized protein OS=Gallus gallus GN=RCJMB04_4h19 PE=2 SV=1	77	23260	45.7	2567	1	0	0	3161929	0
6	2	2::Q5ZLX9_CHICK	Uncharacterized protein OS=Gallus gallus GN=RCJMB04_4h19 PE=2 SV=1	77	23260	45.7	2645	1	0	0	3226903	0
6	2	2::Q5ZLX9_CHICK	Uncharacterized protein OS=Gallus gallus GN=RCJMB04_4h19 PE=2 SV=1	77	23260	45.7	2647	1	0	0	3226904	0
6	2	2::Q5ZLX9_CHICK	Uncharacterized protein OS=Gallus gallus GN=RCJMB04_4h19 PE=2 SV=1	77	23260	45.7	2650	2	0	0	3227211	0
6	2	2::Q5ZLX9_CHICK	Uncharacterized protein OS=Gallus gallus GN=RCJMB04_4h19 PE=2 SV=1	77	23260	45.7	2651	2	0	0	3227214	0
6	2	2::Q5ZLX9_CHICK	Uncharacterized protein OS=Gallus gallus GN=RCJMB04_4h19 PE=2 SV=1	77	23260	45.7	2653	1	0	0	3227214	0
6	2	2::Q5ZLX9_CHICK	Uncharacterized protein OS=Gallus gallus GN=RCJMB04_4h19 PE=2 SV=1	77	23260	45.7	6347	1	0	0	4887288	0
6	2	2::Q5ZLX9_CHICK	Uncharacterized protein OS=Gallus gallus GN=RCJMB04_4h19 PE=2 SV=1	77	23260	45.7	6348	1	0	0	4887288	0
6	2	2::Q5ZLX9_CHICK	Uncharacterized protein OS=Gallus gallus GN=RCJMB04_4h19 PE=2 SV=1	77	23260	45.7	6349	1	0	0	4887289	0
6	2	2::Q5ZLX9_CHICK	Uncharacterized protein OS=Gallus gallus GN=RCJMB04_4h19 PE=2 SV=1	77	23260	45.7	6528	1	0	0	4997480	0
6	2	2::Q5ZLX9_CHICK	Uncharacterized protein OS=Gallus gallus GN=RCJMB04_4h19 PE=2 SV=1	77	23260	45.7	6529	1	0	0	4997483	0
6	2	2::Q5ZLX9_CHICK	Uncharacterized protein OS=Gallus gallus GN=RCJMB04_4h19 PE=2 SV=1	77	23260	45.7	6647	1	0	0	5077458	0
6	2	2::Q5ZLX9_CHICK	Uncharacterized protein OS=Gallus gallus GN=RCJMB04_4h19 PE=2 SV=1	77	23260	45.7	6648	1	0	0	5077458	0
6	2	2::Q5ZLX9_CHICK	Uncharacterized protein OS=Gallus gallus GN=RCJMB04_4h19 PE=2 SV=1	77	23260	45.7	7652	1	0	1	5667683	0
6	2	2::Q5ZLX9_CHICK	Uncharacterized protein OS=Gallus gallus GN=RCJMB04_4h19 PE=2 SV=1	77	23260	45.7	7653	1	0	1	5667683	0
6	2	2::Q5ZLX9_CHICK	Uncharacterized protein OS=Gallus gallus GN=RCJMB04_4h19 PE=2 SV=1	77	23260	45.7	7995	1	0	0	5862897	0
6	2	2::Q5ZLX9_CHICK	Uncharacterized protein OS=Gallus gallus GN=RCJMB04_4h19 PE=2 SV=1	77	23260	45.7	7996	1	0	0	3911957	0
6	2	2::Q5ZLX9_CHICK	Uncharacterized protein OS=Gallus gallus GN=RCJMB04_4h19 PE=2 SV=1	77	23260	45.7	7997	1	0	0	5862902	0
6	2	2::Q5ZLX9_CHICK	Uncharacterized protein OS=Gallus gallus GN=RCJMB04_4h19 PE=2 SV=1	77	23260	45.7	7998	1	0	0	3911959	0
6	2	2::Q5ZLX9_CHICK	Uncharacterized protein OS=Gallus gallus GN=RCJMB04_4h19 PE=2 SV=1	77	23260	45.7	8203	1	0	0	5997654	0
6	2	2::Q5ZLX9_CHICK	Uncharacterized protein OS=Gallus gallus GN=RCJMB04_4h19 PE=2 SV=1	77	23260	45.7	8204	1	0	0	5997655	0
6	2	2::Q5ZLX9_CHICK	Uncharacterized protein OS=Gallus gallus GN=RCJMB04_4h19 PE=2 SV=1	77	23260	45.7	8205	1	0	0	5997657	0
6	2	2::Q5ZLX9_CHICK	Uncharacterized protein OS=Gallus gallus GN=RCJMB04_4h19 PE=2 SV=1	77	23260	45.7	10606	1	0	1	3796940	0
6	2	2::Q5ZLX9_CHICK	Uncharacterized protein OS=Gallus gallus GN=RCJMB04_4h19 PE=2 SV=1	77	23260	45.7	10607	1	0	1	5059231	0
6	2	2::Q5ZLX9_CHICK	Uncharacterized protein OS=Gallus gallus GN=RCJMB04_4h19 PE=2 SV=1	77	23260	45.7	10608	1	0	1	5059235	0
6	2	2::Q5ZLX9_CHICK	Uncharacterized protein OS=Gallus gallus GN=RCJMB04_4h19 PE=2 SV=1	77	23260	45.7	13386	1	0	1	9775366	0
6	2	2::Q5ZLX9_CHICK	Uncharacterized protein OS=Gallus gallus GN=RCJMB04_4h19 PE=2 SV=1	77	23260	45.7	13387	1	0	1	4892722	0
6	2	2::Q5ZLX9_CHICK	Uncharacterized protein OS=Gallus gallus GN=RCJMB04_4h19 PE=2 SV=1	77	23260	45.7	13388	1	0	1	6520272	0
6	2	2::Q5ZLX9_CHICK	Uncharacterized protein OS=Gallus gallus GN=RCJMB04_4h19 PE=2 SV=1	77	23260	45.7	13389	1	0	1	6520276	0
6	2	2::Q5ZLX9_CHICK	Uncharacterized protein OS=Gallus gallus GN=RCJMB04_4h19 PE=2 SV=1	77	23260	45.7	13390	1	0	1	9775378	0
6	2	2::Q5ZLX9_CHICK	Uncharacterized protein OS=Gallus gallus GN=RCJMB04_4h19 PE=2 SV=1	77	23260	45.7	13391	1	0	1	6520281	0
6	2	2::Q5ZLX9_CHICK	Uncharacterized protein OS=Gallus gallus GN=RCJMB04_4h19 PE=2 SV=1	77	23260	45.7	13392	1	0	1	4892729	0
6	2	2::Q5ZLX9_CHICK	Uncharacterized protein OS=Gallus gallus GN=RCJMB04_4h19 PE=2 SV=1	77	23260	45.7	13393	1	0	1	9775387	0
6	2	2::Q5ZLX9_CHICK	Uncharacterized protein OS=Gallus gallus GN=RCJMB04_4h19 PE=2 SV=1	77	23260	45.7	13394	1	0	1	6520289	0
6	2	2::Q5ZLX9_CHICK	Uncharacterized protein OS=Gallus gallus GN=RCJMB04_4h19 PE=2 SV=1	77	23260	45.7	15858	1	0	1	6911637	1	emPAI	0.81
6		2::F1N8P3_CHICK	Uncharacterized protein OS=Gallus gallus GN=ACTBL2 PE=3 SV=2	295	41987	34.2	2564	1	0	0	3161928	0
6		2::F1N8P3_CHICK	Uncharacterized protein OS=Gallus gallus GN=ACTBL2 PE=3 SV=2	295	41987	34.2	2565	1	0	0	3161928	0
6		2::F1N8P3_CHICK	Uncharacterized protein OS=Gallus gallus GN=ACTBL2 PE=3 SV=2	295	41987	34.2	2566	1	0	0	3161929	0
6		2::F1N8P3_CHICK	Uncharacterized protein OS=Gallus gallus GN=ACTBL2 PE=3 SV=2	295	41987	34.2	2567	1	0	0	3161929	0
6		2::F1N8P3_CHICK	Uncharacterized protein OS=Gallus gallus GN=ACTBL2 PE=3 SV=2	295	41987	34.2	2645	1	0	0	3226903	0
6		2::F1N8P3_CHICK	Uncharacterized protein OS=Gallus gallus GN=ACTBL2 PE=3 SV=2	295	41987	34.2	2647	1	0	0	3226904	0
6		2::F1N8P3_CHICK	Uncharacterized protein OS=Gallus gallus GN=ACTBL2 PE=3 SV=2	295	41987	34.2	2650	2	0	0	3227211	0
6		2::F1N8P3_CHICK	Uncharacterized protein OS=Gallus gallus GN=ACTBL2 PE=3 SV=2	295	41987	34.2	2651	2	0	0	3227214	0
6		2::F1N8P3_CHICK	Uncharacterized protein OS=Gallus gallus GN=ACTBL2 PE=3 SV=2	295	41987	34.2	2653	1	0	0	3227214	0
6		2::F1N8P3_CHICK	Uncharacterized protein OS=Gallus gallus GN=ACTBL2 PE=3 SV=2	295	41987	34.2	6347	1	0	0	4887288	0
6		2::F1N8P3_CHICK	Uncharacterized protein OS=Gallus gallus GN=ACTBL2 PE=3 SV=2	295	41987	34.2	6348	1	0	0	4887288	0
6		2::F1N8P3_CHICK	Uncharacterized protein OS=Gallus gallus GN=ACTBL2 PE=3 SV=2	295	41987	34.2	6349	1	0	0	4887289	0
6		2::F1N8P3_CHICK	Uncharacterized protein OS=Gallus gallus GN=ACTBL2 PE=3 SV=2	295	41987	34.2	6528	1	0	0	4997480	0
6		2::F1N8P3_CHICK	Uncharacterized protein OS=Gallus gallus GN=ACTBL2 PE=3 SV=2	295	41987	34.2	6529	1	0	0	4997483	0
6		2::F1N8P3_CHICK	Uncharacterized protein OS=Gallus gallus GN=ACTBL2 PE=3 SV=2	295	41987	34.2	6647	1	0	0	5077458	0
6		2::F1N8P3_CHICK	Uncharacterized protein OS=Gallus gallus GN=ACTBL2 PE=3 SV=2	295	41987	34.2	6648	1	0	0	5077458	0
6		2::F1N8P3_CHICK	Uncharacterized protein OS=Gallus gallus GN=ACTBL2 PE=3 SV=2	295	41987	34.2	7894	1	0	1	5813141	0
6		2::F1N8P3_CHICK	Uncharacterized protein OS=Gallus gallus GN=ACTBL2 PE=3 SV=2	295	41987	34.2	7895	1	0	1	5813148	0
6		2::F1N8P3_CHICK	Uncharacterized protein OS=Gallus gallus GN=ACTBL2 PE=3 SV=2	295	41987	34.2	7995	1	0	0	5862897	0
6		2::F1N8P3_CHICK	Uncharacterized protein OS=Gallus gallus GN=ACTBL2 PE=3 SV=2	295	41987	34.2	7996	1	0	0	3911957	0
6		2::F1N8P3_CHICK	Uncharacterized protein OS=Gallus gallus GN=ACTBL2 PE=3 SV=2	295	41987	34.2	7997	1	0	0	5862902	0
6		2::F1N8P3_CHICK	Uncharacterized protein OS=Gallus gallus GN=ACTBL2 PE=3 SV=2	295	41987	34.2	7998	1	0	0	3911959	0
6		2::F1N8P3_CHICK	Uncharacterized protein OS=Gallus gallus GN=ACTBL2 PE=3 SV=2	295	41987	34.2	8061	1	0	1	5893115	0
6		2::F1N8P3_CHICK	Uncharacterized protein OS=Gallus gallus GN=ACTBL2 PE=3 SV=2	295	41987	34.2	8062	1	0	1	5893121	0
6		2::F1N8P3_CHICK	Uncharacterized protein OS=Gallus gallus GN=ACTBL2 PE=3 SV=2	295	41987	34.2	8203	1	0	0	5997654	0
6		2::F1N8P3_CHICK	Uncharacterized protein OS=Gallus gallus GN=ACTBL2 PE=3 SV=2	295	41987	34.2	8204	1	0	0	5997655	0
6		2::F1N8P3_CHICK	Uncharacterized protein OS=Gallus gallus GN=ACTBL2 PE=3 SV=2	295	41987	34.2	8205	1	0	0	5997657	0
6		2::F1N8P3_CHICK	Uncharacterized protein OS=Gallus gallus GN=ACTBL2 PE=3 SV=2	295	41987	34.2	12558	1	0	1	8959505	0
6		2::F1N8P3_CHICK	Uncharacterized protein OS=Gallus gallus GN=ACTBL2 PE=3 SV=2	295	41987	34.2	12559	1	0	1	8959512	0
6		2::F1N8P3_CHICK	Uncharacterized protein OS=Gallus gallus GN=ACTBL2 PE=3 SV=2	295	41987	34.2	12560	1	0	1	5976367	0
6		2::F1N8P3_CHICK	Uncharacterized protein OS=Gallus gallus GN=ACTBL2 PE=3 SV=2	295	41987	34.2	12561	1	0	1	5976368	0
6		2::F1N8P3_CHICK	Uncharacterized protein OS=Gallus gallus GN=ACTBL2 PE=3 SV=2	295	41987	34.2	12562	1	0	1	8959524	0
6		2::F1N8P3_CHICK	Uncharacterized protein OS=Gallus gallus GN=ACTBL2 PE=3 SV=2	295	41987	34.2	12563	1	0	1	8959526	0
6		2::F1N8P3_CHICK	Uncharacterized protein OS=Gallus gallus GN=ACTBL2 PE=3 SV=2	295	41987	34.2	12564	1	0	1	5976375	0
6		2::F1N8P3_CHICK	Uncharacterized protein OS=Gallus gallus GN=ACTBL2 PE=3 SV=2	295	41987	34.2	12565	1	0	1	5976376	0
6		2::F1N8P3_CHICK	Uncharacterized protein OS=Gallus gallus GN=ACTBL2 PE=3 SV=2	295	41987	34.2	12566	1	0	1	5976377	0
6		2::F1N8P3_CHICK	Uncharacterized protein OS=Gallus gallus GN=ACTBL2 PE=3 SV=2	295	41987	34.2	12568	1	0	1	8964434	0
6		2::F1N8P3_CHICK	Uncharacterized protein OS=Gallus gallus GN=ACTBL2 PE=3 SV=2	295	41987	34.2	12569	1	0	1	5979652	0
6		2::F1N8P3_CHICK	Uncharacterized protein OS=Gallus gallus GN=ACTBL2 PE=3 SV=2	295	41987	34.2	13419	1	0	1	6543097	0
6		2::F1N8P3_CHICK	Uncharacterized protein OS=Gallus gallus GN=ACTBL2 PE=3 SV=2	295	41987	34.2	13420	1	0	1	9809613	0
6		2::F1N8P3_CHICK	Uncharacterized protein OS=Gallus gallus GN=ACTBL2 PE=3 SV=2	295	41987	34.2	13421	1	0	1	6543102	0
6		2::F1N8P3_CHICK	Uncharacterized protein OS=Gallus gallus GN=ACTBL2 PE=3 SV=2	295	41987	34.2	13422	1	0	1	9809622	0
6		2::F1N8P3_CHICK	Uncharacterized protein OS=Gallus gallus GN=ACTBL2 PE=3 SV=2	295	41987	34.2	13423	1	0	1	6543107	0
6		2::F1N8P3_CHICK	Uncharacterized protein OS=Gallus gallus GN=ACTBL2 PE=3 SV=2	295	41987	34.2	13486	1	0	1	6596421	0
6		2::F1N8P3_CHICK	Uncharacterized protein OS=Gallus gallus GN=ACTBL2 PE=3 SV=2	295	41987	34.2	13487	1	0	1	6596424	0
6		2::F1N8P3_CHICK	Uncharacterized protein OS=Gallus gallus GN=ACTBL2 PE=3 SV=2	295	41987	34.2	15858	3	0	1	6911637	1
6		2::B5M200_CHICK	Beta-actin (Fragment) OS=Gallus gallus PE=2 SV=1	70	10241	53.8	2650	2	0	0	3227211	0
6		2::B5M200_CHICK	Beta-actin (Fragment) OS=Gallus gallus PE=2 SV=1	70	10241	53.8	2651	2	0	0	3227214	0
6		2::B5M200_CHICK	Beta-actin (Fragment) OS=Gallus gallus PE=2 SV=1	70	10241	53.8	2653	1	0	0	3227214	0
6		2::B5M200_CHICK	Beta-actin (Fragment) OS=Gallus gallus PE=2 SV=1	70	10241	53.8	6347	1	0	0	4887288	0
6		2::B5M200_CHICK	Beta-actin (Fragment) OS=Gallus gallus PE=2 SV=1	70	10241	53.8	6348	1	0	0	4887288	0
6		2::B5M200_CHICK	Beta-actin (Fragment) OS=Gallus gallus PE=2 SV=1	70	10241	53.8	6349	1	0	0	4887289	0
6		2::B5M200_CHICK	Beta-actin (Fragment) OS=Gallus gallus PE=2 SV=1	70	10241	53.8	7995	1	0	0	5862897	0
6		2::B5M200_CHICK	Beta-actin (Fragment) OS=Gallus gallus PE=2 SV=1	70	10241	53.8	7996	1	0	0	3911957	0
6		2::B5M200_CHICK	Beta-actin (Fragment) OS=Gallus gallus PE=2 SV=1	70	10241	53.8	7997	1	0	0	5862902	0
6		2::B5M200_CHICK	Beta-actin (Fragment) OS=Gallus gallus PE=2 SV=1	70	10241	53.8	7998	1	0	0	3911959	0
6		2::B5M200_CHICK	Beta-actin (Fragment) OS=Gallus gallus PE=2 SV=1	70	10241	53.8	8203	1	0	0	5997654	0
6		2::B5M200_CHICK	Beta-actin (Fragment) OS=Gallus gallus PE=2 SV=1	70	10241	53.8	8204	1	0	0	5997655	0
6		2::B5M200_CHICK	Beta-actin (Fragment) OS=Gallus gallus PE=2 SV=1	70	10241	53.8	8205	1	0	0	5997657	0
6		2::B5M200_CHICK	Beta-actin (Fragment) OS=Gallus gallus PE=2 SV=1	70	10241	53.8	10606	1	0	1	3796940	0
6		2::B5M200_CHICK	Beta-actin (Fragment) OS=Gallus gallus PE=2 SV=1	70	10241	53.8	10607	1	0	1	5059231	0
6		2::B5M200_CHICK	Beta-actin (Fragment) OS=Gallus gallus PE=2 SV=1	70	10241	53.8	10608	1	0	1	5059235	0
6		2::A9YXX2_CHICK	Beta-actin (Fragment) OS=Gallus gallus PE=2 SV=1	43	9841	33.3	10606	1	0	1	3796940	0
6		2::A9YXX2_CHICK	Beta-actin (Fragment) OS=Gallus gallus PE=2 SV=1	43	9841	33.3	10607	1	0	1	5059231	0
6		2::A9YXX2_CHICK	Beta-actin (Fragment) OS=Gallus gallus PE=2 SV=1	43	9841	33.3	10608	1	0	1	5059235	0
6		2::A9YXX2_CHICK	Beta-actin (Fragment) OS=Gallus gallus PE=2 SV=1	43	9841	33.3	13386	1	0	1	9775366	0
6		2::A9YXX2_CHICK	Beta-actin (Fragment) OS=Gallus gallus PE=2 SV=1	43	9841	33.3	13387	1	0	1	4892722	0
6		2::A9YXX2_CHICK	Beta-actin (Fragment) OS=Gallus gallus PE=2 SV=1	43	9841	33.3	13388	1	0	1	6520272	0
6		2::A9YXX2_CHICK	Beta-actin (Fragment) OS=Gallus gallus PE=2 SV=1	43	9841	33.3	13389	1	0	1	6520276	0
6		2::A9YXX2_CHICK	Beta-actin (Fragment) OS=Gallus gallus PE=2 SV=1	43	9841	33.3	13390	1	0	1	9775378	0
6		2::A9YXX2_CHICK	Beta-actin (Fragment) OS=Gallus gallus PE=2 SV=1	43	9841	33.3	13391	1	0	1	6520281	0
6		2::A9YXX2_CHICK	Beta-actin (Fragment) OS=Gallus gallus PE=2 SV=1	43	9841	33.3	13392	1	0	1	4892729	0
6		2::A9YXX2_CHICK	Beta-actin (Fragment) OS=Gallus gallus PE=2 SV=1	43	9841	33.3	13393	1	0	1	9775387	0
6		2::A9YXX2_CHICK	Beta-actin (Fragment) OS=Gallus gallus PE=2 SV=1	43	9841	33.3	13394	1	0	1	6520289	0
6		2::A9YXX2_CHICK	Beta-actin (Fragment) OS=Gallus gallus PE=2 SV=1	43	9841	33.3	15858	1	0	1	6911637	1
6		2::G8HUH5_CHICK	Beta-actin (Fragment) OS=Gallus gallus GN=Bact PE=2 SV=1	42	10508	30.8	2650	2	0	0	3227211	0
6		2::G8HUH5_CHICK	Beta-actin (Fragment) OS=Gallus gallus GN=Bact PE=2 SV=1	42	10508	30.8	2651	2	0	0	3227214	0
6		2::G8HUH5_CHICK	Beta-actin (Fragment) OS=Gallus gallus GN=Bact PE=2 SV=1	42	10508	30.8	2653	1	0	0	3227214	0
6		2::G8HUH5_CHICK	Beta-actin (Fragment) OS=Gallus gallus GN=Bact PE=2 SV=1	42	10508	30.8	8203	1	0	0	5997654	0
6		2::G8HUH5_CHICK	Beta-actin (Fragment) OS=Gallus gallus GN=Bact PE=2 SV=1	42	10508	30.8	8204	1	0	0	5997655	0
6		2::G8HUH5_CHICK	Beta-actin (Fragment) OS=Gallus gallus GN=Bact PE=2 SV=1	42	10508	30.8	8205	1	0	0	5997657	0
6		2::G8HUH5_CHICK	Beta-actin (Fragment) OS=Gallus gallus GN=Bact PE=2 SV=1	42	10508	30.8	10606	1	0	1	3796940	0
6		2::G8HUH5_CHICK	Beta-actin (Fragment) OS=Gallus gallus GN=Bact PE=2 SV=1	42	10508	30.8	10607	1	0	1	5059231	0
6		2::G8HUH5_CHICK	Beta-actin (Fragment) OS=Gallus gallus GN=Bact PE=2 SV=1	42	10508	30.8	10608	1	0	1	5059235	0
6		2::G4WW42_CHICK	Beta-actin (Fragment) OS=Gallus gallus PE=2 SV=1	39	16003	28.3	2645	1	0	0	3226903	0
6		2::G4WW42_CHICK	Beta-actin (Fragment) OS=Gallus gallus PE=2 SV=1	39	16003	28.3	2647	1	0	0	3226904	0
6		2::G4WW42_CHICK	Beta-actin (Fragment) OS=Gallus gallus PE=2 SV=1	39	16003	28.3	7652	1	0	1	5667683	0
6		2::G4WW42_CHICK	Beta-actin (Fragment) OS=Gallus gallus PE=2 SV=1	39	16003	28.3	7653	1	0	1	5667683	0
6		2::G4WW42_CHICK	Beta-actin (Fragment) OS=Gallus gallus PE=2 SV=1	39	16003	28.3	15051	1	0	1	8317241	0
6		2::G4WW42_CHICK	Beta-actin (Fragment) OS=Gallus gallus PE=2 SV=1	39	16003	28.3	15427	1	0	1	6928217	1
7	1	2::F1P360_CHICK	Uncharacterized protein OS=Gallus gallus GN=CKAP4 PE=4 SV=2	278	56788	62.5	2949	1	1	1	3386801	0
7	1	2::F1P360_CHICK	Uncharacterized protein OS=Gallus gallus GN=CKAP4 PE=4 SV=2	278	56788	62.5	3318	1	0	1	3527132	0
7	1	2::F1P360_CHICK	Uncharacterized protein OS=Gallus gallus GN=CKAP4 PE=4 SV=2	278	56788	62.5	3319	1	0	1	3527134	0
7	1	2::F1P360_CHICK	Uncharacterized protein OS=Gallus gallus GN=CKAP4 PE=4 SV=2	278	56788	62.5	3320	1	0	1	3527134	0
7	1	2::F1P360_CHICK	Uncharacterized protein OS=Gallus gallus GN=CKAP4 PE=4 SV=2	278	56788	62.5	3321	1	0	1	3527135	0
7	1	2::F1P360_CHICK	Uncharacterized protein OS=Gallus gallus GN=CKAP4 PE=4 SV=2	278	56788	62.5	3322	1	0	1	3527136	0
7	1	2::F1P360_CHICK	Uncharacterized protein OS=Gallus gallus GN=CKAP4 PE=4 SV=2	278	56788	62.5	3323	1	0	1	3527136	0
7	1	2::F1P360_CHICK	Uncharacterized protein OS=Gallus gallus GN=CKAP4 PE=4 SV=2	278	56788	62.5	3432	2	1	1	3597031	0
7	1	2::F1P360_CHICK	Uncharacterized protein OS=Gallus gallus GN=CKAP4 PE=4 SV=2	278	56788	62.5	4305	1	1	1	4032070	0
7	1	2::F1P360_CHICK	Uncharacterized protein OS=Gallus gallus GN=CKAP4 PE=4 SV=2	278	56788	62.5	4400	1	1	1	4087457	0
7	1	2::F1P360_CHICK	Uncharacterized protein OS=Gallus gallus GN=CKAP4 PE=4 SV=2	278	56788	62.5	4789	3	1	1	4282329	0
7	1	2::F1P360_CHICK	Uncharacterized protein OS=Gallus gallus GN=CKAP4 PE=4 SV=2	278	56788	62.5	4790	4	1	1	4282330	0
7	1	2::F1P360_CHICK	Uncharacterized protein OS=Gallus gallus GN=CKAP4 PE=4 SV=2	278	56788	62.5	4831	1	1	1	4292593	0
7	1	2::F1P360_CHICK	Uncharacterized protein OS=Gallus gallus GN=CKAP4 PE=4 SV=2	278	56788	62.5	6198	4	1	1	4802318	0
7	1	2::F1P360_CHICK	Uncharacterized protein OS=Gallus gallus GN=CKAP4 PE=4 SV=2	278	56788	62.5	6199	4	1	1	4802319	0
7	1	2::F1P360_CHICK	Uncharacterized protein OS=Gallus gallus GN=CKAP4 PE=4 SV=2	278	56788	62.5	7333	1	1	1	3658741	0
7	1	2::F1P360_CHICK	Uncharacterized protein OS=Gallus gallus GN=CKAP4 PE=4 SV=2	278	56788	62.5	7334	1	1	1	3658742	0
7	1	2::F1P360_CHICK	Uncharacterized protein OS=Gallus gallus GN=CKAP4 PE=4 SV=2	278	56788	62.5	7335	1	1	1	5483077	0
7	1	2::F1P360_CHICK	Uncharacterized protein OS=Gallus gallus GN=CKAP4 PE=4 SV=2	278	56788	62.5	7542	1	1	1	5617665	0
7	1	2::F1P360_CHICK	Uncharacterized protein OS=Gallus gallus GN=CKAP4 PE=4 SV=2	278	56788	62.5	7917	1	1	1	5827920	0
7	1	2::F1P360_CHICK	Uncharacterized protein OS=Gallus gallus GN=CKAP4 PE=4 SV=2	278	56788	62.5	7918	1	1	1	5827926	0
7	1	2::F1P360_CHICK	Uncharacterized protein OS=Gallus gallus GN=CKAP4 PE=4 SV=2	278	56788	62.5	8336	1	1	1	4052071	0
7	1	2::F1P360_CHICK	Uncharacterized protein OS=Gallus gallus GN=CKAP4 PE=4 SV=2	278	56788	62.5	8344	1	1	1	6077646	0
7	1	2::F1P360_CHICK	Uncharacterized protein OS=Gallus gallus GN=CKAP4 PE=4 SV=2	278	56788	62.5	9410	1	1	1	6763296	0
7	1	2::F1P360_CHICK	Uncharacterized protein OS=Gallus gallus GN=CKAP4 PE=4 SV=2	278	56788	62.5	9678	1	1	1	6933870	0
7	1	2::F1P360_CHICK	Uncharacterized protein OS=Gallus gallus GN=CKAP4 PE=4 SV=2	278	56788	62.5	9680	1	1	1	4625939	0
7	1	2::F1P360_CHICK	Uncharacterized protein OS=Gallus gallus GN=CKAP4 PE=4 SV=2	278	56788	62.5	9798	1	1	1	7018453	0
7	1	2::F1P360_CHICK	Uncharacterized protein OS=Gallus gallus GN=CKAP4 PE=4 SV=2	278	56788	62.5	10056	1	1	1	7203378	0
7	1	2::F1P360_CHICK	Uncharacterized protein OS=Gallus gallus GN=CKAP4 PE=4 SV=2	278	56788	62.5	10215	1	1	1	7308704	0
7	1	2::F1P360_CHICK	Uncharacterized protein OS=Gallus gallus GN=CKAP4 PE=4 SV=2	278	56788	62.5	10216	1	1	1	4875830	0
7	1	2::F1P360_CHICK	Uncharacterized protein OS=Gallus gallus GN=CKAP4 PE=4 SV=2	278	56788	62.5	10217	1	1	1	7308709	0
7	1	2::F1P360_CHICK	Uncharacterized protein OS=Gallus gallus GN=CKAP4 PE=4 SV=2	278	56788	62.5	11216	1	1	1	5312443	0
7	1	2::F1P360_CHICK	Uncharacterized protein OS=Gallus gallus GN=CKAP4 PE=4 SV=2	278	56788	62.5	11217	1	1	1	7968640	0
7	1	2::F1P360_CHICK	Uncharacterized protein OS=Gallus gallus GN=CKAP4 PE=4 SV=2	278	56788	62.5	11526	1	1	1	5459215	0
7	1	2::F1P360_CHICK	Uncharacterized protein OS=Gallus gallus GN=CKAP4 PE=4 SV=2	278	56788	62.5	11527	1	1	1	8183788	0
7	1	2::F1P360_CHICK	Uncharacterized protein OS=Gallus gallus GN=CKAP4 PE=4 SV=2	278	56788	62.5	11589	1	1	1	8229278	0
7	1	2::F1P360_CHICK	Uncharacterized protein OS=Gallus gallus GN=CKAP4 PE=4 SV=2	278	56788	62.5	11590	1	1	1	5489545	0
7	1	2::F1P360_CHICK	Uncharacterized protein OS=Gallus gallus GN=CKAP4 PE=4 SV=2	278	56788	62.5	12165	1	1	1	5756091	1
7	1	2::F1P360_CHICK	Uncharacterized protein OS=Gallus gallus GN=CKAP4 PE=4 SV=2	278	56788	62.5	12213	1	1	1	8654023	0
7	1	2::F1P360_CHICK	Uncharacterized protein OS=Gallus gallus GN=CKAP4 PE=4 SV=2	278	56788	62.5	12214	1	1	1	5772709	0
7	1	2::F1P360_CHICK	Uncharacterized protein OS=Gallus gallus GN=CKAP4 PE=4 SV=2	278	56788	62.5	12236	1	1	1	8674470	0
7	1	2::F1P360_CHICK	Uncharacterized protein OS=Gallus gallus GN=CKAP4 PE=4 SV=2	278	56788	62.5	12237	1	1	1	5786338	0
7	1	2::F1P360_CHICK	Uncharacterized protein OS=Gallus gallus GN=CKAP4 PE=4 SV=2	278	56788	62.5	12238	1	1	1	5786340	0
7	1	2::F1P360_CHICK	Uncharacterized protein OS=Gallus gallus GN=CKAP4 PE=4 SV=2	278	56788	62.5	13376	1	1	1	9769652	0
7	1	2::F1P360_CHICK	Uncharacterized protein OS=Gallus gallus GN=CKAP4 PE=4 SV=2	278	56788	62.5	13377	1	1	1	6516463	0
7	1	2::F1P360_CHICK	Uncharacterized protein OS=Gallus gallus GN=CKAP4 PE=4 SV=2	278	56788	62.5	13965	1	1	1	7036798	1
7	1	2::F1P360_CHICK	Uncharacterized protein OS=Gallus gallus GN=CKAP4 PE=4 SV=2	278	56788	62.5	15365	1	1	1	6798457	0
7	1	2::F1P360_CHICK	Uncharacterized protein OS=Gallus gallus GN=CKAP4 PE=4 SV=2	278	56788	62.5	15366	1	1	1	9061256	0
7	1	2::F1P360_CHICK	Uncharacterized protein OS=Gallus gallus GN=CKAP4 PE=4 SV=2	278	56788	62.5	15534	1	1	1	9571531	0	emPAI	1.01
8	1	2::G1K342_CHICK	Uncharacterized protein (Fragment) OS=Gallus gallus PE=3 SV=2	276	43481	29.6	4330	1	1	0	4046782	0
8	1	2::G1K342_CHICK	Uncharacterized protein (Fragment) OS=Gallus gallus PE=3 SV=2	276	43481	29.6	6865	1	1	0	5203011	0
8	1	2::G1K342_CHICK	Uncharacterized protein (Fragment) OS=Gallus gallus PE=3 SV=2	276	43481	29.6	6866	1	1	0	5203011	0
8	1	2::G1K342_CHICK	Uncharacterized protein (Fragment) OS=Gallus gallus PE=3 SV=2	276	43481	29.6	7174	1	1	0	3598494	1
8	1	2::G1K342_CHICK	Uncharacterized protein (Fragment) OS=Gallus gallus PE=3 SV=2	276	43481	29.6	7175	1	1	0	3598495	1
8	1	2::G1K342_CHICK	Uncharacterized protein (Fragment) OS=Gallus gallus PE=3 SV=2	276	43481	29.6	7176	1	1	0	5392709	1
8	1	2::G1K342_CHICK	Uncharacterized protein (Fragment) OS=Gallus gallus PE=3 SV=2	276	43481	29.6	8492	1	1	0	6153045	0
8	1	2::G1K342_CHICK	Uncharacterized protein (Fragment) OS=Gallus gallus PE=3 SV=2	276	43481	29.6	10104	1	1	0	7238463	0
8	1	2::G1K342_CHICK	Uncharacterized protein (Fragment) OS=Gallus gallus PE=3 SV=2	276	43481	29.6	10105	1	1	0	4829023	0
8	1	2::G1K342_CHICK	Uncharacterized protein (Fragment) OS=Gallus gallus PE=3 SV=2	276	43481	29.6	11399	1	1	1	8084229	0
8	1	2::G1K342_CHICK	Uncharacterized protein (Fragment) OS=Gallus gallus PE=3 SV=2	276	43481	29.6	11400	1	1	1	5392844	0
8	1	2::G1K342_CHICK	Uncharacterized protein (Fragment) OS=Gallus gallus PE=3 SV=2	276	43481	29.6	11401	1	1	1	8084232	0
8	1	2::G1K342_CHICK	Uncharacterized protein (Fragment) OS=Gallus gallus PE=3 SV=2	276	43481	29.6	11402	1	1	1	5392852	0
8	1	2::G1K342_CHICK	Uncharacterized protein (Fragment) OS=Gallus gallus PE=3 SV=2	276	43481	29.6	11403	1	1	1	8084248	0
8	1	2::G1K342_CHICK	Uncharacterized protein (Fragment) OS=Gallus gallus PE=3 SV=2	276	43481	29.6	11429	1	1	0	5409521	0
8	1	2::G1K342_CHICK	Uncharacterized protein (Fragment) OS=Gallus gallus PE=3 SV=2	276	43481	29.6	11682	1	1	1	8304532	0
8	1	2::G1K342_CHICK	Uncharacterized protein (Fragment) OS=Gallus gallus PE=3 SV=2	276	43481	29.6	11683	1	1	1	8304533	0
8	1	2::G1K342_CHICK	Uncharacterized protein (Fragment) OS=Gallus gallus PE=3 SV=2	276	43481	29.6	11684	1	1	1	5539714	0
8	1	2::G1K342_CHICK	Uncharacterized protein (Fragment) OS=Gallus gallus PE=3 SV=2	276	43481	29.6	11685	1	1	1	5539715	0
8	1	2::G1K342_CHICK	Uncharacterized protein (Fragment) OS=Gallus gallus PE=3 SV=2	276	43481	29.6	11686	1	1	1	8304537	0
8	1	2::G1K342_CHICK	Uncharacterized protein (Fragment) OS=Gallus gallus PE=3 SV=2	276	43481	29.6	11688	1	1	1	8304540	0
8	1	2::G1K342_CHICK	Uncharacterized protein (Fragment) OS=Gallus gallus PE=3 SV=2	276	43481	29.6	11689	1	1	1	5539718	0
8	1	2::G1K342_CHICK	Uncharacterized protein (Fragment) OS=Gallus gallus PE=3 SV=2	276	43481	29.6	11690	1	1	1	5539720	0
8	1	2::G1K342_CHICK	Uncharacterized protein (Fragment) OS=Gallus gallus PE=3 SV=2	276	43481	29.6	11907	1	1	0	5662829	0
8	1	2::G1K342_CHICK	Uncharacterized protein (Fragment) OS=Gallus gallus PE=3 SV=2	276	43481	29.6	11908	1	1	0	8489217	0
8	1	2::G1K342_CHICK	Uncharacterized protein (Fragment) OS=Gallus gallus PE=3 SV=2	276	43481	29.6	11909	1	1	0	5662838	0
8	1	2::G1K342_CHICK	Uncharacterized protein (Fragment) OS=Gallus gallus PE=3 SV=2	276	43481	29.6	13405	1	1	0	6536666	0
8	1	2::G1K342_CHICK	Uncharacterized protein (Fragment) OS=Gallus gallus PE=3 SV=2	276	43481	29.6	13406	1	1	0	6536669	0
8	1	2::G1K342_CHICK	Uncharacterized protein (Fragment) OS=Gallus gallus PE=3 SV=2	276	43481	29.6	13407	1	1	0	4905020	0
8	1	2::G1K342_CHICK	Uncharacterized protein (Fragment) OS=Gallus gallus PE=3 SV=2	276	43481	29.6	13408	1	1	0	4905021	0
8	1	2::G1K342_CHICK	Uncharacterized protein (Fragment) OS=Gallus gallus PE=3 SV=2	276	43481	29.6	13409	1	1	0	9799971	0
8	1	2::G1K342_CHICK	Uncharacterized protein (Fragment) OS=Gallus gallus PE=3 SV=2	276	43481	29.6	13410	1	1	0	6536673	0
8	1	2::G1K342_CHICK	Uncharacterized protein (Fragment) OS=Gallus gallus PE=3 SV=2	276	43481	29.6	13412	1	1	0	9799980	0	emPAI	0.68
8	2	2::F1NYB1_CHICK	Uncharacterized protein OS=Gallus gallus GN=TUBB4B PE=3 SV=2	202	49829	34.6	4330	1	0	0	4046782	0
8	2	2::F1NYB1_CHICK	Uncharacterized protein OS=Gallus gallus GN=TUBB4B PE=3 SV=2	202	49829	34.6	6865	1	0	0	5203011	0
8	2	2::F1NYB1_CHICK	Uncharacterized protein OS=Gallus gallus GN=TUBB4B PE=3 SV=2	202	49829	34.6	6866	1	0	0	5203011	0
8	2	2::F1NYB1_CHICK	Uncharacterized protein OS=Gallus gallus GN=TUBB4B PE=3 SV=2	202	49829	34.6	7174	1	0	0	3598494	1
8	2	2::F1NYB1_CHICK	Uncharacterized protein OS=Gallus gallus GN=TUBB4B PE=3 SV=2	202	49829	34.6	7175	1	0	0	3598495	1
8	2	2::F1NYB1_CHICK	Uncharacterized protein OS=Gallus gallus GN=TUBB4B PE=3 SV=2	202	49829	34.6	7176	1	0	0	5392709	1
8	2	2::F1NYB1_CHICK	Uncharacterized protein OS=Gallus gallus GN=TUBB4B PE=3 SV=2	202	49829	34.6	8492	1	0	0	6153045	0
8	2	2::F1NYB1_CHICK	Uncharacterized protein OS=Gallus gallus GN=TUBB4B PE=3 SV=2	202	49829	34.6	9239	1	0	1	6648297	0
8	2	2::F1NYB1_CHICK	Uncharacterized protein OS=Gallus gallus GN=TUBB4B PE=3 SV=2	202	49829	34.6	10104	1	0	0	7238463	0
8	2	2::F1NYB1_CHICK	Uncharacterized protein OS=Gallus gallus GN=TUBB4B PE=3 SV=2	202	49829	34.6	10105	1	0	0	4829023	0
8	2	2::F1NYB1_CHICK	Uncharacterized protein OS=Gallus gallus GN=TUBB4B PE=3 SV=2	202	49829	34.6	11290	1	0	1	8014159	0
8	2	2::F1NYB1_CHICK	Uncharacterized protein OS=Gallus gallus GN=TUBB4B PE=3 SV=2	202	49829	34.6	11291	1	0	1	8014164	0
8	2	2::F1NYB1_CHICK	Uncharacterized protein OS=Gallus gallus GN=TUBB4B PE=3 SV=2	202	49829	34.6	11292	1	0	1	5346134	0
8	2	2::F1NYB1_CHICK	Uncharacterized protein OS=Gallus gallus GN=TUBB4B PE=3 SV=2	202	49829	34.6	11429	1	0	0	5409521	0
8	2	2::F1NYB1_CHICK	Uncharacterized protein OS=Gallus gallus GN=TUBB4B PE=3 SV=2	202	49829	34.6	11875	1	0	1	5646281	0
8	2	2::F1NYB1_CHICK	Uncharacterized protein OS=Gallus gallus GN=TUBB4B PE=3 SV=2	202	49829	34.6	11876	1	0	1	5646289	0
8	2	2::F1NYB1_CHICK	Uncharacterized protein OS=Gallus gallus GN=TUBB4B PE=3 SV=2	202	49829	34.6	11877	1	0	1	8464399	0
8	2	2::F1NYB1_CHICK	Uncharacterized protein OS=Gallus gallus GN=TUBB4B PE=3 SV=2	202	49829	34.6	11907	1	0	0	5662829	0
8	2	2::F1NYB1_CHICK	Uncharacterized protein OS=Gallus gallus GN=TUBB4B PE=3 SV=2	202	49829	34.6	11908	1	0	0	8489217	0
8	2	2::F1NYB1_CHICK	Uncharacterized protein OS=Gallus gallus GN=TUBB4B PE=3 SV=2	202	49829	34.6	11909	1	0	0	5662838	0
8	2	2::F1NYB1_CHICK	Uncharacterized protein OS=Gallus gallus GN=TUBB4B PE=3 SV=2	202	49829	34.6	12018	2	0	1	8544365	0
8	2	2::F1NYB1_CHICK	Uncharacterized protein OS=Gallus gallus GN=TUBB4B PE=3 SV=2	202	49829	34.6	12020	2	0	1	5699605	0
8	2	2::F1NYB1_CHICK	Uncharacterized protein OS=Gallus gallus GN=TUBB4B PE=3 SV=2	202	49829	34.6	12022	1	0	1	5699606	0
8	2	2::F1NYB1_CHICK	Uncharacterized protein OS=Gallus gallus GN=TUBB4B PE=3 SV=2	202	49829	34.6	13405	1	0	0	6536666	0
8	2	2::F1NYB1_CHICK	Uncharacterized protein OS=Gallus gallus GN=TUBB4B PE=3 SV=2	202	49829	34.6	13406	1	0	0	6536669	0
8	2	2::F1NYB1_CHICK	Uncharacterized protein OS=Gallus gallus GN=TUBB4B PE=3 SV=2	202	49829	34.6	13407	1	0	0	4905020	0
8	2	2::F1NYB1_CHICK	Uncharacterized protein OS=Gallus gallus GN=TUBB4B PE=3 SV=2	202	49829	34.6	13408	1	0	0	4905021	0
8	2	2::F1NYB1_CHICK	Uncharacterized protein OS=Gallus gallus GN=TUBB4B PE=3 SV=2	202	49829	34.6	13409	1	0	0	9799971	0
8	2	2::F1NYB1_CHICK	Uncharacterized protein OS=Gallus gallus GN=TUBB4B PE=3 SV=2	202	49829	34.6	13410	1	0	0	6536673	0
8	2	2::F1NYB1_CHICK	Uncharacterized protein OS=Gallus gallus GN=TUBB4B PE=3 SV=2	202	49829	34.6	13412	1	0	0	9799980	0
8	2	2::F1NYB1_CHICK	Uncharacterized protein OS=Gallus gallus GN=TUBB4B PE=3 SV=2	202	49829	34.6	15743	1	0	1	7798624	0
8	2	2::F1NYB1_CHICK	Uncharacterized protein OS=Gallus gallus GN=TUBB4B PE=3 SV=2	202	49829	34.6	15744	1	0	1	7798625	0	emPAI	0.41
8		2::F1NMU4_CHICK	Uncharacterized protein (Fragment) OS=Gallus gallus GN=TUBB3 PE=3 SV=2	242	44397	19.6	4330	1	0	0	4046782	0
8		2::F1NMU4_CHICK	Uncharacterized protein (Fragment) OS=Gallus gallus GN=TUBB3 PE=3 SV=2	242	44397	19.6	8492	1	0	0	6153045	0
8		2::F1NMU4_CHICK	Uncharacterized protein (Fragment) OS=Gallus gallus GN=TUBB3 PE=3 SV=2	242	44397	19.6	11399	1	0	1	8084229	0
8		2::F1NMU4_CHICK	Uncharacterized protein (Fragment) OS=Gallus gallus GN=TUBB3 PE=3 SV=2	242	44397	19.6	11400	1	0	1	5392844	0
8		2::F1NMU4_CHICK	Uncharacterized protein (Fragment) OS=Gallus gallus GN=TUBB3 PE=3 SV=2	242	44397	19.6	11401	1	0	1	8084232	0
8		2::F1NMU4_CHICK	Uncharacterized protein (Fragment) OS=Gallus gallus GN=TUBB3 PE=3 SV=2	242	44397	19.6	11402	1	0	1	5392852	0
8		2::F1NMU4_CHICK	Uncharacterized protein (Fragment) OS=Gallus gallus GN=TUBB3 PE=3 SV=2	242	44397	19.6	11403	1	0	1	8084248	0
8		2::F1NMU4_CHICK	Uncharacterized protein (Fragment) OS=Gallus gallus GN=TUBB3 PE=3 SV=2	242	44397	19.6	11875	1	0	1	5646281	0
8		2::F1NMU4_CHICK	Uncharacterized protein (Fragment) OS=Gallus gallus GN=TUBB3 PE=3 SV=2	242	44397	19.6	11876	1	0	1	5646289	0
8		2::F1NMU4_CHICK	Uncharacterized protein (Fragment) OS=Gallus gallus GN=TUBB3 PE=3 SV=2	242	44397	19.6	11877	1	0	1	8464399	0
8		2::F1NMU4_CHICK	Uncharacterized protein (Fragment) OS=Gallus gallus GN=TUBB3 PE=3 SV=2	242	44397	19.6	11907	1	0	0	5662829	0
8		2::F1NMU4_CHICK	Uncharacterized protein (Fragment) OS=Gallus gallus GN=TUBB3 PE=3 SV=2	242	44397	19.6	11908	1	0	0	8489217	0
8		2::F1NMU4_CHICK	Uncharacterized protein (Fragment) OS=Gallus gallus GN=TUBB3 PE=3 SV=2	242	44397	19.6	11909	1	0	0	5662838	0
8		2::F1NMU4_CHICK	Uncharacterized protein (Fragment) OS=Gallus gallus GN=TUBB3 PE=3 SV=2	242	44397	19.6	12018	2	0	1	8544365	0
8		2::F1NMU4_CHICK	Uncharacterized protein (Fragment) OS=Gallus gallus GN=TUBB3 PE=3 SV=2	242	44397	19.6	12020	2	0	1	5699605	0
8		2::F1NMU4_CHICK	Uncharacterized protein (Fragment) OS=Gallus gallus GN=TUBB3 PE=3 SV=2	242	44397	19.6	12022	1	0	1	5699606	0
8		2::F1NMU4_CHICK	Uncharacterized protein (Fragment) OS=Gallus gallus GN=TUBB3 PE=3 SV=2	242	44397	19.6	13405	1	0	0	6536666	0
8		2::F1NMU4_CHICK	Uncharacterized protein (Fragment) OS=Gallus gallus GN=TUBB3 PE=3 SV=2	242	44397	19.6	13406	1	0	0	6536669	0
8		2::F1NMU4_CHICK	Uncharacterized protein (Fragment) OS=Gallus gallus GN=TUBB3 PE=3 SV=2	242	44397	19.6	13407	1	0	0	4905020	0
8		2::F1NMU4_CHICK	Uncharacterized protein (Fragment) OS=Gallus gallus GN=TUBB3 PE=3 SV=2	242	44397	19.6	13408	1	0	0	4905021	0
8		2::F1NMU4_CHICK	Uncharacterized protein (Fragment) OS=Gallus gallus GN=TUBB3 PE=3 SV=2	242	44397	19.6	13409	1	0	0	9799971	0
8		2::F1NMU4_CHICK	Uncharacterized protein (Fragment) OS=Gallus gallus GN=TUBB3 PE=3 SV=2	242	44397	19.6	13410	1	0	0	6536673	0
8		2::F1NMU4_CHICK	Uncharacterized protein (Fragment) OS=Gallus gallus GN=TUBB3 PE=3 SV=2	242	44397	19.6	13412	1	0	0	9799980	0
9	1	2::R4GKA6_CHICK	Collagen alpha-2(VI) chain OS=Gallus gallus GN=COL6A2 PE=4 SV=1	261	102432	23.8	2549	1	1	1	3156826	0
9	1	2::R4GKA6_CHICK	Collagen alpha-2(VI) chain OS=Gallus gallus GN=COL6A2 PE=4 SV=1	261	102432	23.8	2672	1	1	1	3241538	0
9	1	2::R4GKA6_CHICK	Collagen alpha-2(VI) chain OS=Gallus gallus GN=COL6A2 PE=4 SV=1	261	102432	23.8	5396	1	1	1	4482491	0
9	1	2::R4GKA6_CHICK	Collagen alpha-2(VI) chain OS=Gallus gallus GN=COL6A2 PE=4 SV=1	261	102432	23.8	6823	1	1	1	5172949	0
9	1	2::R4GKA6_CHICK	Collagen alpha-2(VI) chain OS=Gallus gallus GN=COL6A2 PE=4 SV=1	261	102432	23.8	7772	1	1	1	5747858	0
9	1	2::R4GKA6_CHICK	Collagen alpha-2(VI) chain OS=Gallus gallus GN=COL6A2 PE=4 SV=1	261	102432	23.8	7773	1	1	1	5747860	0
9	1	2::R4GKA6_CHICK	Collagen alpha-2(VI) chain OS=Gallus gallus GN=COL6A2 PE=4 SV=1	261	102432	23.8	7786	1	1	1	5753184	0
9	1	2::R4GKA6_CHICK	Collagen alpha-2(VI) chain OS=Gallus gallus GN=COL6A2 PE=4 SV=1	261	102432	23.8	7787	1	1	1	5753200	0
9	1	2::R4GKA6_CHICK	Collagen alpha-2(VI) chain OS=Gallus gallus GN=COL6A2 PE=4 SV=1	261	102432	23.8	8825	1	1	1	6383581	0
9	1	2::R4GKA6_CHICK	Collagen alpha-2(VI) chain OS=Gallus gallus GN=COL6A2 PE=4 SV=1	261	102432	23.8	8961	1	1	1	4332240	0
9	1	2::R4GKA6_CHICK	Collagen alpha-2(VI) chain OS=Gallus gallus GN=COL6A2 PE=4 SV=1	261	102432	23.8	9970	1	1	1	7133523	0
9	1	2::R4GKA6_CHICK	Collagen alpha-2(VI) chain OS=Gallus gallus GN=COL6A2 PE=4 SV=1	261	102432	23.8	9971	1	1	1	4759048	0
9	1	2::R4GKA6_CHICK	Collagen alpha-2(VI) chain OS=Gallus gallus GN=COL6A2 PE=4 SV=1	261	102432	23.8	9972	1	1	1	4759048	0
9	1	2::R4GKA6_CHICK	Collagen alpha-2(VI) chain OS=Gallus gallus GN=COL6A2 PE=4 SV=1	261	102432	23.8	10671	1	1	1	7633942	0
9	1	2::R4GKA6_CHICK	Collagen alpha-2(VI) chain OS=Gallus gallus GN=COL6A2 PE=4 SV=1	261	102432	23.8	10673	1	1	1	5092657	0
9	1	2::R4GKA6_CHICK	Collagen alpha-2(VI) chain OS=Gallus gallus GN=COL6A2 PE=4 SV=1	261	102432	23.8	10674	1	1	1	7633950	0
9	1	2::R4GKA6_CHICK	Collagen alpha-2(VI) chain OS=Gallus gallus GN=COL6A2 PE=4 SV=1	261	102432	23.8	11176	1	1	1	7958601	0
9	1	2::R4GKA6_CHICK	Collagen alpha-2(VI) chain OS=Gallus gallus GN=COL6A2 PE=4 SV=1	261	102432	23.8	12446	1	1	1	5886394	0
9	1	2::R4GKA6_CHICK	Collagen alpha-2(VI) chain OS=Gallus gallus GN=COL6A2 PE=4 SV=1	261	102432	23.8	12584	1	1	1	5986417	0
9	1	2::R4GKA6_CHICK	Collagen alpha-2(VI) chain OS=Gallus gallus GN=COL6A2 PE=4 SV=1	261	102432	23.8	12585	1	1	1	8974594	0
9	1	2::R4GKA6_CHICK	Collagen alpha-2(VI) chain OS=Gallus gallus GN=COL6A2 PE=4 SV=1	261	102432	23.8	12619	1	1	1	8999664	0
9	1	2::R4GKA6_CHICK	Collagen alpha-2(VI) chain OS=Gallus gallus GN=COL6A2 PE=4 SV=1	261	102432	23.8	12620	1	1	1	6003136	0
9	1	2::R4GKA6_CHICK	Collagen alpha-2(VI) chain OS=Gallus gallus GN=COL6A2 PE=4 SV=1	261	102432	23.8	12621	1	1	1	8999668	0
9	1	2::R4GKA6_CHICK	Collagen alpha-2(VI) chain OS=Gallus gallus GN=COL6A2 PE=4 SV=1	261	102432	23.8	12624	1	1	1	6003151	0
9	1	2::R4GKA6_CHICK	Collagen alpha-2(VI) chain OS=Gallus gallus GN=COL6A2 PE=4 SV=1	261	102432	23.8	12883	1	1	1	9244274	1
9	1	2::R4GKA6_CHICK	Collagen alpha-2(VI) chain OS=Gallus gallus GN=COL6A2 PE=4 SV=1	261	102432	23.8	12884	1	1	1	6166219	1
9	1	2::R4GKA6_CHICK	Collagen alpha-2(VI) chain OS=Gallus gallus GN=COL6A2 PE=4 SV=1	261	102432	23.8	12885	1	1	1	6166220	1
9	1	2::R4GKA6_CHICK	Collagen alpha-2(VI) chain OS=Gallus gallus GN=COL6A2 PE=4 SV=1	261	102432	23.8	12893	1	1	1	4627530	0
9	1	2::R4GKA6_CHICK	Collagen alpha-2(VI) chain OS=Gallus gallus GN=COL6A2 PE=4 SV=1	261	102432	23.8	12894	1	1	1	6166683	0
9	1	2::R4GKA6_CHICK	Collagen alpha-2(VI) chain OS=Gallus gallus GN=COL6A2 PE=4 SV=1	261	102432	23.8	12895	1	1	1	6166691	0
9	1	2::R4GKA6_CHICK	Collagen alpha-2(VI) chain OS=Gallus gallus GN=COL6A2 PE=4 SV=1	261	102432	23.8	12896	1	1	1	4627537	0
9	1	2::R4GKA6_CHICK	Collagen alpha-2(VI) chain OS=Gallus gallus GN=COL6A2 PE=4 SV=1	261	102432	23.8	14493	1	1	1	11230789	0
9	1	2::R4GKA6_CHICK	Collagen alpha-2(VI) chain OS=Gallus gallus GN=COL6A2 PE=4 SV=1	261	102432	23.8	14494	1	1	1	7490551	0
9	1	2::R4GKA6_CHICK	Collagen alpha-2(VI) chain OS=Gallus gallus GN=COL6A2 PE=4 SV=1	261	102432	23.8	14495	1	1	1	11230799	0
9	1	2::R4GKA6_CHICK	Collagen alpha-2(VI) chain OS=Gallus gallus GN=COL6A2 PE=4 SV=1	261	102432	23.8	14808	1	1	1	7917533	1
9	1	2::R4GKA6_CHICK	Collagen alpha-2(VI) chain OS=Gallus gallus GN=COL6A2 PE=4 SV=1	261	102432	23.8	14809	1	1	1	7917539	1
9	1	2::R4GKA6_CHICK	Collagen alpha-2(VI) chain OS=Gallus gallus GN=COL6A2 PE=4 SV=1	261	102432	23.8	15587	1	1	1	9715086	0
9	1	2::R4GKA6_CHICK	Collagen alpha-2(VI) chain OS=Gallus gallus GN=COL6A2 PE=4 SV=1	261	102432	23.8	15588	1	1	1	7288838	0	emPAI	0.40
10	1	2::F1NW23_CHICK	Uncharacterized protein (Fragment) OS=Gallus gallus GN=CLTC PE=4 SV=1	240	189912	22.7	2348	4	0	1	3096584	0
10	1	2::F1NW23_CHICK	Uncharacterized protein (Fragment) OS=Gallus gallus GN=CLTC PE=4 SV=1	240	189912	22.7	2900	1	1	1	3356980	0
10	1	2::F1NW23_CHICK	Uncharacterized protein (Fragment) OS=Gallus gallus GN=CLTC PE=4 SV=1	240	189912	22.7	4494	1	1	1	4137801	0
10	1	2::F1NW23_CHICK	Uncharacterized protein (Fragment) OS=Gallus gallus GN=CLTC PE=4 SV=1	240	189912	22.7	5790	1	1	1	4627373	0
10	1	2::F1NW23_CHICK	Uncharacterized protein (Fragment) OS=Gallus gallus GN=CLTC PE=4 SV=1	240	189912	22.7	6993	1	1	1	5282935	0
10	1	2::F1NW23_CHICK	Uncharacterized protein (Fragment) OS=Gallus gallus GN=CLTC PE=4 SV=1	240	189912	22.7	7135	1	1	1	5363151	0
10	1	2::F1NW23_CHICK	Uncharacterized protein (Fragment) OS=Gallus gallus GN=CLTC PE=4 SV=1	240	189912	22.7	7136	1	1	1	5363152	0
10	1	2::F1NW23_CHICK	Uncharacterized protein (Fragment) OS=Gallus gallus GN=CLTC PE=4 SV=1	240	189912	22.7	7347	3	1	1	5497974	0
10	1	2::F1NW23_CHICK	Uncharacterized protein (Fragment) OS=Gallus gallus GN=CLTC PE=4 SV=1	240	189912	22.7	8547	1	1	1	6188372	0
10	1	2::F1NW23_CHICK	Uncharacterized protein (Fragment) OS=Gallus gallus GN=CLTC PE=4 SV=1	240	189912	22.7	9290	1	1	1	6678219	0
10	1	2::F1NW23_CHICK	Uncharacterized protein (Fragment) OS=Gallus gallus GN=CLTC PE=4 SV=1	240	189912	22.7	9434	1	1	1	6774288	0
10	1	2::F1NW23_CHICK	Uncharacterized protein (Fragment) OS=Gallus gallus GN=CLTC PE=4 SV=1	240	189912	22.7	9435	1	1	1	6774297	0
10	1	2::F1NW23_CHICK	Uncharacterized protein (Fragment) OS=Gallus gallus GN=CLTC PE=4 SV=1	240	189912	22.7	9888	1	1	1	4725823	0
10	1	2::F1NW23_CHICK	Uncharacterized protein (Fragment) OS=Gallus gallus GN=CLTC PE=4 SV=1	240	189912	22.7	10256	1	1	1	4889186	0
10	1	2::F1NW23_CHICK	Uncharacterized protein (Fragment) OS=Gallus gallus GN=CLTC PE=4 SV=1	240	189912	22.7	10861	1	1	1	5179249	0
10	1	2::F1NW23_CHICK	Uncharacterized protein (Fragment) OS=Gallus gallus GN=CLTC PE=4 SV=1	240	189912	22.7	10862	1	1	1	7763843	0
10	1	2::F1NW23_CHICK	Uncharacterized protein (Fragment) OS=Gallus gallus GN=CLTC PE=4 SV=1	240	189912	22.7	13339	1	1	1	6483117	0
10	1	2::F1NW23_CHICK	Uncharacterized protein (Fragment) OS=Gallus gallus GN=CLTC PE=4 SV=1	240	189912	22.7	13340	1	1	1	9719642	0
10	1	2::F1NW23_CHICK	Uncharacterized protein (Fragment) OS=Gallus gallus GN=CLTC PE=4 SV=1	240	189912	22.7	13354	1	1	1	6490247	0
10	1	2::F1NW23_CHICK	Uncharacterized protein (Fragment) OS=Gallus gallus GN=CLTC PE=4 SV=1	240	189912	22.7	13355	1	1	1	6490251	0
10	1	2::F1NW23_CHICK	Uncharacterized protein (Fragment) OS=Gallus gallus GN=CLTC PE=4 SV=1	240	189912	22.7	13359	1	1	1	9740148	0
10	1	2::F1NW23_CHICK	Uncharacterized protein (Fragment) OS=Gallus gallus GN=CLTC PE=4 SV=1	240	189912	22.7	13453	1	1	1	6576824	0
10	1	2::F1NW23_CHICK	Uncharacterized protein (Fragment) OS=Gallus gallus GN=CLTC PE=4 SV=1	240	189912	22.7	13454	1	1	1	6576831	0
10	1	2::F1NW23_CHICK	Uncharacterized protein (Fragment) OS=Gallus gallus GN=CLTC PE=4 SV=1	240	189912	22.7	13639	1	1	1	6730200	1
10	1	2::F1NW23_CHICK	Uncharacterized protein (Fragment) OS=Gallus gallus GN=CLTC PE=4 SV=1	240	189912	22.7	13640	1	1	1	6730205	1
10	1	2::F1NW23_CHICK	Uncharacterized protein (Fragment) OS=Gallus gallus GN=CLTC PE=4 SV=1	240	189912	22.7	13956	1	1	1	7026878	0
10	1	2::F1NW23_CHICK	Uncharacterized protein (Fragment) OS=Gallus gallus GN=CLTC PE=4 SV=1	240	189912	22.7	14314	1	1	1	7323782	0
10	1	2::F1NW23_CHICK	Uncharacterized protein (Fragment) OS=Gallus gallus GN=CLTC PE=4 SV=1	240	189912	22.7	14316	1	1	1	7337099	0
10	1	2::F1NW23_CHICK	Uncharacterized protein (Fragment) OS=Gallus gallus GN=CLTC PE=4 SV=1	240	189912	22.7	14469	1	1	1	7473977	0
10	1	2::F1NW23_CHICK	Uncharacterized protein (Fragment) OS=Gallus gallus GN=CLTC PE=4 SV=1	240	189912	22.7	14792	1	1	1	7897342	0
10	1	2::F1NW23_CHICK	Uncharacterized protein (Fragment) OS=Gallus gallus GN=CLTC PE=4 SV=1	240	189912	22.7	14793	1	1	1	7897347	0
10	1	2::F1NW23_CHICK	Uncharacterized protein (Fragment) OS=Gallus gallus GN=CLTC PE=4 SV=1	240	189912	22.7	14833	1	1	1	7954253	0
10	1	2::F1NW23_CHICK	Uncharacterized protein (Fragment) OS=Gallus gallus GN=CLTC PE=4 SV=1	240	189912	22.7	14834	1	1	1	5968210	0
10	1	2::F1NW23_CHICK	Uncharacterized protein (Fragment) OS=Gallus gallus GN=CLTC PE=4 SV=1	240	189912	22.7	14835	1	1	1	7954264	0
10	1	2::F1NW23_CHICK	Uncharacterized protein (Fragment) OS=Gallus gallus GN=CLTC PE=4 SV=1	240	189912	22.7	14985	1	1	1	8220812	0
10	1	2::F1NW23_CHICK	Uncharacterized protein (Fragment) OS=Gallus gallus GN=CLTC PE=4 SV=1	240	189912	22.7	15550	1	1	1	9611784	0
10	1	2::F1NW23_CHICK	Uncharacterized protein (Fragment) OS=Gallus gallus GN=CLTC PE=4 SV=1	240	189912	22.7	15551	1	1	1	9611797	0
10	1	2::F1NW23_CHICK	Uncharacterized protein (Fragment) OS=Gallus gallus GN=CLTC PE=4 SV=1	240	189912	22.7	15552	1	1	1	7211367	0	emPAI	0.18
10		2::Q8UUR1_CHICK	Clathrin heavy-chain (Fragment) OS=Gallus gallus GN=CHC PE=2 SV=1	218	191478	18.8	2348	4	0	1	3096584	0
10		2::Q8UUR1_CHICK	Clathrin heavy-chain (Fragment) OS=Gallus gallus GN=CHC PE=2 SV=1	218	191478	18.8	2900	1	0	1	3356980	0
10		2::Q8UUR1_CHICK	Clathrin heavy-chain (Fragment) OS=Gallus gallus GN=CHC PE=2 SV=1	218	191478	18.8	4494	1	0	1	4137801	0
10		2::Q8UUR1_CHICK	Clathrin heavy-chain (Fragment) OS=Gallus gallus GN=CHC PE=2 SV=1	218	191478	18.8	6993	1	0	1	5282935	0
10		2::Q8UUR1_CHICK	Clathrin heavy-chain (Fragment) OS=Gallus gallus GN=CHC PE=2 SV=1	218	191478	18.8	7135	1	0	1	5363151	0
10		2::Q8UUR1_CHICK	Clathrin heavy-chain (Fragment) OS=Gallus gallus GN=CHC PE=2 SV=1	218	191478	18.8	7136	1	0	1	5363152	0
10		2::Q8UUR1_CHICK	Clathrin heavy-chain (Fragment) OS=Gallus gallus GN=CHC PE=2 SV=1	218	191478	18.8	7347	3	0	1	5497974	0
10		2::Q8UUR1_CHICK	Clathrin heavy-chain (Fragment) OS=Gallus gallus GN=CHC PE=2 SV=1	218	191478	18.8	8547	1	0	1	6188372	0
10		2::Q8UUR1_CHICK	Clathrin heavy-chain (Fragment) OS=Gallus gallus GN=CHC PE=2 SV=1	218	191478	18.8	9888	1	0	1	4725823	0
10		2::Q8UUR1_CHICK	Clathrin heavy-chain (Fragment) OS=Gallus gallus GN=CHC PE=2 SV=1	218	191478	18.8	10861	1	0	1	5179249	0
10		2::Q8UUR1_CHICK	Clathrin heavy-chain (Fragment) OS=Gallus gallus GN=CHC PE=2 SV=1	218	191478	18.8	10862	1	0	1	7763843	0
10		2::Q8UUR1_CHICK	Clathrin heavy-chain (Fragment) OS=Gallus gallus GN=CHC PE=2 SV=1	218	191478	18.8	13339	1	0	1	6483117	0
10		2::Q8UUR1_CHICK	Clathrin heavy-chain (Fragment) OS=Gallus gallus GN=CHC PE=2 SV=1	218	191478	18.8	13340	1	0	1	9719642	0
10		2::Q8UUR1_CHICK	Clathrin heavy-chain (Fragment) OS=Gallus gallus GN=CHC PE=2 SV=1	218	191478	18.8	13354	1	0	1	6490247	0
10		2::Q8UUR1_CHICK	Clathrin heavy-chain (Fragment) OS=Gallus gallus GN=CHC PE=2 SV=1	218	191478	18.8	13355	1	0	1	6490251	0
10		2::Q8UUR1_CHICK	Clathrin heavy-chain (Fragment) OS=Gallus gallus GN=CHC PE=2 SV=1	218	191478	18.8	13359	1	0	1	9740148	0
10		2::Q8UUR1_CHICK	Clathrin heavy-chain (Fragment) OS=Gallus gallus GN=CHC PE=2 SV=1	218	191478	18.8	13453	1	0	1	6576824	0
10		2::Q8UUR1_CHICK	Clathrin heavy-chain (Fragment) OS=Gallus gallus GN=CHC PE=2 SV=1	218	191478	18.8	13454	1	0	1	6576831	0
10		2::Q8UUR1_CHICK	Clathrin heavy-chain (Fragment) OS=Gallus gallus GN=CHC PE=2 SV=1	218	191478	18.8	13639	1	0	1	6730200	1
10		2::Q8UUR1_CHICK	Clathrin heavy-chain (Fragment) OS=Gallus gallus GN=CHC PE=2 SV=1	218	191478	18.8	13640	1	0	1	6730205	1
10		2::Q8UUR1_CHICK	Clathrin heavy-chain (Fragment) OS=Gallus gallus GN=CHC PE=2 SV=1	218	191478	18.8	13956	1	0	1	7026878	0
10		2::Q8UUR1_CHICK	Clathrin heavy-chain (Fragment) OS=Gallus gallus GN=CHC PE=2 SV=1	218	191478	18.8	14314	1	0	1	7323782	0
10		2::Q8UUR1_CHICK	Clathrin heavy-chain (Fragment) OS=Gallus gallus GN=CHC PE=2 SV=1	218	191478	18.8	14316	1	0	1	7337099	0
10		2::Q8UUR1_CHICK	Clathrin heavy-chain (Fragment) OS=Gallus gallus GN=CHC PE=2 SV=1	218	191478	18.8	14792	1	0	1	7897342	0
10		2::Q8UUR1_CHICK	Clathrin heavy-chain (Fragment) OS=Gallus gallus GN=CHC PE=2 SV=1	218	191478	18.8	14793	1	0	1	7897347	0
10		2::Q8UUR1_CHICK	Clathrin heavy-chain (Fragment) OS=Gallus gallus GN=CHC PE=2 SV=1	218	191478	18.8	14833	1	0	1	7954253	0
10		2::Q8UUR1_CHICK	Clathrin heavy-chain (Fragment) OS=Gallus gallus GN=CHC PE=2 SV=1	218	191478	18.8	14834	1	0	1	5968210	0
10		2::Q8UUR1_CHICK	Clathrin heavy-chain (Fragment) OS=Gallus gallus GN=CHC PE=2 SV=1	218	191478	18.8	14835	1	0	1	7954264	0
10		2::Q8UUR1_CHICK	Clathrin heavy-chain (Fragment) OS=Gallus gallus GN=CHC PE=2 SV=1	218	191478	18.8	14985	1	0	1	8220812	0
10		2::Q8UUR1_CHICK	Clathrin heavy-chain (Fragment) OS=Gallus gallus GN=CHC PE=2 SV=1	218	191478	18.8	15550	1	0	1	9611784	0
10		2::Q8UUR1_CHICK	Clathrin heavy-chain (Fragment) OS=Gallus gallus GN=CHC PE=2 SV=1	218	191478	18.8	15551	1	0	1	9611797	0
10		2::Q8UUR1_CHICK	Clathrin heavy-chain (Fragment) OS=Gallus gallus GN=CHC PE=2 SV=1	218	191478	18.8	15552	1	0	1	7211367	0
10		2::Q8UUQ9_CHICK	Clathrin heavy-chain (Fragment) OS=Gallus gallus GN=chc PE=4 SV=1	94	56623	11.4	2900	1	0	1	3356980	0
10		2::Q8UUQ9_CHICK	Clathrin heavy-chain (Fragment) OS=Gallus gallus GN=chc PE=4 SV=1	94	56623	11.4	7135	1	0	1	5363151	0
10		2::Q8UUQ9_CHICK	Clathrin heavy-chain (Fragment) OS=Gallus gallus GN=chc PE=4 SV=1	94	56623	11.4	7136	1	0	1	5363152	0
10		2::Q8UUQ9_CHICK	Clathrin heavy-chain (Fragment) OS=Gallus gallus GN=chc PE=4 SV=1	94	56623	11.4	14316	1	0	1	7337099	0
10		2::Q8UUQ9_CHICK	Clathrin heavy-chain (Fragment) OS=Gallus gallus GN=chc PE=4 SV=1	94	56623	11.4	14833	1	0	1	7954253	0
10		2::Q8UUQ9_CHICK	Clathrin heavy-chain (Fragment) OS=Gallus gallus GN=chc PE=4 SV=1	94	56623	11.4	14834	1	0	1	5968210	0
10		2::Q8UUQ9_CHICK	Clathrin heavy-chain (Fragment) OS=Gallus gallus GN=chc PE=4 SV=1	94	56623	11.4	14835	1	0	1	7954264	0
10		2::Q8UUQ6_CHICK	Clathrin heavy-chain (Fragment) OS=Gallus gallus GN=chc PE=4 SV=1	89	42960	30.1	9888	1	0	1	4725823	0
10		2::Q8UUQ6_CHICK	Clathrin heavy-chain (Fragment) OS=Gallus gallus GN=chc PE=4 SV=1	89	42960	30.1	13359	1	0	1	9740148	0
10		2::Q8UUQ6_CHICK	Clathrin heavy-chain (Fragment) OS=Gallus gallus GN=chc PE=4 SV=1	89	42960	30.1	13453	1	0	1	6576824	0
10		2::Q8UUQ6_CHICK	Clathrin heavy-chain (Fragment) OS=Gallus gallus GN=chc PE=4 SV=1	89	42960	30.1	13454	1	0	1	6576831	0
10		2::Q8UUQ6_CHICK	Clathrin heavy-chain (Fragment) OS=Gallus gallus GN=chc PE=4 SV=1	89	42960	30.1	13639	1	0	1	6730200	1
10		2::Q8UUQ6_CHICK	Clathrin heavy-chain (Fragment) OS=Gallus gallus GN=chc PE=4 SV=1	89	42960	30.1	13640	1	0	1	6730205	1
10		2::Q8UUQ6_CHICK	Clathrin heavy-chain (Fragment) OS=Gallus gallus GN=chc PE=4 SV=1	89	42960	30.1	14985	1	0	1	8220812	0
10		2::Q8UUQ6_CHICK	Clathrin heavy-chain (Fragment) OS=Gallus gallus GN=chc PE=4 SV=1	89	42960	30.1	15550	1	0	1	9611784	0
10		2::Q8UUQ6_CHICK	Clathrin heavy-chain (Fragment) OS=Gallus gallus GN=chc PE=4 SV=1	89	42960	30.1	15551	1	0	1	9611797	0
10		2::Q8UUQ6_CHICK	Clathrin heavy-chain (Fragment) OS=Gallus gallus GN=chc PE=4 SV=1	89	42960	30.1	15552	1	0	1	7211367	0
10		2::F1NYC4_CHICK	Uncharacterized protein (Fragment) OS=Gallus gallus GN=CLTCL1 PE=4 SV=1	86	191815	7.1	5790	1	0	1	4627373	0
10		2::F1NYC4_CHICK	Uncharacterized protein (Fragment) OS=Gallus gallus GN=CLTCL1 PE=4 SV=1	86	191815	7.1	6993	1	0	1	5282935	0
10		2::F1NYC4_CHICK	Uncharacterized protein (Fragment) OS=Gallus gallus GN=CLTCL1 PE=4 SV=1	86	191815	7.1	7347	3	0	1	5497974	0
10		2::F1NYC4_CHICK	Uncharacterized protein (Fragment) OS=Gallus gallus GN=CLTCL1 PE=4 SV=1	86	191815	7.1	8547	1	0	1	6188372	0
10		2::F1NYC4_CHICK	Uncharacterized protein (Fragment) OS=Gallus gallus GN=CLTCL1 PE=4 SV=1	86	191815	7.1	9290	1	0	1	6678219	0
10		2::F1NYC4_CHICK	Uncharacterized protein (Fragment) OS=Gallus gallus GN=CLTCL1 PE=4 SV=1	86	191815	7.1	9434	1	0	1	6774288	0
10		2::F1NYC4_CHICK	Uncharacterized protein (Fragment) OS=Gallus gallus GN=CLTCL1 PE=4 SV=1	86	191815	7.1	9435	1	0	1	6774297	0
10		2::F1NYC4_CHICK	Uncharacterized protein (Fragment) OS=Gallus gallus GN=CLTCL1 PE=4 SV=1	86	191815	7.1	9888	1	0	1	4725823	0
10		2::F1NYC4_CHICK	Uncharacterized protein (Fragment) OS=Gallus gallus GN=CLTCL1 PE=4 SV=1	86	191815	7.1	10861	1	0	1	5179249	0
10		2::F1NYC4_CHICK	Uncharacterized protein (Fragment) OS=Gallus gallus GN=CLTCL1 PE=4 SV=1	86	191815	7.1	10862	1	0	1	7763843	0
10		2::F1NYC4_CHICK	Uncharacterized protein (Fragment) OS=Gallus gallus GN=CLTCL1 PE=4 SV=1	86	191815	7.1	13359	1	0	1	9740148	0
10		2::F1NYC4_CHICK	Uncharacterized protein (Fragment) OS=Gallus gallus GN=CLTCL1 PE=4 SV=1	86	191815	7.1	14469	1	0	1	7473977	0
11	1	1::sp|K2C1_HUMAN|	sp|K2C1_HUMAN|	231	65847	42.3	2241	1	1	1	3016794	0
11	1	1::sp|K2C1_HUMAN|	sp|K2C1_HUMAN|	231	65847	42.3	2923	1	1	1	3371981	0
11	1	1::sp|K2C1_HUMAN|	sp|K2C1_HUMAN|	231	65847	42.3	2924	1	1	1	3371983	0
11	1	1::sp|K2C1_HUMAN|	sp|K2C1_HUMAN|	231	65847	42.3	3314	1	1	1	3526956	0
11	1	1::sp|K2C1_HUMAN|	sp|K2C1_HUMAN|	231	65847	42.3	4297	1	1	1	4027090	0
11	1	1::sp|K2C1_HUMAN|	sp|K2C1_HUMAN|	231	65847	42.3	4298	1	1	1	4027090	0
11	1	1::sp|K2C1_HUMAN|	sp|K2C1_HUMAN|	231	65847	42.3	4551	1	1	1	4167486	0
11	1	1::sp|K2C1_HUMAN|	sp|K2C1_HUMAN|	231	65847	42.3	4552	1	1	1	4167491	0
11	1	1::sp|K2C1_HUMAN|	sp|K2C1_HUMAN|	231	65847	42.3	5177	1	1	1	4377540	0
11	1	1::sp|K2C1_HUMAN|	sp|K2C1_HUMAN|	231	65847	42.3	5178	1	1	1	4377543	0
11	1	1::sp|K2C1_HUMAN|	sp|K2C1_HUMAN|	231	65847	42.3	5642	1	1	0	4557115	0
11	1	1::sp|K2C1_HUMAN|	sp|K2C1_HUMAN|	231	65847	42.3	6325	1	1	0	4872700	0
11	1	1::sp|K2C1_HUMAN|	sp|K2C1_HUMAN|	231	65847	42.3	6327	1	1	0	4872705	0
11	1	1::sp|K2C1_HUMAN|	sp|K2C1_HUMAN|	231	65847	42.3	6541	1	1	1	5002271	0
11	1	1::sp|K2C1_HUMAN|	sp|K2C1_HUMAN|	231	65847	42.3	6818	1	1	1	5172625	0
11	1	1::sp|K2C1_HUMAN|	sp|K2C1_HUMAN|	231	65847	42.3	6819	1	1	1	5172628	0
11	1	1::sp|K2C1_HUMAN|	sp|K2C1_HUMAN|	231	65847	42.3	6820	1	1	1	5172629	0
11	1	1::sp|K2C1_HUMAN|	sp|K2C1_HUMAN|	231	65847	42.3	7080	1	1	0	3561772	1
11	1	1::sp|K2C1_HUMAN|	sp|K2C1_HUMAN|	231	65847	42.3	7081	1	1	0	5337625	1
11	1	1::sp|K2C1_HUMAN|	sp|K2C1_HUMAN|	231	65847	42.3	7291	1	1	1	5467566	0
11	1	1::sp|K2C1_HUMAN|	sp|K2C1_HUMAN|	231	65847	42.3	7581	1	1	1	5632762	0
11	1	1::sp|K2C1_HUMAN|	sp|K2C1_HUMAN|	231	65847	42.3	7714	1	1	1	5712646	0
11	1	1::sp|K2C1_HUMAN|	sp|K2C1_HUMAN|	231	65847	42.3	8083	1	1	1	3938729	0
11	1	1::sp|K2C1_HUMAN|	sp|K2C1_HUMAN|	231	65847	42.3	8765	1	1	1	6333237	0
11	1	1::sp|K2C1_HUMAN|	sp|K2C1_HUMAN|	231	65847	42.3	8766	1	1	1	6333243	0
11	1	1::sp|K2C1_HUMAN|	sp|K2C1_HUMAN|	231	65847	42.3	8836	1	0	1	6393592	0
11	1	1::sp|K2C1_HUMAN|	sp|K2C1_HUMAN|	231	65847	42.3	8969	1	1	1	6507699	0
11	1	1::sp|K2C1_HUMAN|	sp|K2C1_HUMAN|	231	65847	42.3	9002	1	1	1	6518624	0
11	1	1::sp|K2C1_HUMAN|	sp|K2C1_HUMAN|	231	65847	42.3	9003	1	1	1	6518625	0
11	1	1::sp|K2C1_HUMAN|	sp|K2C1_HUMAN|	231	65847	42.3	9004	2	1	1	4349110	0
11	1	1::sp|K2C1_HUMAN|	sp|K2C1_HUMAN|	231	65847	42.3	9005	1	1	1	4349110	0
11	1	1::sp|K2C1_HUMAN|	sp|K2C1_HUMAN|	231	65847	42.3	9006	1	1	1	6518634	0
11	1	1::sp|K2C1_HUMAN|	sp|K2C1_HUMAN|	231	65847	42.3	9007	1	1	1	6518635	0
11	1	1::sp|K2C1_HUMAN|	sp|K2C1_HUMAN|	231	65847	42.3	9464	1	1	1	6793531	0
11	1	1::sp|K2C1_HUMAN|	sp|K2C1_HUMAN|	231	65847	42.3	9465	1	1	1	6793531	0
11	1	1::sp|K2C1_HUMAN|	sp|K2C1_HUMAN|	231	65847	42.3	9466	1	1	1	4532383	0
11	1	1::sp|K2C1_HUMAN|	sp|K2C1_HUMAN|	231	65847	42.3	9648	1	1	1	6923502	0
11	1	1::sp|K2C1_HUMAN|	sp|K2C1_HUMAN|	231	65847	42.3	9649	1	1	1	6923508	0
11	1	1::sp|K2C1_HUMAN|	sp|K2C1_HUMAN|	231	65847	42.3	10307	1	1	1	7383801	0
11	1	1::sp|K2C1_HUMAN|	sp|K2C1_HUMAN|	231	65847	42.3	10308	1	1	1	7383802	0
11	1	1::sp|K2C1_HUMAN|	sp|K2C1_HUMAN|	231	65847	42.3	10309	1	1	1	4925893	0
11	1	1::sp|K2C1_HUMAN|	sp|K2C1_HUMAN|	231	65847	42.3	10310	1	1	0	7383974	0
11	1	1::sp|K2C1_HUMAN|	sp|K2C1_HUMAN|	231	65847	42.3	10311	1	1	0	4926009	0
11	1	1::sp|K2C1_HUMAN|	sp|K2C1_HUMAN|	231	65847	42.3	10312	1	1	0	7383983	0
11	1	1::sp|K2C1_HUMAN|	sp|K2C1_HUMAN|	231	65847	42.3	12109	1	1	1	8589313	0
11	1	1::sp|K2C1_HUMAN|	sp|K2C1_HUMAN|	231	65847	42.3	12110	1	1	1	5729571	0
11	1	1::sp|K2C1_HUMAN|	sp|K2C1_HUMAN|	231	65847	42.3	12111	1	1	1	5729571	0
11	1	1::sp|K2C1_HUMAN|	sp|K2C1_HUMAN|	231	65847	42.3	13550	1	1	1	6653312	0
11	1	1::sp|K2C1_HUMAN|	sp|K2C1_HUMAN|	231	65847	42.3	13551	1	1	1	6653321	0
11	1	1::sp|K2C1_HUMAN|	sp|K2C1_HUMAN|	231	65847	42.3	13552	1	1	1	6653324	0
11	1	1::sp|K2C1_HUMAN|	sp|K2C1_HUMAN|	231	65847	42.3	14831	1	1	1	7953240	0	emPAI	0.61
11	2	1::sp|K22E_HUMAN|	sp|K22E_HUMAN|	73	65825	19.7	4498	1	0	1	4142195	0
11	2	1::sp|K22E_HUMAN|	sp|K22E_HUMAN|	73	65825	19.7	5642	1	0	0	4557115	0
11	2	1::sp|K22E_HUMAN|	sp|K22E_HUMAN|	73	65825	19.7	6325	1	0	0	4872700	0
11	2	1::sp|K22E_HUMAN|	sp|K22E_HUMAN|	73	65825	19.7	6327	1	0	0	4872705	0
11	2	1::sp|K22E_HUMAN|	sp|K22E_HUMAN|	73	65825	19.7	6503	1	0	1	3321945	0
11	2	1::sp|K22E_HUMAN|	sp|K22E_HUMAN|	73	65825	19.7	6893	1	0	1	5212834	0
11	2	1::sp|K22E_HUMAN|	sp|K22E_HUMAN|	73	65825	19.7	7080	1	0	0	3561772	1
11	2	1::sp|K22E_HUMAN|	sp|K22E_HUMAN|	73	65825	19.7	7081	1	0	0	5337625	1
11	2	1::sp|K22E_HUMAN|	sp|K22E_HUMAN|	73	65825	19.7	8307	1	0	1	6048132	0
11	2	1::sp|K22E_HUMAN|	sp|K22E_HUMAN|	73	65825	19.7	9249	1	0	1	6653677	0
11	2	1::sp|K22E_HUMAN|	sp|K22E_HUMAN|	73	65825	19.7	9250	1	0	1	4439143	0
11	2	1::sp|K22E_HUMAN|	sp|K22E_HUMAN|	73	65825	19.7	9251	1	0	1	4439150	0
11	2	1::sp|K22E_HUMAN|	sp|K22E_HUMAN|	73	65825	19.7	9252	1	0	1	6653693	0
11	2	1::sp|K22E_HUMAN|	sp|K22E_HUMAN|	73	65825	19.7	9565	1	0	1	6863600	0
11	2	1::sp|K22E_HUMAN|	sp|K22E_HUMAN|	73	65825	19.7	9566	1	0	1	4579098	0
11	2	1::sp|K22E_HUMAN|	sp|K22E_HUMAN|	73	65825	19.7	10221	1	0	1	7309053	0
11	2	1::sp|K22E_HUMAN|	sp|K22E_HUMAN|	73	65825	19.7	10226	1	0	1	7309056	0
11	2	1::sp|K22E_HUMAN|	sp|K22E_HUMAN|	73	65825	19.7	10227	1	0	1	4876064	0
11	2	1::sp|K22E_HUMAN|	sp|K22E_HUMAN|	73	65825	19.7	10310	1	0	0	7383974	0
11	2	1::sp|K22E_HUMAN|	sp|K22E_HUMAN|	73	65825	19.7	10311	1	0	0	4926009	0
11	2	1::sp|K22E_HUMAN|	sp|K22E_HUMAN|	73	65825	19.7	10312	1	0	0	7383983	0
11	2	1::sp|K22E_HUMAN|	sp|K22E_HUMAN|	73	65825	19.7	15674	1	0	1	7628781	0	emPAI	0.09
11		2::H9KZP2_CHICK	Uncharacterized protein (Fragment) OS=Gallus gallus GN=KRT8 PE=3 SV=2	82	42104	19.0	3377	1	0	1	3566725	0
11		2::H9KZP2_CHICK	Uncharacterized protein (Fragment) OS=Gallus gallus GN=KRT8 PE=3 SV=2	82	42104	19.0	5613	1	0	1	4537380	0
11		2::H9KZP2_CHICK	Uncharacterized protein (Fragment) OS=Gallus gallus GN=KRT8 PE=3 SV=2	82	42104	19.0	5614	1	0	1	4537382	0
11		2::H9KZP2_CHICK	Uncharacterized protein (Fragment) OS=Gallus gallus GN=KRT8 PE=3 SV=2	82	42104	19.0	5899	1	0	0	4667383	0
11		2::H9KZP2_CHICK	Uncharacterized protein (Fragment) OS=Gallus gallus GN=KRT8 PE=3 SV=2	82	42104	19.0	5900	1	0	0	4667385	0
11		2::H9KZP2_CHICK	Uncharacterized protein (Fragment) OS=Gallus gallus GN=KRT8 PE=3 SV=2	82	42104	19.0	5902	1	0	0	4667386	0
11		2::H9KZP2_CHICK	Uncharacterized protein (Fragment) OS=Gallus gallus GN=KRT8 PE=3 SV=2	82	42104	19.0	5905	1	0	0	4667388	0
11		2::H9KZP2_CHICK	Uncharacterized protein (Fragment) OS=Gallus gallus GN=KRT8 PE=3 SV=2	82	42104	19.0	6779	2	0	1	5152705	0
11		2::H9KZP2_CHICK	Uncharacterized protein (Fragment) OS=Gallus gallus GN=KRT8 PE=3 SV=2	82	42104	19.0	8836	1	0	1	6393592	0
11		2::H9KZP2_CHICK	Uncharacterized protein (Fragment) OS=Gallus gallus GN=KRT8 PE=3 SV=2	82	42104	19.0	9002	1	0	1	6518624	0
11		2::H9KZP2_CHICK	Uncharacterized protein (Fragment) OS=Gallus gallus GN=KRT8 PE=3 SV=2	82	42104	19.0	9003	1	0	1	6518625	0
11		2::H9KZP2_CHICK	Uncharacterized protein (Fragment) OS=Gallus gallus GN=KRT8 PE=3 SV=2	82	42104	19.0	9004	2	0	1	4349110	0
11		2::H9KZP2_CHICK	Uncharacterized protein (Fragment) OS=Gallus gallus GN=KRT8 PE=3 SV=2	82	42104	19.0	9005	1	0	1	4349110	0
11		2::H9KZP2_CHICK	Uncharacterized protein (Fragment) OS=Gallus gallus GN=KRT8 PE=3 SV=2	82	42104	19.0	9006	1	0	1	6518634	0
11		2::H9KZP2_CHICK	Uncharacterized protein (Fragment) OS=Gallus gallus GN=KRT8 PE=3 SV=2	82	42104	19.0	9007	1	0	1	6518635	0
11		2::H9KZP2_CHICK	Uncharacterized protein (Fragment) OS=Gallus gallus GN=KRT8 PE=3 SV=2	82	42104	19.0	10083	1	0	1	4812731	1
11		2::H9KZP2_CHICK	Uncharacterized protein (Fragment) OS=Gallus gallus GN=KRT8 PE=3 SV=2	82	42104	19.0	10674	5	0	1	7633950	1
11		2::H9KZ27_CHICK	Uncharacterized protein OS=Gallus gallus GN=KRT6A PE=3 SV=1	67	56972	9.2	2562	1	0	1	3161869	1
11		2::H9KZ27_CHICK	Uncharacterized protein OS=Gallus gallus GN=KRT6A PE=3 SV=1	67	56972	9.2	3377	1	0	1	3566725	0
11		2::H9KZ27_CHICK	Uncharacterized protein OS=Gallus gallus GN=KRT6A PE=3 SV=1	67	56972	9.2	4498	1	0	1	4142195	0
11		2::H9KZ27_CHICK	Uncharacterized protein OS=Gallus gallus GN=KRT6A PE=3 SV=1	67	56972	9.2	5613	1	0	1	4537380	0
11		2::H9KZ27_CHICK	Uncharacterized protein OS=Gallus gallus GN=KRT6A PE=3 SV=1	67	56972	9.2	5614	1	0	1	4537382	0
11		2::H9KZ27_CHICK	Uncharacterized protein OS=Gallus gallus GN=KRT6A PE=3 SV=1	67	56972	9.2	8836	1	0	1	6393592	0
11		2::H9KZ27_CHICK	Uncharacterized protein OS=Gallus gallus GN=KRT6A PE=3 SV=1	67	56972	9.2	9249	1	0	1	6653677	0
11		2::H9KZ27_CHICK	Uncharacterized protein OS=Gallus gallus GN=KRT6A PE=3 SV=1	67	56972	9.2	9250	1	0	1	4439143	0
11		2::H9KZ27_CHICK	Uncharacterized protein OS=Gallus gallus GN=KRT6A PE=3 SV=1	67	56972	9.2	9251	1	0	1	4439150	0
11		2::H9KZ27_CHICK	Uncharacterized protein OS=Gallus gallus GN=KRT6A PE=3 SV=1	67	56972	9.2	9252	1	0	1	6653693	0
12	1	2::F1NFE0_CHICK	Collagen alpha-1(VI) chain OS=Gallus gallus GN=COL6A1 PE=4 SV=2	217	107901	23.3	2162	1	1	1	2961587	0
12	1	2::F1NFE0_CHICK	Collagen alpha-1(VI) chain OS=Gallus gallus GN=COL6A1 PE=4 SV=2	217	107901	23.3	2333	1	1	1	3087053	0
12	1	2::F1NFE0_CHICK	Collagen alpha-1(VI) chain OS=Gallus gallus GN=COL6A1 PE=4 SV=2	217	107901	23.3	2334	1	1	1	3087054	0
12	1	2::F1NFE0_CHICK	Collagen alpha-1(VI) chain OS=Gallus gallus GN=COL6A1 PE=4 SV=2	217	107901	23.3	2335	1	1	1	3087055	0
12	1	2::F1NFE0_CHICK	Collagen alpha-1(VI) chain OS=Gallus gallus GN=COL6A1 PE=4 SV=2	217	107901	23.3	2336	1	1	1	3087056	0
12	1	2::F1NFE0_CHICK	Collagen alpha-1(VI) chain OS=Gallus gallus GN=COL6A1 PE=4 SV=2	217	107901	23.3	3495	1	1	1	3631777	0
12	1	2::F1NFE0_CHICK	Collagen alpha-1(VI) chain OS=Gallus gallus GN=COL6A1 PE=4 SV=2	217	107901	23.3	4268	1	1	1	4012332	0
12	1	2::F1NFE0_CHICK	Collagen alpha-1(VI) chain OS=Gallus gallus GN=COL6A1 PE=4 SV=2	217	107901	23.3	4278	3	0	1	4017253	0
12	1	2::F1NFE0_CHICK	Collagen alpha-1(VI) chain OS=Gallus gallus GN=COL6A1 PE=4 SV=2	217	107901	23.3	4447	1	1	1	4111934	0
12	1	2::F1NFE0_CHICK	Collagen alpha-1(VI) chain OS=Gallus gallus GN=COL6A1 PE=4 SV=2	217	107901	23.3	4448	1	1	1	4111936	0
12	1	2::F1NFE0_CHICK	Collagen alpha-1(VI) chain OS=Gallus gallus GN=COL6A1 PE=4 SV=2	217	107901	23.3	5171	1	1	1	4377435	0
12	1	2::F1NFE0_CHICK	Collagen alpha-1(VI) chain OS=Gallus gallus GN=COL6A1 PE=4 SV=2	217	107901	23.3	5172	1	1	1	4377442	0
12	1	2::F1NFE0_CHICK	Collagen alpha-1(VI) chain OS=Gallus gallus GN=COL6A1 PE=4 SV=2	217	107901	23.3	5943	1	1	1	4692956	0
12	1	2::F1NFE0_CHICK	Collagen alpha-1(VI) chain OS=Gallus gallus GN=COL6A1 PE=4 SV=2	217	107901	23.3	5944	1	1	1	3131996	0
12	1	2::F1NFE0_CHICK	Collagen alpha-1(VI) chain OS=Gallus gallus GN=COL6A1 PE=4 SV=2	217	107901	23.3	6059	1	1	1	4742356	0
12	1	2::F1NFE0_CHICK	Collagen alpha-1(VI) chain OS=Gallus gallus GN=COL6A1 PE=4 SV=2	217	107901	23.3	6060	1	1	1	4742357	0
12	1	2::F1NFE0_CHICK	Collagen alpha-1(VI) chain OS=Gallus gallus GN=COL6A1 PE=4 SV=2	217	107901	23.3	7936	1	1	1	5833173	0
12	1	2::F1NFE0_CHICK	Collagen alpha-1(VI) chain OS=Gallus gallus GN=COL6A1 PE=4 SV=2	217	107901	23.3	8813	1	1	1	6377869	0
12	1	2::F1NFE0_CHICK	Collagen alpha-1(VI) chain OS=Gallus gallus GN=COL6A1 PE=4 SV=2	217	107901	23.3	8903	1	1	1	4295679	0
12	1	2::F1NFE0_CHICK	Collagen alpha-1(VI) chain OS=Gallus gallus GN=COL6A1 PE=4 SV=2	217	107901	23.3	8972	1	1	1	4342603	0
12	1	2::F1NFE0_CHICK	Collagen alpha-1(VI) chain OS=Gallus gallus GN=COL6A1 PE=4 SV=2	217	107901	23.3	8973	1	1	1	4342604	0
12	1	2::F1NFE0_CHICK	Collagen alpha-1(VI) chain OS=Gallus gallus GN=COL6A1 PE=4 SV=2	217	107901	23.3	8974	1	1	1	4342605	0
12	1	2::F1NFE0_CHICK	Collagen alpha-1(VI) chain OS=Gallus gallus GN=COL6A1 PE=4 SV=2	217	107901	23.3	10136	1	1	1	7248739	0
12	1	2::F1NFE0_CHICK	Collagen alpha-1(VI) chain OS=Gallus gallus GN=COL6A1 PE=4 SV=2	217	107901	23.3	10137	1	1	1	4835851	0
12	1	2::F1NFE0_CHICK	Collagen alpha-1(VI) chain OS=Gallus gallus GN=COL6A1 PE=4 SV=2	217	107901	23.3	10980	1	1	1	5219439	0
12	1	2::F1NFE0_CHICK	Collagen alpha-1(VI) chain OS=Gallus gallus GN=COL6A1 PE=4 SV=2	217	107901	23.3	10981	1	1	1	7824122	0
12	1	2::F1NFE0_CHICK	Collagen alpha-1(VI) chain OS=Gallus gallus GN=COL6A1 PE=4 SV=2	217	107901	23.3	11427	1	1	1	5409516	0
12	1	2::F1NFE0_CHICK	Collagen alpha-1(VI) chain OS=Gallus gallus GN=COL6A1 PE=4 SV=2	217	107901	23.3	11428	1	1	1	8109240	0
12	1	2::F1NFE0_CHICK	Collagen alpha-1(VI) chain OS=Gallus gallus GN=COL6A1 PE=4 SV=2	217	107901	23.3	11970	1	1	1	5682923	0
12	1	2::F1NFE0_CHICK	Collagen alpha-1(VI) chain OS=Gallus gallus GN=COL6A1 PE=4 SV=2	217	107901	23.3	11992	1	1	1	5686395	0
12	1	2::F1NFE0_CHICK	Collagen alpha-1(VI) chain OS=Gallus gallus GN=COL6A1 PE=4 SV=2	217	107901	23.3	11993	1	1	1	8524559	0
12	1	2::F1NFE0_CHICK	Collagen alpha-1(VI) chain OS=Gallus gallus GN=COL6A1 PE=4 SV=2	217	107901	23.3	11994	1	1	1	5686400	0
12	1	2::F1NFE0_CHICK	Collagen alpha-1(VI) chain OS=Gallus gallus GN=COL6A1 PE=4 SV=2	217	107901	23.3	13088	1	1	1	6303253	0
12	1	2::F1NFE0_CHICK	Collagen alpha-1(VI) chain OS=Gallus gallus GN=COL6A1 PE=4 SV=2	217	107901	23.3	13089	1	1	1	9449855	0
12	1	2::F1NFE0_CHICK	Collagen alpha-1(VI) chain OS=Gallus gallus GN=COL6A1 PE=4 SV=2	217	107901	23.3	13949	1	1	1	7020470	0
12	1	2::F1NFE0_CHICK	Collagen alpha-1(VI) chain OS=Gallus gallus GN=COL6A1 PE=4 SV=2	217	107901	23.3	13950	1	1	1	5267875	0
12	1	2::F1NFE0_CHICK	Collagen alpha-1(VI) chain OS=Gallus gallus GN=COL6A1 PE=4 SV=2	217	107901	23.3	13951	1	1	1	7020477	0
12	1	2::F1NFE0_CHICK	Collagen alpha-1(VI) chain OS=Gallus gallus GN=COL6A1 PE=4 SV=2	217	107901	23.3	13952	1	1	1	10525691	0
12	1	2::F1NFE0_CHICK	Collagen alpha-1(VI) chain OS=Gallus gallus GN=COL6A1 PE=4 SV=2	217	107901	23.3	15604	1	1	1	7323879	0
12	1	2::F1NFE0_CHICK	Collagen alpha-1(VI) chain OS=Gallus gallus GN=COL6A1 PE=4 SV=2	217	107901	23.3	15605	1	1	1	9761816	0
12	1	2::F1NFE0_CHICK	Collagen alpha-1(VI) chain OS=Gallus gallus GN=COL6A1 PE=4 SV=2	217	107901	23.3	15606	1	1	1	7323882	0
12	1	2::F1NFE0_CHICK	Collagen alpha-1(VI) chain OS=Gallus gallus GN=COL6A1 PE=4 SV=2	217	107901	23.3	15607	1	1	1	9761839	0
12	1	2::F1NFE0_CHICK	Collagen alpha-1(VI) chain OS=Gallus gallus GN=COL6A1 PE=4 SV=2	217	107901	23.3	15616	1	1	1	9765188	0
12	1	2::F1NFE0_CHICK	Collagen alpha-1(VI) chain OS=Gallus gallus GN=COL6A1 PE=4 SV=2	217	107901	23.3	13374	1	1	1	9768516	0	emPAI	0.30
13	1	1::sp|K1C9_HUMAN|	sp|K1C9_HUMAN|	193	62092	44.1	1376	3	1	1	2661615	0
13	1	1::sp|K1C9_HUMAN|	sp|K1C9_HUMAN|	193	62092	44.1	3768	2	1	1	3751847	0
13	1	1::sp|K1C9_HUMAN|	sp|K1C9_HUMAN|	193	62092	44.1	3769	1	1	1	3751849	0
13	1	1::sp|K1C9_HUMAN|	sp|K1C9_HUMAN|	193	62092	44.1	6275	2	1	1	4842308	0
13	1	1::sp|K1C9_HUMAN|	sp|K1C9_HUMAN|	193	62092	44.1	7033	1	1	1	5307865	0
13	1	1::sp|K1C9_HUMAN|	sp|K1C9_HUMAN|	193	62092	44.1	7035	1	1	1	5307869	0
13	1	1::sp|K1C9_HUMAN|	sp|K1C9_HUMAN|	193	62092	44.1	7072	1	1	1	5332540	0
13	1	1::sp|K1C9_HUMAN|	sp|K1C9_HUMAN|	193	62092	44.1	7079	1	1	1	5337544	0
13	1	1::sp|K1C9_HUMAN|	sp|K1C9_HUMAN|	193	62092	44.1	7537	1	1	1	5612960	0
13	1	1::sp|K1C9_HUMAN|	sp|K1C9_HUMAN|	193	62092	44.1	7858	1	1	1	5793015	0
13	1	1::sp|K1C9_HUMAN|	sp|K1C9_HUMAN|	193	62092	44.1	7862	1	1	1	5797921	0
13	1	1::sp|K1C9_HUMAN|	sp|K1C9_HUMAN|	193	62092	44.1	8149	1	1	1	5958095	0
13	1	1::sp|K1C9_HUMAN|	sp|K1C9_HUMAN|	193	62092	44.1	8282	1	1	1	6038079	0
13	1	1::sp|K1C9_HUMAN|	sp|K1C9_HUMAN|	193	62092	44.1	8520	1	1	1	6168034	0
13	1	1::sp|K1C9_HUMAN|	sp|K1C9_HUMAN|	193	62092	44.1	8538	1	1	1	6182689	0
13	1	1::sp|K1C9_HUMAN|	sp|K1C9_HUMAN|	193	62092	44.1	9121	1	1	1	6583482	0
13	1	1::sp|K1C9_HUMAN|	sp|K1C9_HUMAN|	193	62092	44.1	11142	1	1	1	7938875	0
13	1	1::sp|K1C9_HUMAN|	sp|K1C9_HUMAN|	193	62092	44.1	11143	1	1	1	5295944	0
13	1	1::sp|K1C9_HUMAN|	sp|K1C9_HUMAN|	193	62092	44.1	12567	1	1	1	8963690	0
13	1	1::sp|K1C9_HUMAN|	sp|K1C9_HUMAN|	193	62092	44.1	12840	1	1	1	9194882	0
13	1	1::sp|K1C9_HUMAN|	sp|K1C9_HUMAN|	193	62092	44.1	12841	1	1	1	6133280	0
13	1	1::sp|K1C9_HUMAN|	sp|K1C9_HUMAN|	193	62092	44.1	12842	1	1	1	6133283	0
13	1	1::sp|K1C9_HUMAN|	sp|K1C9_HUMAN|	193	62092	44.1	12843	1	1	1	6133285	0
13	1	1::sp|K1C9_HUMAN|	sp|K1C9_HUMAN|	193	62092	44.1	14247	1	1	1	7243478	0
13	1	1::sp|K1C9_HUMAN|	sp|K1C9_HUMAN|	193	62092	44.1	14248	1	1	1	7243482	0
13	1	1::sp|K1C9_HUMAN|	sp|K1C9_HUMAN|	193	62092	44.1	14251	1	1	1	10860201	0
13	1	1::sp|K1C9_HUMAN|	sp|K1C9_HUMAN|	193	62092	44.1	15082	1	1	1	8373843	0
13	1	1::sp|K1C9_HUMAN|	sp|K1C9_HUMAN|	193	62092	44.1	15083	1	1	1	8373844	0
13	1	1::sp|K1C9_HUMAN|	sp|K1C9_HUMAN|	193	62092	44.1	15090	1	1	1	8394035	0
13	1	1::sp|K1C9_HUMAN|	sp|K1C9_HUMAN|	193	62092	44.1	15569	1	1	1	7263593	1
13	1	1::sp|K1C9_HUMAN|	sp|K1C9_HUMAN|	193	62092	44.1	15570	1	1	1	9681444	1
13	1	1::sp|K1C9_HUMAN|	sp|K1C9_HUMAN|	193	62092	44.1	15806	1	1	1	8168863	0
13	1	1::sp|K1C9_HUMAN|	sp|K1C9_HUMAN|	193	62092	44.1	15807	1	1	1	10888469	0	emPAI	0.58
14	1	2::A0A0A0MQ64_CHICK	Histone H2B (Fragment) OS=Gallus gallus GN=HIST1H2B5L PE=3 SV=1	192	15869	50.7	2866	1	1	1	3326851	0
14	1	2::A0A0A0MQ64_CHICK	Histone H2B (Fragment) OS=Gallus gallus GN=HIST1H2B5L PE=3 SV=1	192	15869	50.7	2867	1	1	1	3326856	0
14	1	2::A0A0A0MQ64_CHICK	Histone H2B (Fragment) OS=Gallus gallus GN=HIST1H2B5L PE=3 SV=1	192	15869	50.7	3300	1	1	1	3521905	0
14	1	2::A0A0A0MQ64_CHICK	Histone H2B (Fragment) OS=Gallus gallus GN=HIST1H2B5L PE=3 SV=1	192	15869	50.7	3301	1	1	1	3521906	0
14	1	2::A0A0A0MQ64_CHICK	Histone H2B (Fragment) OS=Gallus gallus GN=HIST1H2B5L PE=3 SV=1	192	15869	50.7	4394	1	1	1	4087325	0
14	1	2::A0A0A0MQ64_CHICK	Histone H2B (Fragment) OS=Gallus gallus GN=HIST1H2B5L PE=3 SV=1	192	15869	50.7	4396	2	1	1	4087330	0
14	1	2::A0A0A0MQ64_CHICK	Histone H2B (Fragment) OS=Gallus gallus GN=HIST1H2B5L PE=3 SV=1	192	15869	50.7	4397	1	1	1	4087330	0
14	1	2::A0A0A0MQ64_CHICK	Histone H2B (Fragment) OS=Gallus gallus GN=HIST1H2B5L PE=3 SV=1	192	15869	50.7	4505	1	1	1	4147146	0
14	1	2::A0A0A0MQ64_CHICK	Histone H2B (Fragment) OS=Gallus gallus GN=HIST1H2B5L PE=3 SV=1	192	15869	50.7	6122	1	1	1	4773058	0
14	1	2::A0A0A0MQ64_CHICK	Histone H2B (Fragment) OS=Gallus gallus GN=HIST1H2B5L PE=3 SV=1	192	15869	50.7	6123	1	1	1	4773064	0
14	1	2::A0A0A0MQ64_CHICK	Histone H2B (Fragment) OS=Gallus gallus GN=HIST1H2B5L PE=3 SV=1	192	15869	50.7	6124	1	1	1	4773074	0
14	1	2::A0A0A0MQ64_CHICK	Histone H2B (Fragment) OS=Gallus gallus GN=HIST1H2B5L PE=3 SV=1	192	15869	50.7	7795	1	1	1	5762852	0
14	1	2::A0A0A0MQ64_CHICK	Histone H2B (Fragment) OS=Gallus gallus GN=HIST1H2B5L PE=3 SV=1	192	15869	50.7	7963	1	1	1	5848023	0
14	1	2::A0A0A0MQ64_CHICK	Histone H2B (Fragment) OS=Gallus gallus GN=HIST1H2B5L PE=3 SV=1	192	15869	50.7	7964	1	1	1	3902040	0
14	1	2::A0A0A0MQ64_CHICK	Histone H2B (Fragment) OS=Gallus gallus GN=HIST1H2B5L PE=3 SV=1	192	15869	50.7	7965	1	1	1	3902040	0
14	1	2::A0A0A0MQ64_CHICK	Histone H2B (Fragment) OS=Gallus gallus GN=HIST1H2B5L PE=3 SV=1	192	15869	50.7	7966	1	1	1	5848025	0
14	1	2::A0A0A0MQ64_CHICK	Histone H2B (Fragment) OS=Gallus gallus GN=HIST1H2B5L PE=3 SV=1	192	15869	50.7	7967	1	1	1	5848028	0
14	1	2::A0A0A0MQ64_CHICK	Histone H2B (Fragment) OS=Gallus gallus GN=HIST1H2B5L PE=3 SV=1	192	15869	50.7	7968	1	1	1	3902045	0
14	1	2::A0A0A0MQ64_CHICK	Histone H2B (Fragment) OS=Gallus gallus GN=HIST1H2B5L PE=3 SV=1	192	15869	50.7	12309	1	1	1	8724103	0
14	1	2::A0A0A0MQ64_CHICK	Histone H2B (Fragment) OS=Gallus gallus GN=HIST1H2B5L PE=3 SV=1	192	15869	50.7	12310	1	1	1	8724147	0
14	1	2::A0A0A0MQ64_CHICK	Histone H2B (Fragment) OS=Gallus gallus GN=HIST1H2B5L PE=3 SV=1	192	15869	50.7	12311	1	1	1	8724152	0
14	1	2::A0A0A0MQ64_CHICK	Histone H2B (Fragment) OS=Gallus gallus GN=HIST1H2B5L PE=3 SV=1	192	15869	50.7	12312	1	1	1	5819460	0
14	1	2::A0A0A0MQ64_CHICK	Histone H2B (Fragment) OS=Gallus gallus GN=HIST1H2B5L PE=3 SV=1	192	15869	50.7	12313	1	1	1	5819461	0
14	1	2::A0A0A0MQ64_CHICK	Histone H2B (Fragment) OS=Gallus gallus GN=HIST1H2B5L PE=3 SV=1	192	15869	50.7	12314	1	0	1	5819463	0
14	1	2::A0A0A0MQ64_CHICK	Histone H2B (Fragment) OS=Gallus gallus GN=HIST1H2B5L PE=3 SV=1	192	15869	50.7	12323	1	1	1	8729057	0
14	1	2::A0A0A0MQ64_CHICK	Histone H2B (Fragment) OS=Gallus gallus GN=HIST1H2B5L PE=3 SV=1	192	15869	50.7	12324	1	1	1	5822739	0
14	1	2::A0A0A0MQ64_CHICK	Histone H2B (Fragment) OS=Gallus gallus GN=HIST1H2B5L PE=3 SV=1	192	15869	50.7	12325	1	1	1	8729072	0
14	1	2::A0A0A0MQ64_CHICK	Histone H2B (Fragment) OS=Gallus gallus GN=HIST1H2B5L PE=3 SV=1	192	15869	50.7	12326	1	1	1	8729081	0
14	1	2::A0A0A0MQ64_CHICK	Histone H2B (Fragment) OS=Gallus gallus GN=HIST1H2B5L PE=3 SV=1	192	15869	50.7	12327	1	1	1	5822749	0
14	1	2::A0A0A0MQ64_CHICK	Histone H2B (Fragment) OS=Gallus gallus GN=HIST1H2B5L PE=3 SV=1	192	15869	50.7	12328	1	1	1	8729093	0
14	1	2::A0A0A0MQ64_CHICK	Histone H2B (Fragment) OS=Gallus gallus GN=HIST1H2B5L PE=3 SV=1	192	15869	50.7	12416	1	1	1	8804129	0
14	1	2::A0A0A0MQ64_CHICK	Histone H2B (Fragment) OS=Gallus gallus GN=HIST1H2B5L PE=3 SV=1	192	15869	50.7	12417	1	1	1	5872780	0
14	1	2::A0A0A0MQ64_CHICK	Histone H2B (Fragment) OS=Gallus gallus GN=HIST1H2B5L PE=3 SV=1	192	15869	50.7	12418	1	1	1	8804136	0
14	1	2::A0A0A0MQ64_CHICK	Histone H2B (Fragment) OS=Gallus gallus GN=HIST1H2B5L PE=3 SV=1	192	15869	50.7	12419	1	1	1	5872783	0	emPAI	1.79
14		2::F1NF30_CHICK	Histone H2B (Fragment) OS=Gallus gallus GN=LOC426037 PE=3 SV=1	57	13537	51.6	2866	1	0	1	3326851	0
14		2::F1NF30_CHICK	Histone H2B (Fragment) OS=Gallus gallus GN=LOC426037 PE=3 SV=1	57	13537	51.6	2867	1	0	1	3326856	0
14		2::F1NF30_CHICK	Histone H2B (Fragment) OS=Gallus gallus GN=LOC426037 PE=3 SV=1	57	13537	51.6	4505	1	0	1	4147146	0
14		2::F1NF30_CHICK	Histone H2B (Fragment) OS=Gallus gallus GN=LOC426037 PE=3 SV=1	57	13537	51.6	6122	1	0	1	4773058	0
14		2::F1NF30_CHICK	Histone H2B (Fragment) OS=Gallus gallus GN=LOC426037 PE=3 SV=1	57	13537	51.6	6123	1	0	1	4773064	0
14		2::F1NF30_CHICK	Histone H2B (Fragment) OS=Gallus gallus GN=LOC426037 PE=3 SV=1	57	13537	51.6	6124	1	0	1	4773074	0
14		2::F1NF30_CHICK	Histone H2B (Fragment) OS=Gallus gallus GN=LOC426037 PE=3 SV=1	57	13537	51.6	7963	1	0	1	5848023	0
14		2::F1NF30_CHICK	Histone H2B (Fragment) OS=Gallus gallus GN=LOC426037 PE=3 SV=1	57	13537	51.6	7964	1	0	1	3902040	0
14		2::F1NF30_CHICK	Histone H2B (Fragment) OS=Gallus gallus GN=LOC426037 PE=3 SV=1	57	13537	51.6	7965	1	0	1	3902040	0
14		2::F1NF30_CHICK	Histone H2B (Fragment) OS=Gallus gallus GN=LOC426037 PE=3 SV=1	57	13537	51.6	7966	1	0	1	5848025	0
14		2::F1NF30_CHICK	Histone H2B (Fragment) OS=Gallus gallus GN=LOC426037 PE=3 SV=1	57	13537	51.6	7967	1	0	1	5848028	0
14		2::F1NF30_CHICK	Histone H2B (Fragment) OS=Gallus gallus GN=LOC426037 PE=3 SV=1	57	13537	51.6	7968	1	0	1	3902045	0
14		2::F1NF30_CHICK	Histone H2B (Fragment) OS=Gallus gallus GN=LOC426037 PE=3 SV=1	57	13537	51.6	11506	2	0	1	5442888	1
14		2::F1NF30_CHICK	Histone H2B (Fragment) OS=Gallus gallus GN=LOC426037 PE=3 SV=1	57	13537	51.6	12479	1	0	1	5919494	0
14		2::F1NF30_CHICK	Histone H2B (Fragment) OS=Gallus gallus GN=LOC426037 PE=3 SV=1	57	13537	51.6	12480	1	0	1	8874215	0
15	1	2::R9PXN4_CHICK	Alpha-actinin-1 (Fragment) OS=Gallus gallus GN=ACTN1 PE=4 SV=1	185	101841	46.1	2936	1	1	1	3376955	0
15	1	2::R9PXN4_CHICK	Alpha-actinin-1 (Fragment) OS=Gallus gallus GN=ACTN1 PE=4 SV=1	185	101841	46.1	2974	1	1	0	3401746	0
15	1	2::R9PXN4_CHICK	Alpha-actinin-1 (Fragment) OS=Gallus gallus GN=ACTN1 PE=4 SV=1	185	101841	46.1	3600	1	1	1	3676793	0
15	1	2::R9PXN4_CHICK	Alpha-actinin-1 (Fragment) OS=Gallus gallus GN=ACTN1 PE=4 SV=1	185	101841	46.1	3761	1	1	0	3747161	0
15	1	2::R9PXN4_CHICK	Alpha-actinin-1 (Fragment) OS=Gallus gallus GN=ACTN1 PE=4 SV=1	185	101841	46.1	3763	1	1	0	3747166	0
15	1	2::R9PXN4_CHICK	Alpha-actinin-1 (Fragment) OS=Gallus gallus GN=ACTN1 PE=4 SV=1	185	101841	46.1	4901	1	1	0	4327463	0
15	1	2::R9PXN4_CHICK	Alpha-actinin-1 (Fragment) OS=Gallus gallus GN=ACTN1 PE=4 SV=1	185	101841	46.1	6772	1	1	1	5147811	0
15	1	2::R9PXN4_CHICK	Alpha-actinin-1 (Fragment) OS=Gallus gallus GN=ACTN1 PE=4 SV=1	185	101841	46.1	6773	1	1	1	5147825	0
15	1	2::R9PXN4_CHICK	Alpha-actinin-1 (Fragment) OS=Gallus gallus GN=ACTN1 PE=4 SV=1	185	101841	46.1	6780	1	1	1	5152727	0
15	1	2::R9PXN4_CHICK	Alpha-actinin-1 (Fragment) OS=Gallus gallus GN=ACTN1 PE=4 SV=1	185	101841	46.1	6920	1	1	1	5227808	0
15	1	2::R9PXN4_CHICK	Alpha-actinin-1 (Fragment) OS=Gallus gallus GN=ACTN1 PE=4 SV=1	185	101841	46.1	7633	2	1	0	5653100	1
15	1	2::R9PXN4_CHICK	Alpha-actinin-1 (Fragment) OS=Gallus gallus GN=ACTN1 PE=4 SV=1	185	101841	46.1	7634	2	1	0	5653105	1
15	1	2::R9PXN4_CHICK	Alpha-actinin-1 (Fragment) OS=Gallus gallus GN=ACTN1 PE=4 SV=1	185	101841	46.1	8214	1	1	1	6003205	0
15	1	2::R9PXN4_CHICK	Alpha-actinin-1 (Fragment) OS=Gallus gallus GN=ACTN1 PE=4 SV=1	185	101841	46.1	8215	1	1	1	6003205	0
15	1	2::R9PXN4_CHICK	Alpha-actinin-1 (Fragment) OS=Gallus gallus GN=ACTN1 PE=4 SV=1	185	101841	46.1	8365	1	1	0	6083422	0
15	1	2::R9PXN4_CHICK	Alpha-actinin-1 (Fragment) OS=Gallus gallus GN=ACTN1 PE=4 SV=1	185	101841	46.1	8366	1	1	0	6083425	0
15	1	2::R9PXN4_CHICK	Alpha-actinin-1 (Fragment) OS=Gallus gallus GN=ACTN1 PE=4 SV=1	185	101841	46.1	8474	1	1	1	4098881	0
15	1	2::R9PXN4_CHICK	Alpha-actinin-1 (Fragment) OS=Gallus gallus GN=ACTN1 PE=4 SV=1	185	101841	46.1	8788	1	1	1	6353158	0
15	1	2::R9PXN4_CHICK	Alpha-actinin-1 (Fragment) OS=Gallus gallus GN=ACTN1 PE=4 SV=1	185	101841	46.1	8978	1	1	1	4345411	0
15	1	2::R9PXN4_CHICK	Alpha-actinin-1 (Fragment) OS=Gallus gallus GN=ACTN1 PE=4 SV=1	185	101841	46.1	9059	1	1	1	4369151	0
15	1	2::R9PXN4_CHICK	Alpha-actinin-1 (Fragment) OS=Gallus gallus GN=ACTN1 PE=4 SV=1	185	101841	46.1	9127	1	1	1	4395422	0
15	1	2::R9PXN4_CHICK	Alpha-actinin-1 (Fragment) OS=Gallus gallus GN=ACTN1 PE=4 SV=1	185	101841	46.1	9312	1	1	1	6698102	0
15	1	2::R9PXN4_CHICK	Alpha-actinin-1 (Fragment) OS=Gallus gallus GN=ACTN1 PE=4 SV=1	185	101841	46.1	9572	1	1	1	6868988	0
15	1	2::R9PXN4_CHICK	Alpha-actinin-1 (Fragment) OS=Gallus gallus GN=ACTN1 PE=4 SV=1	185	101841	46.1	9583	1	1	1	6874002	0
15	1	2::R9PXN4_CHICK	Alpha-actinin-1 (Fragment) OS=Gallus gallus GN=ACTN1 PE=4 SV=1	185	101841	46.1	9684	1	1	1	6938923	0
15	1	2::R9PXN4_CHICK	Alpha-actinin-1 (Fragment) OS=Gallus gallus GN=ACTN1 PE=4 SV=1	185	101841	46.1	9685	1	1	1	6938923	0
15	1	2::R9PXN4_CHICK	Alpha-actinin-1 (Fragment) OS=Gallus gallus GN=ACTN1 PE=4 SV=1	185	101841	46.1	9686	1	1	1	4629310	0
15	1	2::R9PXN4_CHICK	Alpha-actinin-1 (Fragment) OS=Gallus gallus GN=ACTN1 PE=4 SV=1	185	101841	46.1	10001	1	1	1	7153872	0
15	1	2::R9PXN4_CHICK	Alpha-actinin-1 (Fragment) OS=Gallus gallus GN=ACTN1 PE=4 SV=1	185	101841	46.1	10002	1	1	1	4772608	0
15	1	2::R9PXN4_CHICK	Alpha-actinin-1 (Fragment) OS=Gallus gallus GN=ACTN1 PE=4 SV=1	185	101841	46.1	10003	1	1	1	7153883	0
15	1	2::R9PXN4_CHICK	Alpha-actinin-1 (Fragment) OS=Gallus gallus GN=ACTN1 PE=4 SV=1	185	101841	46.1	10251	4	1	1	7328638	1
15	1	2::R9PXN4_CHICK	Alpha-actinin-1 (Fragment) OS=Gallus gallus GN=ACTN1 PE=4 SV=1	185	101841	46.1	10650	1	1	1	7613640	0
15	1	2::R9PXN4_CHICK	Alpha-actinin-1 (Fragment) OS=Gallus gallus GN=ACTN1 PE=4 SV=1	185	101841	46.1	10651	1	1	1	5079127	0
15	1	2::R9PXN4_CHICK	Alpha-actinin-1 (Fragment) OS=Gallus gallus GN=ACTN1 PE=4 SV=1	185	101841	46.1	10759	1	1	0	7693932	0
15	1	2::R9PXN4_CHICK	Alpha-actinin-1 (Fragment) OS=Gallus gallus GN=ACTN1 PE=4 SV=1	185	101841	46.1	10760	1	1	0	5132646	0
15	1	2::R9PXN4_CHICK	Alpha-actinin-1 (Fragment) OS=Gallus gallus GN=ACTN1 PE=4 SV=1	185	101841	46.1	10793	1	1	1	7719237	0
15	1	2::R9PXN4_CHICK	Alpha-actinin-1 (Fragment) OS=Gallus gallus GN=ACTN1 PE=4 SV=1	185	101841	46.1	10794	1	1	1	7719246	0
15	1	2::R9PXN4_CHICK	Alpha-actinin-1 (Fragment) OS=Gallus gallus GN=ACTN1 PE=4 SV=1	185	101841	46.1	10795	1	1	1	5149524	0
15	1	2::R9PXN4_CHICK	Alpha-actinin-1 (Fragment) OS=Gallus gallus GN=ACTN1 PE=4 SV=1	185	101841	46.1	11473	1	1	0	5425828	0
15	1	2::R9PXN4_CHICK	Alpha-actinin-1 (Fragment) OS=Gallus gallus GN=ACTN1 PE=4 SV=1	185	101841	46.1	12067	1	1	1	8564624	0
15	1	2::R9PXN4_CHICK	Alpha-actinin-1 (Fragment) OS=Gallus gallus GN=ACTN1 PE=4 SV=1	185	101841	46.1	12068	1	1	1	8564631	0
15	1	2::R9PXN4_CHICK	Alpha-actinin-1 (Fragment) OS=Gallus gallus GN=ACTN1 PE=4 SV=1	185	101841	46.1	12069	1	1	1	5713117	0
15	1	2::R9PXN4_CHICK	Alpha-actinin-1 (Fragment) OS=Gallus gallus GN=ACTN1 PE=4 SV=1	185	101841	46.1	12070	1	1	1	5713118	0
15	1	2::R9PXN4_CHICK	Alpha-actinin-1 (Fragment) OS=Gallus gallus GN=ACTN1 PE=4 SV=1	185	101841	46.1	12211	1	1	1	8653842	0
15	1	2::R9PXN4_CHICK	Alpha-actinin-1 (Fragment) OS=Gallus gallus GN=ACTN1 PE=4 SV=1	185	101841	46.1	12212	1	1	1	5772596	0
15	1	2::R9PXN4_CHICK	Alpha-actinin-1 (Fragment) OS=Gallus gallus GN=ACTN1 PE=4 SV=1	185	101841	46.1	12373	1	1	0	4392127	1
15	1	2::R9PXN4_CHICK	Alpha-actinin-1 (Fragment) OS=Gallus gallus GN=ACTN1 PE=4 SV=1	185	101841	46.1	12421	1	1	1	5872908	0
15	1	2::R9PXN4_CHICK	Alpha-actinin-1 (Fragment) OS=Gallus gallus GN=ACTN1 PE=4 SV=1	185	101841	46.1	12422	1	1	1	5872915	0
15	1	2::R9PXN4_CHICK	Alpha-actinin-1 (Fragment) OS=Gallus gallus GN=ACTN1 PE=4 SV=1	185	101841	46.1	12441	1	1	1	8819283	0
15	1	2::R9PXN4_CHICK	Alpha-actinin-1 (Fragment) OS=Gallus gallus GN=ACTN1 PE=4 SV=1	185	101841	46.1	12960	1	1	1	9314421	0
15	1	2::R9PXN4_CHICK	Alpha-actinin-1 (Fragment) OS=Gallus gallus GN=ACTN1 PE=4 SV=1	185	101841	46.1	13090	1	1	1	6309877	1
15	1	2::R9PXN4_CHICK	Alpha-actinin-1 (Fragment) OS=Gallus gallus GN=ACTN1 PE=4 SV=1	185	101841	46.1	13091	1	1	1	6309880	1
15	1	2::R9PXN4_CHICK	Alpha-actinin-1 (Fragment) OS=Gallus gallus GN=ACTN1 PE=4 SV=1	185	101841	46.1	13601	1	1	1	5022601	0
15	1	2::R9PXN4_CHICK	Alpha-actinin-1 (Fragment) OS=Gallus gallus GN=ACTN1 PE=4 SV=1	185	101841	46.1	13602	1	1	1	6693445	0
15	1	2::R9PXN4_CHICK	Alpha-actinin-1 (Fragment) OS=Gallus gallus GN=ACTN1 PE=4 SV=1	185	101841	46.1	13603	1	1	1	5022605	0
15	1	2::R9PXN4_CHICK	Alpha-actinin-1 (Fragment) OS=Gallus gallus GN=ACTN1 PE=4 SV=1	185	101841	46.1	13761	1	1	1	6846599	0
15	1	2::R9PXN4_CHICK	Alpha-actinin-1 (Fragment) OS=Gallus gallus GN=ACTN1 PE=4 SV=1	185	101841	46.1	13762	1	1	1	10264871	0
15	1	2::R9PXN4_CHICK	Alpha-actinin-1 (Fragment) OS=Gallus gallus GN=ACTN1 PE=4 SV=1	185	101841	46.1	14764	1	1	1	7853942	0
15	1	2::R9PXN4_CHICK	Alpha-actinin-1 (Fragment) OS=Gallus gallus GN=ACTN1 PE=4 SV=1	185	101841	46.1	15476	1	1	0	9367961	0
15	1	2::R9PXN4_CHICK	Alpha-actinin-1 (Fragment) OS=Gallus gallus GN=ACTN1 PE=4 SV=1	185	101841	46.1	15477	1	1	0	9367968	0
15	1	2::R9PXN4_CHICK	Alpha-actinin-1 (Fragment) OS=Gallus gallus GN=ACTN1 PE=4 SV=1	185	101841	46.1	15478	1	1	0	14046943	0	emPAI	0.48
15	2	2::H9L0H3_CHICK	Alpha-actinin-4 (Fragment) OS=Gallus gallus GN=ACTN4 PE=4 SV=2	98	71578	35.8	2974	1	0	0	3401746	0
15	2	2::H9L0H3_CHICK	Alpha-actinin-4 (Fragment) OS=Gallus gallus GN=ACTN4 PE=4 SV=2	98	71578	35.8	3761	1	0	0	3747161	0
15	2	2::H9L0H3_CHICK	Alpha-actinin-4 (Fragment) OS=Gallus gallus GN=ACTN4 PE=4 SV=2	98	71578	35.8	3763	1	0	0	3747166	0
15	2	2::H9L0H3_CHICK	Alpha-actinin-4 (Fragment) OS=Gallus gallus GN=ACTN4 PE=4 SV=2	98	71578	35.8	4901	1	0	0	4327463	0
15	2	2::H9L0H3_CHICK	Alpha-actinin-4 (Fragment) OS=Gallus gallus GN=ACTN4 PE=4 SV=2	98	71578	35.8	5805	1	0	1	4632906	1
15	2	2::H9L0H3_CHICK	Alpha-actinin-4 (Fragment) OS=Gallus gallus GN=ACTN4 PE=4 SV=2	98	71578	35.8	6780	1	0	1	5152727	0
15	2	2::H9L0H3_CHICK	Alpha-actinin-4 (Fragment) OS=Gallus gallus GN=ACTN4 PE=4 SV=2	98	71578	35.8	7633	2	0	0	5653100	1
15	2	2::H9L0H3_CHICK	Alpha-actinin-4 (Fragment) OS=Gallus gallus GN=ACTN4 PE=4 SV=2	98	71578	35.8	7634	2	0	0	5653105	1
15	2	2::H9L0H3_CHICK	Alpha-actinin-4 (Fragment) OS=Gallus gallus GN=ACTN4 PE=4 SV=2	98	71578	35.8	8365	1	0	0	6083422	0
15	2	2::H9L0H3_CHICK	Alpha-actinin-4 (Fragment) OS=Gallus gallus GN=ACTN4 PE=4 SV=2	98	71578	35.8	8366	1	0	0	6083425	0
15	2	2::H9L0H3_CHICK	Alpha-actinin-4 (Fragment) OS=Gallus gallus GN=ACTN4 PE=4 SV=2	98	71578	35.8	8679	1	0	1	6283075	0
15	2	2::H9L0H3_CHICK	Alpha-actinin-4 (Fragment) OS=Gallus gallus GN=ACTN4 PE=4 SV=2	98	71578	35.8	8965	1	0	1	4338953	0
15	2	2::H9L0H3_CHICK	Alpha-actinin-4 (Fragment) OS=Gallus gallus GN=ACTN4 PE=4 SV=2	98	71578	35.8	10554	1	0	1	7543560	0
15	2	2::H9L0H3_CHICK	Alpha-actinin-4 (Fragment) OS=Gallus gallus GN=ACTN4 PE=4 SV=2	98	71578	35.8	10598	1	0	1	7579093	0
15	2	2::H9L0H3_CHICK	Alpha-actinin-4 (Fragment) OS=Gallus gallus GN=ACTN4 PE=4 SV=2	98	71578	35.8	10599	1	0	1	5056088	0
15	2	2::H9L0H3_CHICK	Alpha-actinin-4 (Fragment) OS=Gallus gallus GN=ACTN4 PE=4 SV=2	98	71578	35.8	10759	1	0	0	7693932	0
15	2	2::H9L0H3_CHICK	Alpha-actinin-4 (Fragment) OS=Gallus gallus GN=ACTN4 PE=4 SV=2	98	71578	35.8	10760	1	0	0	5132646	0
15	2	2::H9L0H3_CHICK	Alpha-actinin-4 (Fragment) OS=Gallus gallus GN=ACTN4 PE=4 SV=2	98	71578	35.8	11473	1	0	0	5425828	0
15	2	2::H9L0H3_CHICK	Alpha-actinin-4 (Fragment) OS=Gallus gallus GN=ACTN4 PE=4 SV=2	98	71578	35.8	11963	1	0	1	5679624	0
15	2	2::H9L0H3_CHICK	Alpha-actinin-4 (Fragment) OS=Gallus gallus GN=ACTN4 PE=4 SV=2	98	71578	35.8	12373	1	0	0	4392127	1
15	2	2::H9L0H3_CHICK	Alpha-actinin-4 (Fragment) OS=Gallus gallus GN=ACTN4 PE=4 SV=2	98	71578	35.8	12696	1	0	1	6062985	0
15	2	2::H9L0H3_CHICK	Alpha-actinin-4 (Fragment) OS=Gallus gallus GN=ACTN4 PE=4 SV=2	98	71578	35.8	13513	1	0	1	6626530	0
15	2	2::H9L0H3_CHICK	Alpha-actinin-4 (Fragment) OS=Gallus gallus GN=ACTN4 PE=4 SV=2	98	71578	35.8	13796	1	0	1	6876603	0
15	2	2::H9L0H3_CHICK	Alpha-actinin-4 (Fragment) OS=Gallus gallus GN=ACTN4 PE=4 SV=2	98	71578	35.8	15476	1	0	0	9367961	0
15	2	2::H9L0H3_CHICK	Alpha-actinin-4 (Fragment) OS=Gallus gallus GN=ACTN4 PE=4 SV=2	98	71578	35.8	15477	1	0	0	9367968	0
15	2	2::H9L0H3_CHICK	Alpha-actinin-4 (Fragment) OS=Gallus gallus GN=ACTN4 PE=4 SV=2	98	71578	35.8	15478	1	0	0	14046943	0	emPAI	0.22
15		2::R9PXQ0_CHICK	Alpha-actinin-2 OS=Gallus gallus GN=ACTN2 PE=4 SV=1	98	102768	13.6	2974	1	0	0	3401746	0
15		2::R9PXQ0_CHICK	Alpha-actinin-2 OS=Gallus gallus GN=ACTN2 PE=4 SV=1	98	102768	13.6	3427	2	0	1	3596853	0
15		2::R9PXQ0_CHICK	Alpha-actinin-2 OS=Gallus gallus GN=ACTN2 PE=4 SV=1	98	102768	13.6	6772	1	0	1	5147811	0
15		2::R9PXQ0_CHICK	Alpha-actinin-2 OS=Gallus gallus GN=ACTN2 PE=4 SV=1	98	102768	13.6	6773	1	0	1	5147825	0
15		2::R9PXQ0_CHICK	Alpha-actinin-2 OS=Gallus gallus GN=ACTN2 PE=4 SV=1	98	102768	13.6	6780	1	0	1	5152727	0
15		2::R9PXQ0_CHICK	Alpha-actinin-2 OS=Gallus gallus GN=ACTN2 PE=4 SV=1	98	102768	13.6	8214	1	0	1	6003205	0
15		2::R9PXQ0_CHICK	Alpha-actinin-2 OS=Gallus gallus GN=ACTN2 PE=4 SV=1	98	102768	13.6	8215	1	0	1	6003205	0
15		2::R9PXQ0_CHICK	Alpha-actinin-2 OS=Gallus gallus GN=ACTN2 PE=4 SV=1	98	102768	13.6	8978	1	0	1	4345411	0
15		2::R9PXQ0_CHICK	Alpha-actinin-2 OS=Gallus gallus GN=ACTN2 PE=4 SV=1	98	102768	13.6	9572	1	0	1	6868988	0
15		2::R9PXQ0_CHICK	Alpha-actinin-2 OS=Gallus gallus GN=ACTN2 PE=4 SV=1	98	102768	13.6	9583	1	0	1	6874002	0
15		2::R9PXQ0_CHICK	Alpha-actinin-2 OS=Gallus gallus GN=ACTN2 PE=4 SV=1	98	102768	13.6	10251	4	0	1	7328638	1
15		2::R9PXQ0_CHICK	Alpha-actinin-2 OS=Gallus gallus GN=ACTN2 PE=4 SV=1	98	102768	13.6	10650	1	0	1	7613640	0
15		2::R9PXQ0_CHICK	Alpha-actinin-2 OS=Gallus gallus GN=ACTN2 PE=4 SV=1	98	102768	13.6	10651	1	0	1	5079127	0
15		2::R9PXQ0_CHICK	Alpha-actinin-2 OS=Gallus gallus GN=ACTN2 PE=4 SV=1	98	102768	13.6	10759	1	0	0	7693932	0
15		2::R9PXQ0_CHICK	Alpha-actinin-2 OS=Gallus gallus GN=ACTN2 PE=4 SV=1	98	102768	13.6	10760	1	0	0	5132646	0
15		2::R9PXQ0_CHICK	Alpha-actinin-2 OS=Gallus gallus GN=ACTN2 PE=4 SV=1	98	102768	13.6	10793	1	0	1	7719237	0
15		2::R9PXQ0_CHICK	Alpha-actinin-2 OS=Gallus gallus GN=ACTN2 PE=4 SV=1	98	102768	13.6	10794	1	0	1	7719246	0
15		2::R9PXQ0_CHICK	Alpha-actinin-2 OS=Gallus gallus GN=ACTN2 PE=4 SV=1	98	102768	13.6	10795	1	0	1	5149524	0
15		2::R9PXQ0_CHICK	Alpha-actinin-2 OS=Gallus gallus GN=ACTN2 PE=4 SV=1	98	102768	13.6	11473	1	0	0	5425828	0
15		2::R9PXQ0_CHICK	Alpha-actinin-2 OS=Gallus gallus GN=ACTN2 PE=4 SV=1	98	102768	13.6	12373	1	0	0	4392127	1
15		2::F1NCV1_CHICK	Alpha-actinin-1 (Fragment) OS=Gallus gallus GN=ACTN1 PE=4 SV=2	70	21068	49.7	2936	1	0	1	3376955	0
15		2::F1NCV1_CHICK	Alpha-actinin-1 (Fragment) OS=Gallus gallus GN=ACTN1 PE=4 SV=2	70	21068	49.7	4901	1	0	0	4327463	0
15		2::F1NCV1_CHICK	Alpha-actinin-1 (Fragment) OS=Gallus gallus GN=ACTN1 PE=4 SV=2	70	21068	49.7	8214	1	0	1	6003205	0
15		2::F1NCV1_CHICK	Alpha-actinin-1 (Fragment) OS=Gallus gallus GN=ACTN1 PE=4 SV=2	70	21068	49.7	8215	1	0	1	6003205	0
15		2::F1NCV1_CHICK	Alpha-actinin-1 (Fragment) OS=Gallus gallus GN=ACTN1 PE=4 SV=2	70	21068	49.7	9572	1	0	1	6868988	0
15		2::F1NCV1_CHICK	Alpha-actinin-1 (Fragment) OS=Gallus gallus GN=ACTN1 PE=4 SV=2	70	21068	49.7	9583	1	0	1	6874002	0
15		2::F1NCV1_CHICK	Alpha-actinin-1 (Fragment) OS=Gallus gallus GN=ACTN1 PE=4 SV=2	70	21068	49.7	10251	4	0	1	7328638	1
15		2::F1NCV1_CHICK	Alpha-actinin-1 (Fragment) OS=Gallus gallus GN=ACTN1 PE=4 SV=2	70	21068	49.7	10650	1	0	1	7613640	0
15		2::F1NCV1_CHICK	Alpha-actinin-1 (Fragment) OS=Gallus gallus GN=ACTN1 PE=4 SV=2	70	21068	49.7	10651	1	0	1	5079127	0
15		2::F1NCV1_CHICK	Alpha-actinin-1 (Fragment) OS=Gallus gallus GN=ACTN1 PE=4 SV=2	70	21068	49.7	10759	1	0	0	7693932	0
15		2::F1NCV1_CHICK	Alpha-actinin-1 (Fragment) OS=Gallus gallus GN=ACTN1 PE=4 SV=2	70	21068	49.7	10760	1	0	0	5132646	0
15		2::F1NCV1_CHICK	Alpha-actinin-1 (Fragment) OS=Gallus gallus GN=ACTN1 PE=4 SV=2	70	21068	49.7	10793	1	0	1	7719237	0
15		2::F1NCV1_CHICK	Alpha-actinin-1 (Fragment) OS=Gallus gallus GN=ACTN1 PE=4 SV=2	70	21068	49.7	10794	1	0	1	7719246	0
15		2::F1NCV1_CHICK	Alpha-actinin-1 (Fragment) OS=Gallus gallus GN=ACTN1 PE=4 SV=2	70	21068	49.7	10795	1	0	1	5149524	0
16	1	2::F1NGA2_CHICK	ATP synthase subunit alpha OS=Gallus gallus GN=ATP5A1W PE=3 SV=2	176	59991	33.5	3412	1	1	1	3587320	0
16	1	2::F1NGA2_CHICK	ATP synthase subunit alpha OS=Gallus gallus GN=ATP5A1W PE=3 SV=2	176	59991	33.5	3413	1	1	1	3587320	0
16	1	2::F1NGA2_CHICK	ATP synthase subunit alpha OS=Gallus gallus GN=ATP5A1W PE=3 SV=2	176	59991	33.5	4897	1	1	1	4327107	0
16	1	2::F1NGA2_CHICK	ATP synthase subunit alpha OS=Gallus gallus GN=ATP5A1W PE=3 SV=2	176	59991	33.5	4898	1	1	1	4327111	0
16	1	2::F1NGA2_CHICK	ATP synthase subunit alpha OS=Gallus gallus GN=ATP5A1W PE=3 SV=2	176	59991	33.5	5362	1	1	1	4462252	0
16	1	2::F1NGA2_CHICK	ATP synthase subunit alpha OS=Gallus gallus GN=ATP5A1W PE=3 SV=2	176	59991	33.5	5374	1	1	1	4467492	0
[truncated: 1,888 more rows]
