# Supplementary material for: Scleral ossicles: angiogenic scaffolds, a novel biomaterial for regenerative medicine applications
Source: Royal Society of Chemistry journal article supplement (doi:10.1039/c9bm01234f), 2019-11-06
Supplement: c9bm01234f2.xlsx [file c9bm01234f2.xlsx]

## Sheet: ___data_20190722_F004225_dat_rf
Supplementary Material 2
User,MChecchi
E-mail,marta.checchi@unimore.it
Search title,2019.07.22_List2-paper
MS data file,20190514_SO_Angio_20190308_02.mgf
Database 1,"cRAP 20120229 (116 sequences	38,202 residues)"
Database 2,"Trembl 20160330 (63,039,659 sequences	21,078,249,719 residues)"
Taxonomy 1,(none)
Taxonomy 2,"Gallus Gallus (21,908 sequences)"
Timestamp,"22 Jul 2019 at 14:07:39 GMT"
Type of search,"MS/MS Ion Search"
Quantitation,None
Enzyme,Trypsin
Variable modifications,"Deamidated (NQ),Oxidation (M)"
Mass values,Monoisotopic
Protein mass,Unrestricted
Peptide mass tolerance,"10 ppm"
Fragment mass tolerance,"0.01 Da"
Max missed cleavages,1
Instrument type,Default
Number of queries,"16,338"
Warning,"No taxonomy indexes for cRAP, taxonomy 'Gallus Gallus' ignored. Searching all entries in cRAP"
Significance threshold p<,0.00055
Max. number of families,AUTO
Ions score or expect cut-off,0
Preferred taxonomy,"All entries"
Show Percolator scores?,no
Family	Member	Database	Accession	Score	Mass	Num. of matches	Num. of significant matches	Num. of sequences	Num. of significant sequences	emPAI	Description
1	1	Trembl	F1NX22_CHICK	1918	339594	287	118	102	62	1.06	Collagen alpha-1(XII) chain OS=Gallus gallus GN=COL12A1 PE=4 SV=2
2	1	Trembl	F1P2F0_CHICK	1309	339408	206	83	90	46	0.77	Collagen alpha-3(VI) chain OS=Gallus gallus GN=COL6A3 PE=4 SV=1
3	1	Trembl	E1BRE9_CHICK	977	39603	124	55	18	9	2.35	Decorin OS=Gallus gallus GN=DCN PE=4 SV=2
4	1	Trembl	F1NCD4_CHICK	624	226497	115	39	65	25	0.48	Myosin-9 OS=Gallus gallus GN=MYH9 PE=4 SV=2
4	2	Trembl	Q02015_CHICK	307	231322	57	20	37	15	0.24	Nonmuscle myosin heavy chain OS=Gallus gallus PE=2 SV=2
5	1	Trembl	F1NJ08_CHICK	519	53183	89	31	31	16	2.07	Vimentin OS=Gallus gallus GN=VIM PE=3 SV=1
5	2	Trembl	Q49MC0_CHICK	270	30035	54	15	19	9	2.05	Vimentin (Fragment) OS=Gallus gallus GN=vimentin PE=3 SV=1
5	3	cRAP	sp|K2C1_HUMAN|	193	65847	27	10	19	7	0.35	sp|K2C1_HUMAN|
6	1	Trembl	G1K342_CHICK	330	43481	33	14	11	4	0.68	Uncharacterized protein (Fragment) OS=Gallus gallus PE=3 SV=2
6	2	Trembl	F1NYB1_CHICK	292	49829	28	11	13	4	0.49	Uncharacterized protein OS=Gallus gallus GN=TUBB4B PE=3 SV=2
7	1	Trembl	R4GKA6_CHICK	318	102432	43	19	20	11	0.48	Collagen alpha-2(VI) chain OS=Gallus gallus GN=COL6A2 PE=4 SV=1
8	1	Trembl	F1P476_CHICK	309	41982	46	10	13	4	0.50	Actin, gamma-enteric smooth muscle OS=Gallus gallus GN=ACTG2 PE=3 SV=2
8	2	Trembl	Q5ZLX9_CHICK	79	23260	35	4	11	3	0.61	Uncharacterized protein OS=Gallus gallus GN=RCJMB04_4h19 PE=2 SV=1
9	1	Trembl	F1NFE0_CHICK	304	107901	43	11	19	6	0.30	Collagen alpha-1(VI) chain OS=Gallus gallus GN=COL6A1 PE=4 SV=2
10	1	Trembl	F1P360_CHICK	269	56788	34	13	22	10	0.91	Uncharacterized protein OS=Gallus gallus GN=CKAP4 PE=4 SV=2
11	1	Trembl	F1P0H9_CHICK	266	128843	63	26	22	12	0.37	Collagen alpha-2(I) chain OS=Gallus gallus GN=COL1A2 PE=4 SV=1
12	1	Trembl	E1C7H6_CHICK	253	47052	32	11	17	7	0.72	Uncharacterized protein OS=Gallus gallus GN=SERPINF1 PE=3 SV=1
13	1	Trembl	F1N9S7_CHICK	250	38532	24	13	8	4	0.67	Annexin OS=Gallus gallus GN=ANXA1 PE=3 SV=1
14	1	Trembl	A0A0A0MQ64_CHICK	234	15869	36	11	7	3	2.93	Histone H2B (Fragment) OS=Gallus gallus GN=HIST1H2B5L PE=3 SV=1
15	1	Trembl	F1N8F4_CHICK	215	198791	61	15	33	11	0.22	Tenascin OS=Gallus gallus GN=TNC PE=4 SV=1
16	1	Trembl	F1P494_CHICK	196	70357	43	11	19	7	0.44	Uncharacterized protein (Fragment) OS=Gallus gallus GN=TGFBI PE=4 SV=2
17	1	Trembl	E1BT96_CHICK	192	42100	40	12	13	5	0.50	Uncharacterized protein OS=Gallus gallus GN=ASPN PE=4 SV=2
18	1	Trembl	E1C7T4_CHICK	186	42946	49	15	12	7	0.93	Uncharacterized protein OS=Gallus gallus GN=PRELP PE=4 SV=1
19	1	Trembl	F1NW23_CHICK	182	189912	29	12	23	11	0.20	Uncharacterized protein (Fragment) OS=Gallus gallus GN=CLTC PE=4 SV=1
20	1	Trembl	Q5ZKM2_CHICK	166	50107	26	10	12	4	0.40	Elongation factor 1-alpha OS=Gallus gallus GN=RCJMB04_10b5 PE=2 SV=1
21	1	Trembl	R9PXN4_CHICK	154	101841	53	13	31	9	0.40	Alpha-actinin-1 (Fragment) OS=Gallus gallus GN=ACTN1 PE=4 SV=1
21	2	Trembl	H9L0H3_CHICK	61	71578	21	5	14	4	0.17	Alpha-actinin-4 (Fragment) OS=Gallus gallus GN=ACTN4 PE=4 SV=2
22	1	Trembl	F1NGA2_CHICK	150	59991	16	7	12	6	0.39	ATP synthase subunit alpha OS=Gallus gallus GN=ATP5A1W PE=3 SV=2
23	1	Trembl	F1NLZ4_CHICK	137	43826	11	6	3	1	0.21	Fibromodulin OS=Gallus gallus GN=FMOD PE=4 SV=1
24	1	Trembl	F1NU40_CHICK	122	75354	11	5	10	5	0.21	Nucleolin OS=Gallus gallus GN=NCL PE=4 SV=2
25	1	Trembl	F1NAT8_CHICK	120	40642	33	9	11	4	0.41	Uncharacterized protein OS=Gallus gallus GN=CHAD PE=4 SV=2
26	1	Trembl	F1NH87_CHICK	118	34897	36	5	13	3	0.38	Glyceraldehyde-3-phosphate dehydrogenase (Fragment) OS=Gallus gallus GN=GAPDH PE=3 SV=1
27	1	Trembl	Q6B834_CHICK	115	4913	8	5	2	2	1.67	Histone H4 (Fragment) OS=Gallus gallus PE=3 SV=1
28	1	Trembl	F1NJI0_CHICK	110	36186	25	12	18	8	0.86	Annexin (Fragment) OS=Gallus gallus GN=ANXA5 PE=3 SV=1
28	2	Trembl	E1BWX1_CHICK	104	86940	19	6	12	4	0.18	Annexin OS=Gallus gallus GN=ANXA6 PE=3 SV=2
29	1	Trembl	E1C459_CHICK	109	118746	27	7	20	6	0.16	Uncharacterized protein OS=Gallus gallus GN=MYO1D PE=4 SV=2
30	1	Trembl	F1N9J7_CHICK	107	50028	28	6	12	5	0.40	Uncharacterized protein OS=Gallus gallus GN=LOC425049 PE=3 SV=1
30	2	Trembl	F1NXR6_CHICK	88	51010	31	9	12	4	0.25	Uncharacterized protein OS=Gallus gallus GN=LOC100857858 PE=3 SV=2
30	3	Trembl	F1NW97_CHICK	60	52160	21	3	10	3	0.18	Uncharacterized protein OS=Gallus gallus GN=LOC100857858 PE=3 SV=2
31	1	Trembl	Q5ZI39_CHICK	105	70779	12	6	8	5	0.22	Uncharacterized protein OS=Gallus gallus GN=PLS3 PE=2 SV=1
32	1	Trembl	F1NY82_CHICK	97	159527	14	3	11	2	0.06	Uncharacterized protein OS=Gallus gallus GN=IQGAP1 PE=4 SV=2
33	1	Trembl	F1P2H5_CHICK	96	8805	5	3	2	1	0.81	Collagen alpha-1(I) chain (Fragment) OS=Gallus gallus GN=COL1A1 PE=4 SV=2
34	1	Trembl	E1C7A7_CHICK	94	51618	12	2	4	1	0.06	Uncharacterized protein OS=Gallus gallus GN=VTN PE=4 SV=2
35	1	Trembl	Q9DDD4_CHICK	93	22158	8	5	4	3	0.65	Tetranectin OS=Gallus gallus GN=CLEC3B PE=2 SV=1
36	1	Trembl	F1N8D4_CHICK	93	276967	21	4	15	3	0.04	Uncharacterized protein OS=Gallus gallus GN=FLNB PE=4 SV=2
37	1	Trembl	F1NSY1_CHICK	92	112015	11	1	9	1	0.03	Sodium/potassium-transporting ATPase subunit alpha (Fragment) OS=Gallus gallus GN=ATP1A1 PE=3 SV=2
38	1	Trembl	F6R347_CHICK	89	17281	5	2	2	1	0.17	Uncharacterized protein OS=Gallus gallus GN=RPL14 PE=4 SV=1
39	1	Trembl	F1P4U3_CHICK	89	21658	4	3	2	1	0.29	Secreted phosphoprotein 24 OS=Gallus gallus GN=SPP2 PE=4 SV=1
40	1	Trembl	F1NZ78_CHICK	88	47303	12	6	7	5	0.35	Alpha-enolase OS=Gallus gallus GN=ENO1 PE=3 SV=2
41	1	Trembl	Q90WF1_CHICK	84	272780	29	7	24	7	0.08	Filamin OS=Gallus gallus PE=2 SV=1
42	1	Trembl	F1NKF3_CHICK	84	85822	34	7	18	5	0.22	Uncharacterized protein OS=Gallus gallus GN=GSN PE=4 SV=1
43	1	Trembl	Q92069_CHICK	82	13932	13	4	4	2	0.47	Histone H2A OS=Gallus gallus GN=HIST1H2A4 PE=3 SV=2
43	2	Trembl	F2Z4M5_CHICK	58	12013	8	2	3	2	0.56	Histone H2A OS=Gallus gallus GN=H2AFV PE=3 SV=2
44	1	Trembl	Q5ZLJ7_CHICK	80	28744	10	3	7	3	0.34	Uncharacterized protein OS=Gallus gallus GN=RCJMB04_5n23 PE=2 SV=1
45	1	Trembl	E1C3D2_CHICK	79	41612	5	2	4	2	0.15	Septin-2 OS=Gallus gallus GN=SEPT2 PE=3 SV=1
46	1	Trembl	E1BUZ5_CHICK	77	14158	4	1	4	1	0.21	Uncharacterized protein (Fragment) OS=Gallus gallus GN=RPLP2 PE=3 SV=2
47	1	Trembl	F1NRP8_CHICK	77	846184	19	1	14	1		Uncharacterized protein OS=Gallus gallus GN=Gga.55200 PE=4 SV=2
48	1	Trembl	B3VHV2_CHICK	76	69803	6	2	5	2	0.09	Heat shock protein 70 OS=Gallus gallus GN=HSP70 PE=2 SV=1
49	1	Trembl	F1NJT3_CHICK	75	273077	19	3	18	3	0.03	Fibronectin OS=Gallus gallus GN=FN1 PE=4 SV=1
50	1	Trembl	F1NPA9_CHICK	74	26702	9	2	7	2	0.23	Uncharacterized protein OS=Gallus gallus GN=RPS3 PE=3 SV=2
51	1	Trembl	E1C8Z0_CHICK	74	68811	8	4	5	3	0.18	Dolichyl-diphosphooligosaccharide--protein glycosyltransferase subunit 2 OS=Gallus gallus GN=RPN2 PE=4 SV=2
52	1	Trembl	F1P4N9_CHICK	73	94146	18	3	13	2	0.10	Uncharacterized protein OS=Gallus gallus GN=POSTN PE=4 SV=1
53	1	Trembl	F1NWB7_CHICK	73	91499	7	2	7	2	0.06	Endoplasmin OS=Gallus gallus GN=HSP90B1 PE=3 SV=1
54	1	cRAP	sp|K1C10_HUMAN|	72	59483	18	4	15	3	0.21	sp|K1C10_HUMAN|
55	1	Trembl	E1BZE6_CHICK	72	40830	7	2	6	2	0.15	Uncharacterized protein OS=Gallus gallus GN=LOC100859627 PE=4 SV=2
56	1	Trembl	E1C3A9_CHICK	72	141509	14	1	10	1	0.02	Vigilin OS=Gallus gallus GN=HDLBP PE=4 SV=1
57	1	Trembl	Q5ZJD6_CHICK	71	17260	12	5	6	5	1.21	Uncharacterized protein OS=Gallus gallus GN=RCJMB04_19c7 PE=2 SV=1
58	1	Trembl	F1NSP8_CHICK	71	74947	8	2	6	1	0.08	Uncharacterized protein OS=Gallus gallus GN=HNRNPU PE=4 SV=2
59	1	Trembl	F7BYQ2_CHICK	70	33903	7	3	4	2	0.18	40S ribosomal protein S6 OS=Gallus gallus GN=RPS6 PE=4 SV=1
60	1	Trembl	F1NP51_CHICK	70	67897	15	2	12	2	0.09	Lamin-B2 OS=Gallus gallus GN=LMNB2 PE=3 SV=1
61	1	Trembl	E1BRC1_CHICK	70	18187	2	1	1	1	0.16	Uncharacterized protein OS=Gallus gallus GN=CD99 PE=4 SV=1
62	1	Trembl	Q90838_CHICK	69	41286	1	1	1	1	0.07	Leucine zipper protein OS=Gallus gallus GN=PTRF PE=2 SV=1
63	1	Trembl	F1P0J8_CHICK	67	129473	6	2	4	1	0.02	Uncharacterized protein OS=Gallus gallus GN=THBS1 PE=4 SV=2
64	1	Trembl	E1BTT8_CHICK	67	36479	8	2	7	1	0.17	L-lactate dehydrogenase OS=Gallus gallus GN=LDHA PE=3 SV=2
65	1	Trembl	F1NVA4_CHICK	66	30334	3	1	3	1	0.10	Nucleophosmin (Fragment) OS=Gallus gallus GN=NPM1 PE=4 SV=2
66	1	Trembl	F1NG39_CHICK	65	118803	13	1	8	1	0.02	Unconventional myosin-Ic OS=Gallus gallus GN=MYO1C PE=4 SV=1
67	1	Trembl	Q9PSD2_CHICK	65	1862	3	2	1	1	1.72	60 kDa NON-COLLAGENOUS phosphoprotein (Fragment) OS=Gallus gallus PE=4 SV=1
68	1	Trembl	Z4YJB8_CHICK	65	18388	5	2	3	2	0.35	Destrin (Fragment) OS=Gallus gallus GN=DSTN PE=4 SV=1
69	1	Trembl	R9PXN1_CHICK	63	43523	7	1	2	1	0.07	Eukaryotic initiation factor 4A-II OS=Gallus gallus GN=EIF4A2 PE=3 SV=1
70	1	Trembl	H9KZ88_CHICK	62	39031	6	1	6	1	0.07	Guanine nucleotide-binding protein G(i) subunit alpha-2 (Fragment) OS=Gallus gallus GN=GNAI2 PE=4 SV=2
71	1	Trembl	F1NB02_CHICK	62	24170	6	2	4	1	0.26	40S ribosomal protein S8 OS=Gallus gallus GN=RPS8 PE=3 SV=2
72	1	Trembl	F1NXW3_CHICK	61	17325	2	1	2	1	0.17	Uncharacterized protein (Fragment) OS=Gallus gallus GN=RPS15A PE=3 SV=2
73	1	Trembl	F1P4F4_CHICK	61	32152	3	1	2	1	0.09	Uncharacterized protein OS=Gallus gallus GN=SSR1 PE=4 SV=1
74	1	Trembl	F1N8H6_CHICK	60	61814	5	2	4	2	0.10	Heterochromatin protein 1-binding protein 3 OS=Gallus gallus GN=HP1BP3 PE=3 SV=1
75	1	Trembl	F1NV15_CHICK	60	35356	2	1	2	1	0.08	Sideroflexin OS=Gallus gallus GN=SFXN3 PE=3 SV=2
76	1	Trembl	F1NEG6_CHICK	60	56530	9	1	7	1	0.05	Uncharacterized protein OS=Gallus gallus GN=HNRNPH1 PE=4 SV=2
77	1	Trembl	R4GFR3_CHICK	58	346958	4	2	4	2	0.02	Uncharacterized protein (Fragment) OS=Gallus gallus PE=4 SV=1
78	1	Trembl	F1NIX2_CHICK	58	72599	4	2	4	2	0.08	Uncharacterized protein OS=Gallus gallus GN=DDX3X PE=3 SV=2
79	1	Trembl	E1BY44_CHICK	58	77703	3	1	2	1	0.04	Uncharacterized protein (Fragment) OS=Gallus gallus GN=TGM2 PE=4 SV=2
80	1	Trembl	Q6EE60_CHICK	58	18838	5	1	4	1	0.16	Ribosomal protein L18 (Fragment) OS=Gallus gallus PE=2 SV=1
81	1	Trembl	Q5G8Y9_CHICK	58	21691	8	2	4	1	0.14	Apolipoprotein D OS=Gallus gallus GN=ApoD PE=2 SV=1
82	1	Trembl	Q6QIF4_CHICK	58	25048	3	1	3	1	0.12	Beta B2-crystallin long isoform OS=Gallus gallus PE=2 SV=1
83	1	Trembl	F1NBX4_CHICK	58	16798	2	1	1	1	0.18	Uncharacterized protein OS=Gallus gallus GN=RPL27A PE=3 SV=2
84	1	Trembl	E1C272_CHICK	57	44702	1	1	1	1	0.07	Uncharacterized protein OS=Gallus gallus PE=4 SV=1
85	1	Trembl	R4GJT7_CHICK	56	59154	14	2	9	2	0.10	Uncharacterized protein OS=Gallus gallus PE=4 SV=1
86	1	Trembl	E1BV34_CHICK	56	68514	7	1	7	1	0.04	Uncharacterized protein OS=Gallus gallus GN=Gga.3145 PE=4 SV=1
87	1	Trembl	Q5ZME1_CHICK	56	36962	3	2	2	2	0.16	Uncharacterized protein OS=Gallus gallus GN=HNRNPA2B1 PE=2 SV=1
88	1	Trembl	E1C6R9_CHICK	56	19871	9	2	4	2	0.32	Uncharacterized protein OS=Gallus gallus GN=LOC770011 PE=4 SV=2
89	1	Trembl	Q71SG1_CHICK	56	62220	7	2	6	2	0.10	Collapsin response mediator protein-2B OS=Gallus gallus GN=CRMP2B PE=2 SV=1
90	1	Trembl	E1BRL9_CHICK	54	28161	8	1	4	1	0.10	Uncharacterized protein OS=Gallus gallus GN=SRSF7 PE=4 SV=2
91	1	Trembl	E1BY12_CHICK	54	105656	7	2	5	2	0.06	AP complex subunit beta OS=Gallus gallus GN=AP2B1 PE=3 SV=1
92	1	Trembl	F1NEB4_CHICK	54	133175	7	1	6	1	0.02	Protein transport protein Sec31A OS=Gallus gallus GN=SEC31A PE=4 SV=2
93	1	Trembl	F2Z4L4_CHICK	54	32084	6	2	5	2	0.19	Uncharacterized protein OS=Gallus gallus GN=SET PE=3 SV=1
94	1	Trembl	Q5ZJZ2_CHICK	54	46057	6	2	5	2	0.13	Uncharacterized protein OS=Gallus gallus GN=RPL3 PE=2 SV=1
95	1	Trembl	Q9PSR0_CHICK	53	4772	3	2	2	1	0.65	Annexin II=36 kDa matrix vesicles annexin OS=Gallus gallus PE=4 SV=1
96	1	Trembl	F2Z4K7_CHICK	53	29848	3	2	2	1	0.21	40S ribosomal protein S3a OS=Gallus gallus GN=RPS3A PE=3 SV=1
97	1	cRAP	sp|TRYP_PIG|	52	24394	6	3	1	1	0.12	sp|TRYP_PIG|
98	1	Trembl	R4GM10_CHICK	52	39336	7	2	3	2	0.15	Fructose-bisphosphate aldolase OS=Gallus gallus GN=ALDOC PE=3 SV=1
99	1	Trembl	F1NU17_CHICK	51	44638	15	2	12	2	0.14	Phosphoglycerate kinase OS=Gallus gallus GN=PGK1 PE=3 SV=1
100	1	Trembl	Q5ZL82_CHICK	51	50437	7	1	5	1	0.06	Isocitrate dehydrogenase [NADP] OS=Gallus gallus GN=RCJMB04_7e11 PE=2 SV=1
101	1	Trembl	Q5F422_CHICK	51	42138	3	1	3	1	0.07	Uncharacterized protein OS=Gallus gallus GN=DEK PE=2 SV=1
102	1	Trembl	F1N822_CHICK	51	62113	19	2	10	2	0.10	Uncharacterized protein OS=Gallus gallus GN=LRRC15 PE=4 SV=2
103	1	cRAP	sp|K1C9_HUMAN|	50	62092	12	3	8	2	0.10	sp|K1C9_HUMAN|
104	1	Trembl	E1C0F1_CHICK	50	60630	22	1	9	1	0.05	Dolichyl-diphosphooligosaccharide--protein glycosyltransferase subunit 1 (Fragment) OS=Gallus gallus GN=RPN1 PE=3 SV=2
105	1	Trembl	Q5ZKR9_CHICK	50	20516	7	1	4	1	0.14	Uncharacterized protein OS=Gallus gallus GN=RCJMB04_9i5 PE=2 SV=1
106	1	Trembl	F1NTJ5_CHICK	49	131986	23	3	18	3	0.07	Uncharacterized protein OS=Gallus gallus GN=MYO1B PE=4 SV=2
107	1	Trembl	E1C3Y5_CHICK	49	86131	4	1	2	1	0.03	Protein transport protein Sec23A OS=Gallus gallus GN=SEC23A PE=4 SV=1
108	1	Trembl	E1BUA1_CHICK	48	107413	2	1	2	1	0.03	Uncharacterized protein OS=Gallus gallus GN=Gga.55707 PE=4 SV=2
109	1	Trembl	F1NS91_CHICK	48	21822	5	1	4	1	0.13	Uncharacterized protein OS=Gallus gallus GN=RPL9 PE=4 SV=2
110	1	Trembl	E1C270_CHICK	47	40440	5	1	5	1	0.07	Uncharacterized protein OS=Gallus gallus PE=4 SV=1
111	1	Trembl	D0EKR3_CHICK	47	17799	6	1	4	1	0.17	Peptidyl-prolyl cis-trans isomerase OS=Gallus gallus PE=2 SV=1
112	1	Trembl	Q6EE32_CHICK	47	46851	8	1	6	1	0.06	Calreticulin (Fragment) OS=Gallus gallus PE=2 SV=1
113	1	Trembl	F1NK96_CHICK	47	48757	3	1	2	1	0.06	Uncharacterized protein OS=Gallus gallus GN=PDIA6 PE=3 SV=1
114	1	Trembl	Q5ZII1_CHICK	47	46721	11	2	6	1	0.13	Uncharacterized protein OS=Gallus gallus GN=RPL4 PE=2 SV=1
115	1	Trembl	Q9YGP0_CHICK	46	51316	9	2	7	2	0.12	Clusterin OS=Gallus gallus PE=2 SV=1
116	1	Trembl	E1BTG1_CHICK	46	17727	3	1	3	1	0.17	Uncharacterized protein OS=Gallus gallus GN=RPL12 PE=3 SV=2
117	1	Trembl	E1C2A1_CHICK	46	32151	9	1	6	1	0.09	Uncharacterized protein OS=Gallus gallus GN=ANP32A PE=4 SV=2
118	1	Trembl	F1NZ30_CHICK	46	40178	8	2	6	2	0.15	Creatine kinase B-type OS=Gallus gallus GN=CKB PE=3 SV=2
119	1	Trembl	F1NQG5_CHICK	46	24117	2	1	2	1	0.12	Ribosomal protein L15 OS=Gallus gallus GN=RPL15 PE=3 SV=2
120	1	Trembl	Q5ZMU9_CHICK	45	89269	8	1	7	1	0.03	Uncharacterized protein OS=Gallus gallus GN=VCP PE=2 SV=1
121	1	Trembl	E1C4Y1_CHICK	45	45981	6	1	5	1	0.06	Pannexin OS=Gallus gallus GN=PANX3 PE=3 SV=2
122	1	Trembl	E1BZG4_CHICK	45	76081	1	1	1	1	0.04	Uncharacterized protein OS=Gallus gallus GN=EEF1D PE=3 SV=2
123	1	Trembl	R4GH26_CHICK	45	62314	2	1	2	1	0.05	Uncharacterized protein OS=Gallus gallus GN=FKBP10 PE=4 SV=1
124	1	Trembl	E1BRS4_CHICK	45	14318	3	1	2	1	0.21	Uncharacterized protein OS=Gallus gallus GN=IFITM5 PE=4 SV=1
125	1	Trembl	D5LPR1_CHICK	44	54138	4	1	4	1	0.05	Fascin OS=Gallus gallus GN=FSCN1 PE=2 SV=1
126	1	Trembl	F1N9H3_CHICK	44	55752	18	2	13	2	0.11	Protein disulfide-isomerase OS=Gallus gallus GN=P4HB PE=3 SV=2
127	1	Trembl	F1NG70_CHICK	44	257887	7	1	4	1	0.01	Uncharacterized protein OS=Gallus gallus GN=CSPG4 PE=4 SV=2
128	1	Trembl	F6UGI5_CHICK	44	22693	7	1	6	1	0.13	Uncharacterized protein OS=Gallus gallus GN=RAB1A PE=3 SV=1
129	1	Trembl	E1C2H4_CHICK	44	55940	3	1	2	1	0.05	Uncharacterized protein OS=Gallus gallus PE=4 SV=1
130	1	Trembl	Q8UWG7_CHICK	44	33902	11	1	7	1	0.09	60S ribosomal protein L6 OS=Gallus gallus GN=RPL6 PE=2 SV=1
131	1	Trembl	F1NZY9_CHICK	44	34067	3	1	3	1	0.09	NADH-cytochrome b5 reductase OS=Gallus gallus GN=CYB5R3 PE=3 SV=1
132	1	Trembl	H9L340_CHICK	44	52914	12	1	8	1	0.06	ATP synthase subunit beta (Fragment) OS=Gallus gallus GN=ATP5B PE=3 SV=2
133	1	Trembl	E1C4M0_CHICK	44	30654	8	1	5	1	0.10	Uncharacterized protein OS=Gallus gallus GN=RPS2 PE=3 SV=1
134	1	Trembl	E1BZE1_CHICK	44	37177	4	1	2	1	0.08	Uncharacterized protein OS=Gallus gallus GN=AHSG PE=4 SV=1
135	1	Trembl	F1P5V6_CHICK	44	21897	2	1	2	1	0.13	Uncharacterized protein OS=Gallus gallus GN=MYL3 PE=4 SV=1
136	1	Trembl	R4GFP0_CHICK	43	125176	16	1	11	1	0.02	Uncharacterized protein OS=Gallus gallus GN=TNN PE=4 SV=1
137	1	Trembl	E1C4H4_CHICK	43	65479	3	1	3	1	0.04	Uncharacterized protein OS=Gallus gallus GN=PODN PE=4 SV=2
138	1	Trembl	E1C7E9_CHICK	43	39678	3	1	3	1	0.07	Uncharacterized protein OS=Gallus gallus PE=4 SV=2
139	1	Trembl	F2Z4L6_CHICK	43	63962	11	2	8	1	0.09	Serum albumin OS=Gallus gallus GN=ALB PE=4 SV=2
140	1	Trembl	F1NIS2_CHICK	43	23301	3	1	2	1	0.13	Uncharacterized protein (Fragment) OS=Gallus gallus GN=TMEM119 PE=4 SV=2
141	1	Trembl	Q9YHD2_CHICK	42	84127	5	1	4	1	0.03	Nuclear calmodulin-binding protein (Fragment) OS=Gallus gallus GN=URP PE=2 SV=1
142	1	Trembl	F1NK75_CHICK	42	32766	6	1	5	1	0.09	Uncharacterized protein OS=Gallus gallus PE=3 SV=2
143	1	Trembl	F1NME1_CHICK	42	21818	7	2	4	2	0.29	Uncharacterized protein OS=Gallus gallus GN=HIST1H111R PE=3 SV=1
144	1	Trembl	R4GHS9_CHICK	42	18015	4	1	2	1	0.16	Uncharacterized protein OS=Gallus gallus GN=RPS26 PE=4 SV=1
145	1	Trembl	E1BW98_CHICK	41	37506	1	1	1	1	0.08	Uncharacterized protein OS=Gallus gallus GN=GNB4 PE=4 SV=2
146	1	Trembl	Q9I9D1_CHICK	41	30179	10	1	7	1	0.10	Uncharacterized protein OS=Gallus gallus GN=VDAC2 PE=2 SV=1
147	1	cRAP	sp|RS27A_HUMAN|	41	17953	9	2	5	1	0.36	sp|RS27A_HUMAN|
148	1	Trembl	F1NJ37_CHICK	41	20639	3	1	3	1	0.14	Uncharacterized protein OS=Gallus gallus GN=MYL4 PE=4 SV=2
149	1	Trembl	F1NG53_CHICK	41	21511	3	1	2	1	0.14	Uncharacterized protein (Fragment) OS=Gallus gallus GN=RPL17 PE=3 SV=2
150	1	Trembl	E1BVB0_CHICK	41	20356	1	1	1	1	0.15	Uncharacterized protein OS=Gallus gallus GN=ARL1 PE=3 SV=1
151	1	Trembl	F1NUV7_CHICK	41	45892	2	1	2	1	0.06	Uncharacterized protein OS=Gallus gallus GN=DMP1 PE=4 SV=2
152	1	Trembl	F1P3F1_CHICK	40	74355	1	1	1	1	0.04	Adenosylhomocysteinase OS=Gallus gallus GN=Gga.51956 PE=3 SV=2
153	1	Trembl	F1NFC6_CHICK	40	29445	4	1	4	1	0.10	Uncharacterized protein (Fragment) OS=Gallus gallus GN=RPS4X PE=3 SV=2
154	1	Trembl	E1C3L7_CHICK	39	87569	6	1	3	1	0.03	Uncharacterized protein OS=Gallus gallus PE=4 SV=2
155	1	Trembl	R4GJK4_CHICK	39	21203	2	1	1	1	0.14	Uncharacterized protein OS=Gallus gallus GN=SSR3 PE=4 SV=1
156	1	Trembl	E1C8Q3_CHICK	39	87848	4	1	3	1	0.03	Uncharacterized protein OS=Gallus gallus GN=ALDH18A1 PE=3 SV=2
157	1	Trembl	F1NLB3_CHICK	39	117185	3	1	3	1	0.02	Neural cell adhesion molecule 1 OS=Gallus gallus GN=NCAM1 PE=4 SV=2
158	1	Trembl	E1BR22_CHICK	38	79181	2	1	2	1	0.04	Calpain-2 catalytic subunit OS=Gallus gallus GN=CAPN2 PE=4 SV=1
159	1	Trembl	F1NXV6_CHICK	38	69063	8	1	6	1	0.04	Prothrombin OS=Gallus gallus GN=F2 PE=3 SV=1
160	1	Trembl	F1NSM8_CHICK	37	29118	8	1	3	1	0.10	Osteopontin OS=Gallus gallus GN=SPP1 PE=4 SV=1
161	1	Trembl	F1NDP3_CHICK	37	87175	11	1	8	1	0.03	Uncharacterized protein (Fragment) OS=Gallus gallus GN=FAP PE=4 SV=2
162	1	Trembl	F1NFS0_CHICK	37	95168	14	1	8	1	0.03	Elongation factor 2 (Fragment) OS=Gallus gallus GN=EEF2 PE=4 SV=2
163	1	Trembl	O42134_CHICK	37	23900	4	1	2	1	0.12	Calpain small subunit (Fragment) OS=Gallus gallus PE=2 SV=1
164	1	Trembl	H9KZI4_CHICK	37	35991	4	1	2	1	0.08	Annexin OS=Gallus gallus GN=ANXA4 PE=3 SV=2
165	1	Trembl	Q5ZKK8_CHICK	37	23398	2	1	2	1	0.13	Ribosomal protein L19 OS=Gallus gallus GN=RCJMB04_10e3 PE=2 SV=1
166	1	Trembl	F1NKL4_CHICK	36	525454	24	1	22	1	0.01	Uncharacterized protein OS=Gallus gallus GN=DYNC1H1 PE=4 SV=2
167	1	Trembl	F2Z4K8_CHICK	36	16696	6	1	4	1	0.18	Calmodulin (Fragment) OS=Gallus gallus GN=CALM PE=4 SV=1
168	1	Trembl	E1BR88_CHICK	36	86534	7	1	6	1	0.03	Uncharacterized protein OS=Gallus gallus GN=PHEX PE=4 SV=2
169	1	Trembl	Q5F3D2_CHICK	36	36633	3	1	2	1	0.08	Uncharacterized protein OS=Gallus gallus GN=HNRNPH3 PE=2 SV=1
170	1	Trembl	E1C906_CHICK	36	216703	4	1	4	1	0.01	Uncharacterized protein OS=Gallus gallus GN=MYLK PE=4 SV=2
171	1	Trembl	R4GF52_CHICK	35	48671	6	1	3	1	0.06	Uncharacterized protein OS=Gallus gallus GN=OMD PE=4 SV=1
172	1	Trembl	R4GGJ0_CHICK	35	16403	6	1	4	1	0.18	Uncharacterized protein OS=Gallus gallus GN=RPS16 PE=3 SV=1
173	1	Trembl	F2Z4L5_CHICK	35	29850	1	1	1	1	0.10	60S ribosomal protein L7a (Fragment) OS=Gallus gallus GN=RPL7A PE=4 SV=1
174	1	Trembl	F1NB52_CHICK	35	97550	6	1	5	1	0.03	Coatomer subunit gamma OS=Gallus gallus GN=COPG1 PE=3 SV=1
175	1	Trembl	Q5ZM58_CHICK	35	42619	6	1	4	1	0.07	Uncharacterized protein OS=Gallus gallus GN=ACTR1A PE=2 SV=1
176	1	Trembl	F1NSA8_CHICK	34	21357	5	1	3	1	0.14	Uncharacterized protein (Fragment) OS=Gallus gallus GN=RAP1A PE=1 SV=1
177	1	Trembl	R4GJA9_CHICK	34	18964	1	1	1	1	0.16	Uncharacterized protein OS=Gallus gallus GN=EMP2 PE=4 SV=1
178	1	Trembl	Q5F346_CHICK	34	15873	3	1	3	1	0.19	Uncharacterized protein OS=Gallus gallus GN=RCJMB04_34p20 PE=2 SV=1
