# Supplementary material for: Scleral ossicles: angiogenic scaffolds, a novel biomaterial for regenerative medicine applications
Source: Royal Society of Chemistry journal article supplement (doi:10.1039/c9bm01234f), 2019-11-06
Supplement: c9bm01234f3.xlsx [file c9bm01234f3.xlsx]

## Sheet: 2019.07.22 List3-Trembl FDR FIL
User	MChecchi
E-mail,marta,checchi@unimore,it
Search title,"MS02_3h_Keks_3 Trembl"
MS data file,20190614_Mass2_2,mgf
Database 1,"cRAP 20120229 (116 sequences	38,202 residues)"
Database 2,"Trembl 20160330 (63,039,659 sequences	21,078,249,719 residues)"
Taxonomy 1,(none)
Taxonomy 2,"Gallus Gallus (21,908 sequences)"
Timestamp,"19 Jul 2019 at 15:08:53 GMT"
Type of search,"MS/MS Ion Search"
Quantitation,None
Enzyme,Trypsin
Variable modifications,"Deamidated (NQ),Oxidation (M)"
Mass values,Monoisotopic
Protein mass,Unrestricted
Peptide mass tolerance,"10 ppm"
Fragment mass tolerance,"0,01 Da"
Max missed cleavages,1
Instrument type,Default
Number of queries,"35,015"
Warning,"No taxonomy indexes for cRAP, taxonomy 'Gallus Gallus' ignored, Searching all entries in cRAP"
Significance threshold p<,0,00065
Max, number of families,AUTO
Ions score or expect cut-off,0
Preferred taxonomy,"All entries"
Show Percolator scores?,no
Family	Member	Database	Accession	Score	Mass	Num, of matches	Num, of significant matches	Num, of sequences	Num, of significant sequences	emPAI	Description
1	1	Trembl	F1NX22_CHICK	4518	339594	686	293	110	74	1.44	Collagen alpha-1(XII) chain OS=Gallus gallus GN=COL12A1 PE=4 SV=2
2	1	Trembl	F1P2F0_CHICK	3343	339408	500	192	103	58	0.99	Collagen alpha-3(VI) chain OS=Gallus gallus GN=COL6A3 PE=4 SV=1
3	1	Trembl	E1BRE9_CHICK	1818	39603	204	92	15	8	2.12	Decorin OS=Gallus gallus GN=DCN PE=4 SV=2
4	1	Trembl	Q789A6_CHICK	1240	228897	218	85	74	37	0.78	Nonmuscle myosin heavy chain OS=Gallus gallus GN=MYH10 PE=2 SV=1
4	2	Trembl	F1NCD4_CHICK	1087	226497	249	72	76	32	0.68	Myosin-9 OS=Gallus gallus GN=MYH9 PE=4 SV=2
5	1	Trembl	F1NJ08_CHICK	879	53183	142	58	30	20	2.23	Vimentin OS=Gallus gallus GN=VIM PE=3 SV=1
6	1	Trembl	F1NFE0_CHICK	779	107901	102	33	22	8	0.41	Collagen alpha-1(VI) chain OS=Gallus gallus GN=COL6A1 PE=4 SV=2
7	1	Trembl	Q90824_CHICK	680	199178	146	40	33	14	0.37	Cytotactin 200kD OS=Gallus gallus PE=2 SV=1
7	2	Trembl	Q90994_CHICK	611	168525	134	36	31	12	0.36	Alternatively spliced tenascin 190, 200 and 230 kd variants OS=Gallus gallus PE=2 SV=1
8	1	Trembl	G1K342_CHICK	660	43481	74	31	10	4	0.68	Uncharacterized protein (Fragment) OS=Gallus gallus PE=3 SV=2
8	2	Trembl	F1NYB1_CHICK	441	49829	68	19	12	4	0.49	Uncharacterized protein OS=Gallus gallus GN=TUBB4B PE=3 SV=2
9	1	Trembl	F1P0H9_CHICK	656	128843	108	49	21	12	0.4	Collagen alpha-2(I) chain OS=Gallus gallus GN=COL1A2 PE=4 SV=1
10	1	Trembl	F1P476_CHICK	543	41982	97	27	13	7	0.83	Actin, gamma-enteric smooth muscle OS=Gallus gallus GN=ACTG2 PE=3 SV=2
10	2	Trembl	Q5ZLX9_CHICK	135	23260	58	13	9	4	0.81	Uncharacterized protein OS=Gallus gallus GN=RCJMB04_4h19 PE=2 SV=1
11	1	Trembl	R4GKA6_CHICK	478	102432	93	37	19	14	0.75	Collagen alpha-2(VI) chain OS=Gallus gallus GN=COL6A2 PE=4 SV=1
12	1	Trembl	E1C7T4_CHICK	384	42946	109	39	13	8	1.06	Uncharacterized protein OS=Gallus gallus GN=PRELP PE=4 SV=1
13	1	Trembl	F1P360_CHICK	359	56788	81	19	26	9	0.82	Uncharacterized protein OS=Gallus gallus GN=CKAP4 PE=4 SV=2
14	1	Trembl	E1BT96_CHICK	347	42100	75	22	13	5	0.5	Uncharacterized protein OS=Gallus gallus GN=ASPN PE=4 SV=2
15	1	Trembl	F1N9S7_CHICK	339	38532	35	12	6	4	0.55	Annexin OS=Gallus gallus GN=ANXA1 PE=3 SV=1
16	1	Trembl	Q90WF1_CHICK	336	272780	95	24	43	14	0.2	Filamin OS=Gallus gallus PE=2 SV=1
17	1	Trembl	R9PXN4_CHICK	325	101841	98	23	30	15	0.61	Alpha-actinin-1 (Fragment) OS=Gallus gallus GN=ACTN1 PE=4 SV=1
17	2	Trembl	H9L0H3_CHICK	192	71578	49	10	19	8	0.37	Alpha-actinin-4 (Fragment) OS=Gallus gallus GN=ACTN4 PE=4 SV=2
18	1	Trembl	F1NW23_CHICK	320	189912	68	21	31	16	0.27	Uncharacterized protein (Fragment) OS=Gallus gallus GN=CLTC PE=4 SV=1
19	1	Trembl	Q5ZKM2_CHICK	276	50107	52	19	12	6	0.49	Elongation factor 1-alpha OS=Gallus gallus GN=RCJMB04_10b5 PE=2 SV=1
20	1	Trembl	Q6B834_CHICK	262	4913	17	12	2	2	1.67	Histone H4 (Fragment) OS=Gallus gallus PE=3 SV=1
21	1	Trembl	F1NAT8_CHICK	254	40642	60	18	13	6	0.63	Uncharacterized protein OS=Gallus gallus GN=CHAD PE=4 SV=2
22	1	Trembl	F1NH87_CHICK	247	34897	62	17	13	5	0.91	Glyceraldehyde-3-phosphate dehydrogenase (Fragment) OS=Gallus gallus GN=GAPDH PE=3 SV=1
23	1	Trembl	E1BWX1_CHICK	245	86940	62	17	20	8	0.39	Annexin OS=Gallus gallus GN=ANXA6 PE=3 SV=2
23	2	Trembl	F1NJI0_CHICK	185	36186	22	8	12	4	0.36	Annexin (Fragment) OS=Gallus gallus GN=ANXA5 PE=3 SV=1
24	1	Trembl	F1P494_CHICK	244	70357	104	14	18	6	0.33	Uncharacterized protein (Fragment) OS=Gallus gallus GN=TGFBI PE=4 SV=2
25	1	Trembl	F1N9J7_CHICK	239	50028	69	19	13	9	0.76	Uncharacterized protein OS=Gallus gallus GN=LOC425049 PE=3 SV=1
25	2	Trembl	F1NXR6_CHICK	155	51010	78	15	12	8	0.56	Uncharacterized protein OS=Gallus gallus GN=LOC100857858 PE=3 SV=2
26	1	Trembl	E1C7H6_CHICK	239	47052	43	11	14	4	0.35	Uncharacterized protein OS=Gallus gallus GN=SERPINF1 PE=3 SV=1
27	1	Trembl	A0A0A0MQ64_CHICK	220	15869	42	16	7	2	0.98	Histone H2B (Fragment) OS=Gallus gallus GN=HIST1H2B5L PE=3 SV=1
28	1	Trembl	F1NLZ4_CHICK	188	43826	28	7	6	1	0.14	Fibromodulin OS=Gallus gallus GN=FMOD PE=4 SV=1
29	1	Trembl	F1N8W3_CHICK	184	96022	46	11	17	5	0.23	Uncharacterized protein OS=Gallus gallus GN=POSTN PE=4 SV=2
30	1	Trembl	F1NKF3_CHICK	165	85822	66	15	13	7	0.35	Uncharacterized protein OS=Gallus gallus GN=GSN PE=4 SV=1
31	1	Trembl	Q6EE60_CHICK	142	18838	12	4	5	2	0.34	Ribosomal protein L18 (Fragment) OS=Gallus gallus PE=2 SV=1
32	1	Trembl	F6R347_CHICK	114	17281	9	3	3	1	0.17	Uncharacterized protein OS=Gallus gallus GN=RPL14 PE=4 SV=1
33	1	Trembl	Q9PSD2_CHICK	112	1862	6	5	1	1	1.72	60 kDa NON-COLLAGENOUS phosphoprotein (Fragment) OS=Gallus gallus PE=4 SV=1
34	1	Trembl	E1BRK7_CHICK	109	40305	13	4	5	2	0.15	Uncharacterized protein OS=Gallus gallus GN=ANGPTL7 PE=4 SV=1
35	1	Trembl	F1NI22_CHICK	102	59862	42	6	15	4	0.27	ATP synthase subunit alpha OS=Gallus gallus GN=ATP5A1 PE=3 SV=1
36	1	Trembl	E1C459_CHICK	100	118746	51	12	23	7	0.18	Uncharacterized protein OS=Gallus gallus GN=MYO1D PE=4 SV=2
37	1	Trembl	Q6EE57_CHICK	94	21828	16	3	5	1	0.29	40S ribosomal protein S8 (Fragment) OS=Gallus gallus PE=2 SV=1
38	1	Trembl	E1C8Z0_CHICK	92	68811	17	5	5	3	0.13	Dolichyl-diphosphooligosaccharide--protein glycosyltransferase subunit 2 OS=Gallus gallus GN=RPN2 PE=4 SV=2
39	1	Trembl	F1NVA4_CHICK	91	30334	9	2	5	1	0.1	Nucleophosmin (Fragment) OS=Gallus gallus GN=NPM1 PE=4 SV=2
40	1	Trembl	F1NV15_CHICK	85	35356	7	1	3	1	0.08	Sideroflexin OS=Gallus gallus GN=SFXN3 PE=3 SV=2
41	1	Trembl	E1C6R9_CHICK	84	19871	21	2	8	1	0.15	Uncharacterized protein OS=Gallus gallus GN=LOC770011 PE=4 SV=2
42	1	Trembl	R4GFP0_CHICK	83	125176	27	3	14	3	0.07	Uncharacterized protein OS=Gallus gallus GN=TNN PE=4 SV=1
43	1	Trembl	F1NXW3_CHICK	83	17325	6	3	3	1	0.17	Uncharacterized protein (Fragment) OS=Gallus gallus GN=RPS15A PE=3 SV=2
45	1	Trembl	F2Z4K8_CHICK	78	16696	12	4	7	4	0.92	Calmodulin (Fragment) OS=Gallus gallus GN=CALM PE=4 SV=1
46	1	Trembl	Q9DDD4_CHICK	77	22158	20	4	5	2	0.45	Tetranectin OS=Gallus gallus GN=CLEC3B PE=2 SV=1
47	1	Trembl	H9L047_CHICK	76	28895	8	3	5	2	0.21	Acidic leucine-rich nuclear phosphoprotein 32 family member E OS=Gallus gallus GN=ANP32E PE=4 SV=2
48	1	Trembl	F1NIX2_CHICK	76	72599	13	3	6	2	0.08	Uncharacterized protein OS=Gallus gallus GN=DDX3X PE=3 SV=2
49	1	Trembl	F1NKZ3_CHICK	76	202614	21	3	12	3	0.04	Collagen alpha-1(XIV) chain OS=Gallus gallus GN=COL14A1 PE=4 SV=2
50	1	Trembl	H9L074_CHICK	75	35330	22	4	9	2	0.17	Uncharacterized protein OS=Gallus gallus PE=3 SV=2
50	2	Trembl	Q05705_CHICK	72	28655	15	4	5	2	0.22	Beta-tropomyosin OS=Gallus gallus GN=BRT-2 PE=2 SV=1
51	1	Trembl	E1BTT8_CHICK	73	36479	20	3	9	1	0.17	L-lactate dehydrogenase OS=Gallus gallus GN=LDHA PE=3 SV=2
52	1	Trembl	F1NSY1_CHICK	72	112015	20	2	11	2	0.05	Sodium/potassium-transporting ATPase subunit alpha (Fragment) OS=Gallus gallus GN=ATP1A1 PE=3 SV=2
53	1	Trembl	F1N8H6_CHICK	71	61814	12	3	6	2	0.15	Heterochromatin protein 1-binding protein 3 OS=Gallus gallus GN=HP1BP3 PE=3 SV=1
54	1	Trembl	F1NY82_CHICK	71	159527	32	3	16	3	0.06	Uncharacterized protein OS=Gallus gallus GN=IQGAP1 PE=4 SV=2
55	1	Trembl	F1NRP8_CHICK	71	846184	27	1	16	1		Uncharacterized protein OS=Gallus gallus GN=Gga,55200 PE=4 SV=2
56	1	Trembl	E1C3Y5_CHICK	70	86131	4	1	2	1	0.03	Protein transport protein Sec23A OS=Gallus gallus GN=SEC23A PE=4 SV=1
57	1	Trembl	Q5ZI39_CHICK	70	70779	22	5	10	4	0.17	Uncharacterized protein OS=Gallus gallus GN=PLS3 PE=2 SV=1
58	1	Trembl	E1C3D2_CHICK	70	41612	11	1	6	1	0.07	Septin-2 OS=Gallus gallus GN=SEPT2 PE=3 SV=1
59	1	Trembl	F1NP51_CHICK	67	67897	18	3	8	2	0.09	Lamin-B2 OS=Gallus gallus GN=LMNB2 PE=3 SV=1
60	1	Trembl	R4GM10_CHICK	68	39336	15	2	7	2	0.15	Fructose-bisphosphate aldolase OS=Gallus gallus GN=ALDOC PE=3 SV=1
62	1	Trembl	Q5ZKB0_CHICK	67	22587	6	3	2	1	0.28	Uncharacterized protein OS=Gallus gallus GN=TMED2 PE=2 SV=1
63	1	Trembl	F1NZY9_CHICK	67	34067	7	3	3	1	0.09	NADH-cytochrome b5 reductase OS=Gallus gallus GN=CYB5R3 PE=3 SV=1
64	1	Trembl	F1NPA9_CHICK	67	26702	15	3	7	2	0.23	Uncharacterized protein OS=Gallus gallus GN=RPS3 PE=3 SV=2
65	1	Trembl	Q90838_CHICK	66	41286	4	1	2	1	0.07	Leucine zipper protein OS=Gallus gallus GN=PTRF PE=2 SV=1
66	1	Trembl	F1NME1_CHICK	66	21818	9	6	3	2	0.46	Uncharacterized protein OS=Gallus gallus GN=HIST1H111R PE=3 SV=1
67	1	Trembl	Q5G8Y9_CHICK	66	21691	20	6	5	2	0.47	Apolipoprotein D OS=Gallus gallus GN=ApoD PE=2 SV=1
68	1	Trembl	Q71SG2_CHICK	65	73395	11	2	6	2	0.08	Collapsin response mediator protein-2A OS=Gallus gallus GN=CRMP2A PE=2 SV=1
69	1	Trembl	F1NJ37_CHICK	65	20639	4	1	1	1	0.14	Uncharacterized protein OS=Gallus gallus GN=MYL4 PE=4 SV=2
70	1	Trembl	F1NU17_CHICK	65	44638	23	4	9	3	0.21	Phosphoglycerate kinase OS=Gallus gallus GN=PGK1 PE=3 SV=1
71	1	Trembl	F1NJT3_CHICK	64	273077	44	5	20	4	0.04	Fibronectin OS=Gallus gallus GN=FN1 PE=4 SV=1
72	1	Trembl	E1BY12_CHICK	62	105656	3	1	2	1	0.03	AP complex subunit beta OS=Gallus gallus GN=AP2B1 PE=3 SV=1
73	1	Trembl	F1NLB3_CHICK	62	117185	17	2	10	2	0.05	Neural cell adhesion molecule 1 OS=Gallus gallus GN=NCAM1 PE=4 SV=2
74	1	Trembl	E1BRS4_CHICK	60	14318	6	3	2	2	0.46	Uncharacterized protein OS=Gallus gallus GN=IFITM5 PE=4 SV=1
75	1	Trembl	F1NSP8_CHICK	60	74947	8	1	4	1	0.04	Uncharacterized protein OS=Gallus gallus GN=HNRNPU PE=4 SV=2
76	1	Trembl	R4GJT7_CHICK	60	59154	13	2	7	1	0.05	Uncharacterized protein OS=Gallus gallus PE=4 SV=1
78	1	Trembl	E1BV71_CHICK	58	80185	5	1	3	1	0.04	Uncharacterized protein OS=Gallus gallus GN=ECM2 PE=4 SV=1
79	1	Trembl	F1NDN9_CHICK	58	46010	8	2	4	2	0.13	Keratin, type I cytoskeletal 19 OS=Gallus gallus GN=KRT19 PE=3 SV=1
80	1	Trembl	Q92069_CHICK	57	13932	24	5	3	1	0.21	Histone H2A OS=Gallus gallus GN=HIST1H2A4 PE=3 SV=2
82	1	Trembl	F1P0J8_CHICK	57	129473	11	2	6	1	0.02	Uncharacterized protein OS=Gallus gallus GN=THBS1 PE=4 SV=2
83	1	Trembl	Q5ZKR9_CHICK	56	20516	11	3	4	2	0.31	Uncharacterized protein OS=Gallus gallus GN=RCJMB04_9i5 PE=2 SV=1
84	1	Trembl	Q9PSR0_CHICK	56	4772	5	3	1	1	0.65	Annexin II=36 kDa matrix vesicles annexin OS=Gallus gallus PE=4 SV=1
85	1	Trembl	F1P2H5_CHICK	54	8805	7	3	2	2	1.43	Collagen alpha-1(I) chain (Fragment) OS=Gallus gallus GN=COL1A1 PE=4 SV=2
86	1	Trembl	E1C3A9_CHICK	53	141509	14	1	11	1	0.02	Vigilin OS=Gallus gallus GN=HDLBP PE=4 SV=1
87	1	Trembl	E1C7A7_CHICK	53	51618	15	4	4	2	0.18	Uncharacterized protein OS=Gallus gallus GN=VTN PE=4 SV=2
88	1	Trembl	F1NSM8_CHICK	53	29118	10	2	2	1	0.1	Osteopontin OS=Gallus gallus GN=SPP1 PE=4 SV=1
89	1	Trembl	D0EKR3_CHICK	53	17799	23	2	4	1	0.17	Peptidyl-prolyl cis-trans isomerase OS=Gallus gallus PE=2 SV=1
90	1	Trembl	F1NZ78_CHICK	52	47303	13	3	6	2	0.13	Alpha-enolase OS=Gallus gallus GN=ENO1 PE=3 SV=2
91	1	Trembl	Q5ZME1_CHICK	52	36962	3	1	1	1	0.08	Uncharacterized protein OS=Gallus gallus GN=HNRNPA2B1 PE=2 SV=1
92	1	Trembl	E1C906_CHICK	51	216703	9	2	7	2	0.03	Uncharacterized protein OS=Gallus gallus GN=MYLK PE=4 SV=2
93	1	Trembl	F7BYQ2_CHICK	51	33903	5	2	2	2	0.18	40S ribosomal protein S6 OS=Gallus gallus GN=RPS6 PE=4 SV=1
94	1	Trembl	E2IPN6_CHICK	51	16631	5	2	2	1	0.18	Prostaglandin E synthase OS=Gallus gallus GN=PTGES PE=2 SV=1
95	1	Trembl	Q5F354_CHICK	51	138464	27	3	16	3	0.06	Coatomer subunit alpha OS=Gallus gallus GN=RCJMB04_34d13 PE=2 SV=1
96	1	Trembl	Q5ZJ59_CHICK	50	40148	19	3	6	2	0.15	Uncharacterized protein OS=Gallus gallus GN=RCJMB04_20j14 PE=2 SV=1
97	1	Trembl	Q5F422_CHICK	50	42138	5	1	3	1	0.07	Uncharacterized protein OS=Gallus gallus GN=DEK PE=2 SV=1
98	1	Trembl	F1NYL7_CHICK	50	104603	7	1	4	1	0.03	Uncharacterized protein OS=Gallus gallus GN=TCEB3 PE=4 SV=2
99	1	Trembl	F1NI75_CHICK	50	398584	35	1	19	1	0.01	Uncharacterized protein OS=Gallus gallus GN=UTRN PE=4 SV=2
100	1	Trembl	F1NU40_CHICK	50	75354	12	1	6	1	0.04	Nucleolin OS=Gallus gallus GN=NCL PE=4 SV=2
101	1	Trembl	Q9IAU4_CHICK	50	184124	5	1	4	1	0.02	Alpha 1 (V) collagen OS=Gallus gallus PE=2 SV=1
102	1	Trembl	E1BTG1_CHICK	50	17727	2	1	1	1	0.17	Uncharacterized protein OS=Gallus gallus GN=RPL12 PE=3 SV=2
103	1	Trembl	R4GKF5_CHICK	50	23026	12	1	4	1	0.13	Uncharacterized protein OS=Gallus gallus GN=TMED4 PE=3 SV=1
104	1	Trembl	Q5ZL82_CHICK	50	50437	14	1	8	1	0.06	Isocitrate dehydrogenase [NADP] OS=Gallus gallus GN=RCJMB04_7e11 PE=2 SV=1
105	1	Trembl	F1NWX7_CHICK	49	10008	6	2	2	1	0.3	Uncharacterized protein OS=Gallus gallus GN=SEC61B PE=4 SV=2
106	1	Trembl	Q5ZJZ2_CHICK	49	46057	11	2	5	2	0.13	Uncharacterized protein OS=Gallus gallus GN=RPL3 PE=2 SV=1
107	1	Trembl	E1BQ45_CHICK	49	95934	17	1	11	1	0.03	Uncharacterized protein (Fragment) OS=Gallus gallus PE=4 SV=2
108	1	Trembl	F1P4F4_CHICK	48	32152	7	2	2	1	0.19	Uncharacterized protein OS=Gallus gallus GN=SSR1 PE=4 SV=1
109	1	Trembl	F2Z4L4_CHICK	48	32084	4	1	4	1	0.09	Uncharacterized protein OS=Gallus gallus GN=SET PE=3 SV=1
110	1	Trembl	R4GJK4_CHICK	48	21203	5	2	3	2	0.3	Uncharacterized protein OS=Gallus gallus GN=SSR3 PE=4 SV=1
111	1	Trembl	E1BZN6_CHICK	47	21470	2	1	1	1	0.14	Receptor expression-enhancing protein OS=Gallus gallus GN=REEP5 PE=3 SV=1
112	1	Trembl	F1NUL9_CHICK	47	54546	4	2	3	2	0.11	Fibrinogen beta chain OS=Gallus gallus GN=FGB PE=4 SV=2
113	1	Trembl	F1NKR8_CHICK	47	93723	9	1	2	1	0.03	Major vault protein OS=Gallus gallus GN=MVP PE=4 SV=2
114	1	Trembl	Z4YJB8_CHICK	47	18388	6	1	1	1	0.16	Destrin (Fragment) OS=Gallus gallus GN=DSTN PE=4 SV=1
115	1	Trembl	F1P5G8_CHICK	47	53905	3	1	1	1	0.05	Uncharacterized protein OS=Gallus gallus PE=4 SV=2
116	1	Trembl	R4GGM5_CHICK	47	25005	3	1	2	1	0.12	Uncharacterized protein OS=Gallus gallus GN=TMED7 PE=3 SV=1
117	1	Trembl	E1C080_CHICK	46	23586	6	1	3	1	0.12	Uncharacterized protein OS=Gallus gallus GN=RAB8B PE=3 SV=2
118	1	Trembl	F2Z4M5_CHICK	46	12013	10	1	2	1	0.25	Histone H2A OS=Gallus gallus GN=H2AFV PE=3 SV=2
119	1	Trembl	F1NSA8_CHICK	46	21357	9	1	3	1	0.14	Uncharacterized protein (Fragment) OS=Gallus gallus GN=RAP1A PE=1 SV=1
120	1	Trembl	F1NQW8_CHICK	46	20696	19	3	4	2	0.31	Serine/arginine-rich-splicing factor 1 (Fragment) OS=Gallus gallus GN=SRSF1 PE=4 SV=1
121	1	Trembl	E1C3L7_CHICK	46	87569	15	1	4	1	0.03	Uncharacterized protein OS=Gallus gallus PE=4 SV=2
122	1	Trembl	E1C272_CHICK	45	44702	6	1	2	1	0.07	Uncharacterized protein OS=Gallus gallus PE=4 SV=1
123	1	Trembl	F1NG02_CHICK	45	1012264	36	1	22	1		Uncharacterized protein OS=Gallus gallus GN=SYNE1 PE=4 SV=2
124	1	Trembl	R4GJ67_CHICK	45	29034	11	1	4	1	0.1	Uncharacterized protein OS=Gallus gallus PE=4 SV=1
125	1	Trembl	Q92068_CHICK	45	15379	32	2	4	1	0.2	Histone H3 OS=Gallus gallus PE=3 SV=1
126	1	Trembl	E1BRL9_CHICK	45	28161	7	1	2	1	0.1	Uncharacterized protein OS=Gallus gallus GN=SRSF7 PE=4 SV=2
127	1	Trembl	Q6QIF4_CHICK	45	25048	8	1	5	1	0.12	Beta B2-crystallin long isoform OS=Gallus gallus PE=2 SV=1
128	1	Trembl	F1NBP0_CHICK	44	104690	20	1	8	1	0.03	Uncharacterized protein OS=Gallus gallus GN=THBS4 PE=4 SV=1
129	1	Trembl	Q5ZHW8_CHICK	44	16263	1	1	1	1	0.18	Uncharacterized protein OS=Gallus gallus GN=RPS14 PE=2 SV=1
130	1	Trembl	F1NII7_CHICK	44	301142	16	1	8	1	0.01	Uncharacterized protein OS=Gallus gallus GN=FBN1 PE=4 SV=2
131	1	Trembl	E1BR88_CHICK	43	86534	14	1	7	1	0.03	Uncharacterized protein OS=Gallus gallus GN=PHEX PE=4 SV=2
132	1	Trembl	F1P376_CHICK	43	62110	3	1	3	1	0.05	Protein wntless homolog OS=Gallus gallus GN=WLS PE=4 SV=1
133	1	Trembl	F1NW06_CHICK	43	26184	8	1	2	1	0.11	Tetraspanin OS=Gallus gallus GN=CD81 PE=3 SV=2
134	1	Trembl	F1NB52_CHICK	43	97550	12	2	6	2	0.06	Coatomer subunit gamma OS=Gallus gallus GN=COPG1 PE=3 SV=1
135	1	Trembl	F1NVN4_CHICK	43	83249	13	1	9	1	0.03	Uncharacterized protein OS=Gallus gallus PE=4 SV=2
136	1	Trembl	E1BV34_CHICK	43	68514	12	2	7	1	0.04	Uncharacterized protein OS=Gallus gallus GN=Gga,3145 PE=4 SV=1
137	1	Trembl	E1BZE6_CHICK	43	40830	5	1	3	1	0.07	Uncharacterized protein OS=Gallus gallus GN=LOC100859627 PE=4 SV=2
138	1	Trembl	Q9I9D1_CHICK	42	30179	17	1	7	1	0.1	Uncharacterized protein OS=Gallus gallus GN=VDAC2 PE=2 SV=1
139	1	Trembl	F1NG39_CHICK	42	118803	14	2	8	2	0.05	Unconventional myosin-Ic OS=Gallus gallus GN=MYO1C PE=4 SV=1
140	1	Trembl	F1NNS1_CHICK	41	48735	8	3	3	2	0.12	Dolichyl-diphosphooligosaccharide--protein glycosyltransferase 48 kDa subunit OS=Gallus gallus GN=DDOST PE=3 SV=2
141	1	Trembl	F1NW48_CHICK	41	47645	3	2	2	1	0.06	Uncharacterized protein (Fragment) OS=Gallus gallus GN=ACTR3B PE=3 SV=1
142	1	Trembl	F1NWH9_CHICK	41	57679	2	1	2	1	0.05	Uncharacterized protein (Fragment) OS=Gallus gallus GN=CCT6A PE=3 SV=2
143	1	Trembl	F1NUV7_CHICK	41	45892	5	1	3	1	0.06	Uncharacterized protein OS=Gallus gallus GN=DMP1 PE=4 SV=2
144	1	Trembl	E1C4Y1_CHICK	40	45981	5	1	3	1	0.06	Pannexin OS=Gallus gallus GN=PANX3 PE=3 SV=2
145	1	Trembl	E1BW21_CHICK	40	234031	13	1	9	1	0.01	Uncharacterized protein OS=Gallus gallus GN=MYOF PE=4 SV=2
146	1	Trembl	F1N8D4_CHICK	40	276967	36	2	25	2	0.02	Uncharacterized protein OS=Gallus gallus GN=FLNB PE=4 SV=2
147	1	Trembl	Q5ZII1_CHICK	40	46721	22	1	8	1	0.06	Uncharacterized protein OS=Gallus gallus GN=RPL4 PE=2 SV=1
148	1	Trembl	E1C016_CHICK	40	103080	13	1	7	1	0.03	Uncharacterized protein OS=Gallus gallus GN=COPB2 PE=4 SV=1
149	1	Trembl	F1N9R8_CHICK	39	32035	1	1	1	1	0.09	Uncharacterized protein (Fragment) OS=Gallus gallus GN=NUCKS1 PE=4 SV=2
150	1	Trembl	B3VHV2_CHICK	39	69803	13	2	8	2	0.09	Heat shock protein 70 OS=Gallus gallus GN=HSP70 PE=2 SV=1
151	1	Trembl	Q9PS14_CHICK	39	2131	1	1	1	1	1.52	Puromycin-sensitive aminopeptidase isozyme I (Fragment) OS=Gallus gallus PE=1 SV=1
152	1	Trembl	F1P179_CHICK	39	179751	9	1	7	1	0.02	Uncharacterized protein OS=Gallus gallus GN=EPRS PE=3 SV=1
153	1	Trembl	F1NQG5_CHICK	39	24117	5	1	2	1	0.12	Ribosomal protein L15 OS=Gallus gallus GN=RPL15 PE=3 SV=2
154	1	Trembl	F1P4K9_CHICK	38	165694	3	1	3	1	0.02	Uncharacterized protein OS=Gallus gallus GN=COL11A1 PE=4 SV=2
155	1	Trembl	F1NC33_CHICK	38	83435	9	1	7	1	0.03	Heat shock cognate protein HSP 90-beta OS=Gallus gallus GN=HSP90AB1 PE=3 SV=1
156	1	Trembl	E1C0F1_CHICK	37	60630	27	1	9	1	0.05	Dolichyl-diphosphooligosaccharide--protein glycosyltransferase subunit 1 (Fragment) OS=Gallus gallus GN=RPN1 PE=3 SV=2
157	1	Trembl	F1NFC6_CHICK	37	29445	7	1	3	1	0.1	Uncharacterized protein (Fragment) OS=Gallus gallus GN=RPS4X PE=3 SV=2
158	1	Trembl	F1NBX4_CHICK	37	16798	4	1	2	1	0.18	Uncharacterized protein OS=Gallus gallus GN=RPL27A PE=3 SV=2
159	1	Trembl	E1C866_CHICK	37	108939	19	1	11	1	0.03	Uncharacterized protein OS=Gallus gallus GN=Gga,50010 PE=4 SV=2
160	1	Trembl	F1NDP3_CHICK	37	87175	17	1	8	1	0.03	Uncharacterized protein (Fragment) OS=Gallus gallus GN=FAP PE=4 SV=2
161	1	Trembl	F1NZ30_CHICK	37	40178	3	1	3	1	0.07	Creatine kinase B-type OS=Gallus gallus GN=CKB PE=3 SV=2
162	1	Trembl	F1NEW0_CHICK	36	56483	8	1	6	1	0.05	Uncharacterized protein OS=Gallus gallus GN=LMAN1 PE=4 SV=1
163	1	Trembl	F1NF89_CHICK	36	15634	3	1	1	1	0.19	40S ribosomal protein S24 OS=Gallus gallus GN=RPS24 PE=3 SV=2
164	1	Trembl	F1NSI8_CHICK	36	21274	3	1	1	1	0.14	Uncharacterized protein OS=Gallus gallus PE=4 SV=2
165	1	Trembl	E1C8M9_CHICK	36	68326	6	1	4	1	0.04	Uncharacterized protein OS=Gallus gallus GN=CANX PE=3 SV=2
166	1	Trembl	F2Z4K7_CHICK	36	29848	11	1	4	1	0.1	40S ribosomal protein S3a OS=Gallus gallus GN=RPS3A PE=3 SV=1
167	1	Trembl	F1N9H3_CHICK	36	55752	16	1	11	1	0.05	Protein disulfide-isomerase OS=Gallus gallus GN=P4HB PE=3 SV=2
168	1	Trembl	E1BRC1_CHICK	36	18187	3	1	1	1	0.16	Uncharacterized protein OS=Gallus gallus GN=CD99 PE=4 SV=1
169	1	Trembl	F1NTT2_CHICK	36	7836	1	1	1	1	0.38	Uncharacterized protein OS=Gallus gallus GN=RPS28 PE=3 SV=2
170	1	Trembl	E1C6J9_CHICK	36	18161	5	1	3	1	0.16	Thy-1 membrane glycoprotein OS=Gallus gallus GN=THY1 PE=4 SV=2
171	1	Trembl	F1NX60_CHICK	35	78116	6	1	3	1	0.04	Fibulin-1 OS=Gallus gallus GN=FBLN1 PE=3 SV=1
172	1	Trembl	F1NSI3_CHICK	35	16175	4	1	2	1	0.18	Uncharacterized protein OS=Gallus gallus GN=CYB5B PE=3 SV=1
173	1	Trembl	E1BV78_CHICK	35	49923	15	1	6	1	0.06	Uncharacterized protein OS=Gallus gallus GN=FGG PE=4 SV=2
174	1	Trembl	F1NTJ5_CHICK	35	131986	24	1	14	1	0.02	Uncharacterized protein OS=Gallus gallus GN=MYO1B PE=4 SV=2
175	1	Trembl	F1P5V6_CHICK	35	21897	4	1	2	1	0.13	Uncharacterized protein OS=Gallus gallus GN=MYL3 PE=4 SV=1
176	1	Trembl	F1P1A5_CHICK	35	68411	9	1	6	1	0.04	Uncharacterized protein OS=Gallus gallus GN=TKT PE=4 SV=2
177	1	Trembl	R4GGJ0_CHICK	34	16403	6	1	4	1	0.18	Uncharacterized protein OS=Gallus gallus GN=RPS16 PE=3 SV=1
178	1	Trembl	Q9YGP0_CHICK	34	51316	11	1	5	1	0.06	Clusterin OS=Gallus gallus PE=2 SV=1
179	1	Trembl	E1C3I7_CHICK	34	51802	11	1	5	1	0.06	Calcium/calmodulin-dependent protein kinase type II delta chain (Fragment) OS=Gallus gallus GN=CAMK2D PE=4 SV=2
180	1	Trembl	E1BUZ5_CHICK	34	14158	9	1	4	1	0.21	Uncharacterized protein (Fragment) OS=Gallus gallus GN=RPLP2 PE=3 SV=2
181	1	Trembl	Q9YHD2_CHICK	34	84127	12	1	5	1	0.03	Nuclear calmodulin-binding protein (Fragment) OS=Gallus gallus GN=URP PE=2 SV=1
182	1	Trembl	F1N9Z7_CHICK	33	56138	20	1	10	1	0.05	Succinyl-CoA:3-ketoacid-coenzyme A transferase OS=Gallus gallus GN=OXCT1 PE=3 SV=2
183	1	Trembl	Q9YH14_CHICK	33	8334	3	1	2	1	0.36	Progesterone receptor binding protein OS=Gallus gallus GN=rbf PE=2 SV=1
184	1	Trembl	F1NG53_CHICK	33	21511	9	1	4	1	0.14	Uncharacterized protein (Fragment) OS=Gallus gallus GN=RPL17 PE=3 SV=2
										49.52

## Sheet: emPAI normaliz
Supplementary Material 3
User	MChecchi
E-mail,marta,checchi@unimore,it
Search title,"MS02_3h_Keks_3 Trembl"
MS data file,20190614_Mass2_2,mgf
Database 1,"cRAP 20120229 (116 sequences	38,202 residues)"
Database 2,"Trembl 20160330 (63,039,659 sequences	21,078,249,719 residues)"
Taxonomy 1,(none)
Taxonomy 2,"Gallus Gallus (21,908 sequences)"
Timestamp,"19 Jul 2019 at 15:08:53 GMT"
Type of search,"MS/MS Ion Search"
Quantitation,None
Enzyme,Trypsin
Variable modifications,"Deamidated (NQ),Oxidation (M)"
Mass values,Monoisotopic
Protein mass,Unrestricted
Peptide mass tolerance,"10 ppm"
Fragment mass tolerance,"0,01 Da"
Max missed cleavages,1
Instrument type,Default
Number of queries,"35,015"
Warning,"No taxonomy indexes for cRAP, taxonomy 'Gallus Gallus' ignored, Searching all entries in cRAP"
Significance threshold p<,0,00065
Max, number of families,AUTO
Ions score or expect cut-off,0
Preferred taxonomy,"All entries"
Show Percolator scores?,no
Family	Member	Database	Accession	Score	Mass	Num, of matches	Num, of significant matches	Num, of sequences	Num, of significant sequences	emPAI	emPAI norm		Description
1	1	Trembl	F1NX22_CHICK	4518	339594	686	293	110	74	1.44	0.0290792		Collagen alpha-1(XII) chain OS=Gallus gallus GN=COL12A1 PE=4 SV=2
2	1	Trembl	F1P2F0_CHICK	3343	339408	500	192	103	58	0.99	0.0199919		Collagen alpha-3(VI) chain OS=Gallus gallus GN=COL6A3 PE=4 SV=1
3	1	Trembl	E1BRE9_CHICK	1818	39603	204	92	15	8	2.12	0.042811		Decorin OS=Gallus gallus GN=DCN PE=4 SV=2
4	1	Trembl	Q789A6_CHICK	1240	228897	218	85	74	37	0.78	0.0157512		Nonmuscle myosin heavy chain OS=Gallus gallus GN=MYH10 PE=2 SV=1
4	2	Trembl	F1NCD4_CHICK	1087	226497	249	72	76	32	0.68	0.0137318		Myosin-9 OS=Gallus gallus GN=MYH9 PE=4 SV=2
5	1	Trembl	F1NJ08_CHICK	879	53183	142	58	30	20	2.23	0.0450323		Vimentin OS=Gallus gallus GN=VIM PE=3 SV=1
6	1	Trembl	F1NFE0_CHICK	779	107901	102	33	22	8	0.41	0.00827948		Collagen alpha-1(VI) chain OS=Gallus gallus GN=COL6A1 PE=4 SV=2
7	1	Trembl	Q90824_CHICK	680	199178	146	40	33	14	0.37	0.00747173		Cytotactin 200kD OS=Gallus gallus PE=2 SV=1
7	2	Trembl	Q90994_CHICK	611	168525	134	36	31	12	0.36	0.00726979		Alternatively spliced tenascin 190, 200 and 230 kd variants OS=Gallus gallus PE=2 SV=1
8	1	Trembl	G1K342_CHICK	660	43481	74	31	10	4	0.68	0.0137318		Uncharacterized protein (Fragment) OS=Gallus gallus PE=3 SV=2
8	2	Trembl	F1NYB1_CHICK	441	49829	68	19	12	4	0.49	0.00989499		Uncharacterized protein OS=Gallus gallus GN=TUBB4B PE=3 SV=2
9	1	Trembl	F1P0H9_CHICK	656	128843	108	49	21	12	0.4	0.00807754		Collagen alpha-2(I) chain OS=Gallus gallus GN=COL1A2 PE=4 SV=1
10	1	Trembl	F1P476_CHICK	543	41982	97	27	13	7	0.83	0.0167609		Actin, gamma-enteric smooth muscle OS=Gallus gallus GN=ACTG2 PE=3 SV=2
10	2	Trembl	Q5ZLX9_CHICK	135	23260	58	13	9	4	0.81	0.016357		Uncharacterized protein OS=Gallus gallus GN=RCJMB04_4h19 PE=2 SV=1
11	1	Trembl	R4GKA6_CHICK	478	102432	93	37	19	14	0.75	0.0151454		Collagen alpha-2(VI) chain OS=Gallus gallus GN=COL6A2 PE=4 SV=1
12	1	Trembl	E1C7T4_CHICK	384	42946	109	39	13	8	1.06	0.0214055		Uncharacterized protein OS=Gallus gallus GN=PRELP PE=4 SV=1
13	1	Trembl	F1P360_CHICK	359	56788	81	19	26	9	0.82	0.016559		Uncharacterized protein OS=Gallus gallus GN=CKAP4 PE=4 SV=2
14	1	Trembl	E1BT96_CHICK	347	42100	75	22	13	5	0.5	0.0100969		Uncharacterized protein OS=Gallus gallus GN=ASPN PE=4 SV=2
15	1	Trembl	F1N9S7_CHICK	339	38532	35	12	6	4	0.55	0.0111066		Annexin OS=Gallus gallus GN=ANXA1 PE=3 SV=1
16	1	Trembl	Q90WF1_CHICK	336	272780	95	24	43	14	0.2	0.00403877		Filamin OS=Gallus gallus PE=2 SV=1
17	1	Trembl	R9PXN4_CHICK	325	101841	98	23	30	15	0.61	0.0123183		Alpha-actinin-1 (Fragment) OS=Gallus gallus GN=ACTN1 PE=4 SV=1
17	2	Trembl	H9L0H3_CHICK	192	71578	49	10	19	8	0.37	0.00747173		Alpha-actinin-4 (Fragment) OS=Gallus gallus GN=ACTN4 PE=4 SV=2
18	1	Trembl	F1NW23_CHICK	320	189912	68	21	31	16	0.27	0.00545234		Uncharacterized protein (Fragment) OS=Gallus gallus GN=CLTC PE=4 SV=1
19	1	Trembl	Q5ZKM2_CHICK	276	50107	52	19	12	6	0.49	0.00989499		Elongation factor 1-alpha OS=Gallus gallus GN=RCJMB04_10b5 PE=2 SV=1
20	1	Trembl	Q6B834_CHICK	262	4913	17	12	2	2	1.67	0.0337237		Histone H4 (Fragment) OS=Gallus gallus PE=3 SV=1
21	1	Trembl	F1NAT8_CHICK	254	40642	60	18	13	6	0.63	0.0127221		Uncharacterized protein OS=Gallus gallus GN=CHAD PE=4 SV=2
22	1	Trembl	F1NH87_CHICK	247	34897	62	17	13	5	0.91	0.0183764		Glyceraldehyde-3-phosphate dehydrogenase (Fragment) OS=Gallus gallus GN=GAPDH PE=3 SV=1
23	1	Trembl	E1BWX1_CHICK	245	86940	62	17	20	8	0.39	0.00787561		Annexin OS=Gallus gallus GN=ANXA6 PE=3 SV=2
23	2	Trembl	F1NJI0_CHICK	185	36186	22	8	12	4	0.36	0.00726979		Annexin (Fragment) OS=Gallus gallus GN=ANXA5 PE=3 SV=1
24	1	Trembl	F1P494_CHICK	244	70357	104	14	18	6	0.33	0.00666397		Uncharacterized protein (Fragment) OS=Gallus gallus GN=TGFBI PE=4 SV=2
25	1	Trembl	F1N9J7_CHICK	239	50028	69	19	13	9	0.76	0.0153473		Uncharacterized protein OS=Gallus gallus GN=LOC425049 PE=3 SV=1
25	2	Trembl	F1NXR6_CHICK	155	51010	78	15	12	8	0.56	0.0113086		Uncharacterized protein OS=Gallus gallus GN=LOC100857858 PE=3 SV=2
26	1	Trembl	E1C7H6_CHICK	239	47052	43	11	14	4	0.35	0.00706785		Uncharacterized protein OS=Gallus gallus GN=SERPINF1 PE=3 SV=1
27	1	Trembl	A0A0A0MQ64_CHICK	220	15869	42	16	7	2	0.98	0.01979		Histone H2B (Fragment) OS=Gallus gallus GN=HIST1H2B5L PE=3 SV=1
28	1	Trembl	F1NLZ4_CHICK	188	43826	28	7	6	1	0.14	0.00282714		Fibromodulin OS=Gallus gallus GN=FMOD PE=4 SV=1
29	1	Trembl	F1N8W3_CHICK	184	96022	46	11	17	5	0.23	0.00464459		Uncharacterized protein OS=Gallus gallus GN=POSTN PE=4 SV=2
30	1	Trembl	F1NKF3_CHICK	165	85822	66	15	13	7	0.35	0.00706785		Uncharacterized protein OS=Gallus gallus GN=GSN PE=4 SV=1
31	1	Trembl	Q6EE60_CHICK	142	18838	12	4	5	2	0.34	0.00686591		Ribosomal protein L18 (Fragment) OS=Gallus gallus PE=2 SV=1
32	1	Trembl	F6R347_CHICK	114	17281	9	3	3	1	0.17	0.00343296		Uncharacterized protein OS=Gallus gallus GN=RPL14 PE=4 SV=1
33	1	Trembl	Q9PSD2_CHICK	112	1862	6	5	1	1	1.72	0.0347334		60 kDa NON-COLLAGENOUS phosphoprotein (Fragment) OS=Gallus gallus PE=4 SV=1
34	1	Trembl	E1BRK7_CHICK	109	40305	13	4	5	2	0.15	0.00302908		Uncharacterized protein OS=Gallus gallus GN=ANGPTL7 PE=4 SV=1
35	1	Trembl	F1NI22_CHICK	102	59862	42	6	15	4	0.27	0.00545234		ATP synthase subunit alpha OS=Gallus gallus GN=ATP5A1 PE=3 SV=1
36	1	Trembl	E1C459_CHICK	100	118746	51	12	23	7	0.18	0.00363489		Uncharacterized protein OS=Gallus gallus GN=MYO1D PE=4 SV=2
37	1	Trembl	Q6EE57_CHICK	94	21828	16	3	5	1	0.29	0.00585622		40S ribosomal protein S8 (Fragment) OS=Gallus gallus PE=2 SV=1
38	1	Trembl	E1C8Z0_CHICK	92	68811	17	5	5	3	0.13	0.0026252		Dolichyl-diphosphooligosaccharide--protein glycosyltransferase subunit 2 OS=Gallus gallus GN=RPN2 PE=4 SV=2
39	1	Trembl	F1NVA4_CHICK	91	30334	9	2	5	1	0.1	0.00201939		Nucleophosmin (Fragment) OS=Gallus gallus GN=NPM1 PE=4 SV=2
40	1	Trembl	F1NV15_CHICK	85	35356	7	1	3	1	0.08	0.00161551		Sideroflexin OS=Gallus gallus GN=SFXN3 PE=3 SV=2
41	1	Trembl	E1C6R9_CHICK	84	19871	21	2	8	1	0.15	0.00302908		Uncharacterized protein OS=Gallus gallus GN=LOC770011 PE=4 SV=2
42	1	Trembl	R4GFP0_CHICK	83	125176	27	3	14	3	0.07	0.00141357		Uncharacterized protein OS=Gallus gallus GN=TNN PE=4 SV=1
43	1	Trembl	F1NXW3_CHICK	83	17325	6	3	3	1	0.17	0.00343296		Uncharacterized protein (Fragment) OS=Gallus gallus GN=RPS15A PE=3 SV=2
45	1	Trembl	F2Z4K8_CHICK	78	16696	12	4	7	4	0.92	0.0185784		Calmodulin (Fragment) OS=Gallus gallus GN=CALM PE=4 SV=1
46	1	Trembl	Q9DDD4_CHICK	77	22158	20	4	5	2	0.45	0.00908724		Tetranectin OS=Gallus gallus GN=CLEC3B PE=2 SV=1
47	1	Trembl	H9L047_CHICK	76	28895	8	3	5	2	0.21	0.00424071		Acidic leucine-rich nuclear phosphoprotein 32 family member E OS=Gallus gallus GN=ANP32E PE=4 SV=2
48	1	Trembl	F1NIX2_CHICK	76	72599	13	3	6	2	0.08	0.00161551		Uncharacterized protein OS=Gallus gallus GN=DDX3X PE=3 SV=2
49	1	Trembl	F1NKZ3_CHICK	76	202614	21	3	12	3	0.04	0.000807754		Collagen alpha-1(XIV) chain OS=Gallus gallus GN=COL14A1 PE=4 SV=2
50	1	Trembl	H9L074_CHICK	75	35330	22	4	9	2	0.17	0.00343296		Uncharacterized protein OS=Gallus gallus PE=3 SV=2
50	2	Trembl	Q05705_CHICK	72	28655	15	4	5	2	0.22	0.00444265		Beta-tropomyosin OS=Gallus gallus GN=BRT-2 PE=2 SV=1
51	1	Trembl	E1BTT8_CHICK	73	36479	20	3	9	1	0.17	0.00343296		L-lactate dehydrogenase OS=Gallus gallus GN=LDHA PE=3 SV=2
52	1	Trembl	F1NSY1_CHICK	72	112015	20	2	11	2	0.05	0.00100969		Sodium/potassium-transporting ATPase subunit alpha (Fragment) OS=Gallus gallus GN=ATP1A1 PE=3 SV=2
53	1	Trembl	F1N8H6_CHICK	71	61814	12	3	6	2	0.15	0.00302908		Heterochromatin protein 1-binding protein 3 OS=Gallus gallus GN=HP1BP3 PE=3 SV=1
54	1	Trembl	F1NY82_CHICK	71	159527	32	3	16	3	0.06	0.00121163		Uncharacterized protein OS=Gallus gallus GN=IQGAP1 PE=4 SV=2
55	1	Trembl	F1NRP8_CHICK	71	846184	27	1	16	1		#VALUE!		Uncharacterized protein OS=Gallus gallus GN=Gga,55200 PE=4 SV=2
56	1	Trembl	E1C3Y5_CHICK	70	86131	4	1	2	1	0.03	0.000605816		Protein transport protein Sec23A OS=Gallus gallus GN=SEC23A PE=4 SV=1
57	1	Trembl	Q5ZI39_CHICK	70	70779	22	5	10	4	0.17	0.00343296		Uncharacterized protein OS=Gallus gallus GN=PLS3 PE=2 SV=1
58	1	Trembl	E1C3D2_CHICK	70	41612	11	1	6	1	0.07	0.00141357		Septin-2 OS=Gallus gallus GN=SEPT2 PE=3 SV=1
59	1	Trembl	F1NP51_CHICK	67	67897	18	3	8	2	0.09	0.00181745		Lamin-B2 OS=Gallus gallus GN=LMNB2 PE=3 SV=1
60	1	Trembl	R4GM10_CHICK	68	39336	15	2	7	2	0.15	0.00302908		Fructose-bisphosphate aldolase OS=Gallus gallus GN=ALDOC PE=3 SV=1
62	1	Trembl	Q5ZKB0_CHICK	67	22587	6	3	2	1	0.28	0.00565428		Uncharacterized protein OS=Gallus gallus GN=TMED2 PE=2 SV=1
63	1	Trembl	F1NZY9_CHICK	67	34067	7	3	3	1	0.09	0.00181745		NADH-cytochrome b5 reductase OS=Gallus gallus GN=CYB5R3 PE=3 SV=1
64	1	Trembl	F1NPA9_CHICK	67	26702	15	3	7	2	0.23	0.00464459		Uncharacterized protein OS=Gallus gallus GN=RPS3 PE=3 SV=2
65	1	Trembl	Q90838_CHICK	66	41286	4	1	2	1	0.07	0.00141357		Leucine zipper protein OS=Gallus gallus GN=PTRF PE=2 SV=1
66	1	Trembl	F1NME1_CHICK	66	21818	9	6	3	2	0.46	0.00928918		Uncharacterized protein OS=Gallus gallus GN=HIST1H111R PE=3 SV=1
67	1	Trembl	Q5G8Y9_CHICK	66	21691	20	6	5	2	0.47	0.00949111		Apolipoprotein D OS=Gallus gallus GN=ApoD PE=2 SV=1
68	1	Trembl	Q71SG2_CHICK	65	73395	11	2	6	2	0.08	0.00161551		Collapsin response mediator protein-2A OS=Gallus gallus GN=CRMP2A PE=2 SV=1
69	1	Trembl	F1NJ37_CHICK	65	20639	4	1	1	1	0.14	0.00282714		Uncharacterized protein OS=Gallus gallus GN=MYL4 PE=4 SV=2
70	1	Trembl	F1NU17_CHICK	65	44638	23	4	9	3	0.21	0.00424071		Phosphoglycerate kinase OS=Gallus gallus GN=PGK1 PE=3 SV=1
71	1	Trembl	F1NJT3_CHICK	64	273077	44	5	20	4	0.04	0.000807754		Fibronectin OS=Gallus gallus GN=FN1 PE=4 SV=1
72	1	Trembl	E1BY12_CHICK	62	105656	3	1	2	1	0.03	0.000605816		AP complex subunit beta OS=Gallus gallus GN=AP2B1 PE=3 SV=1
73	1	Trembl	F1NLB3_CHICK	62	117185	17	2	10	2	0.05	0.00100969		Neural cell adhesion molecule 1 OS=Gallus gallus GN=NCAM1 PE=4 SV=2
74	1	Trembl	E1BRS4_CHICK	60	14318	6	3	2	2	0.46	0.00928918		Uncharacterized protein OS=Gallus gallus GN=IFITM5 PE=4 SV=1
75	1	Trembl	F1NSP8_CHICK	60	74947	8	1	4	1	0.04	0.000807754		Uncharacterized protein OS=Gallus gallus GN=HNRNPU PE=4 SV=2
76	1	Trembl	R4GJT7_CHICK	60	59154	13	2	7	1	0.05	0.00100969		Uncharacterized protein OS=Gallus gallus PE=4 SV=1
78	1	Trembl	E1BV71_CHICK	58	80185	5	1	3	1	0.04	0.000807754		Uncharacterized protein OS=Gallus gallus GN=ECM2 PE=4 SV=1
79	1	Trembl	F1NDN9_CHICK	58	46010	8	2	4	2	0.13	0.0026252		Keratin, type I cytoskeletal 19 OS=Gallus gallus GN=KRT19 PE=3 SV=1
80	1	Trembl	Q92069_CHICK	57	13932	24	5	3	1	0.21	0.00424071		Histone H2A OS=Gallus gallus GN=HIST1H2A4 PE=3 SV=2
82	1	Trembl	F1P0J8_CHICK	57	129473	11	2	6	1	0.02	0.000403877		Uncharacterized protein OS=Gallus gallus GN=THBS1 PE=4 SV=2
83	1	Trembl	Q5ZKR9_CHICK	56	20516	11	3	4	2	0.31	0.0062601		Uncharacterized protein OS=Gallus gallus GN=RCJMB04_9i5 PE=2 SV=1
84	1	Trembl	Q9PSR0_CHICK	56	4772	5	3	1	1	0.65	0.013126		Annexin II=36 kDa matrix vesicles annexin OS=Gallus gallus PE=4 SV=1
85	1	Trembl	F1P2H5_CHICK	54	8805	7	3	2	2	1.43	0.0288772		Collagen alpha-1(I) chain (Fragment) OS=Gallus gallus GN=COL1A1 PE=4 SV=2
86	1	Trembl	E1C3A9_CHICK	53	141509	14	1	11	1	0.02	0.000403877		Vigilin OS=Gallus gallus GN=HDLBP PE=4 SV=1
87	1	Trembl	E1C7A7_CHICK	53	51618	15	4	4	2	0.18	0.00363489		Uncharacterized protein OS=Gallus gallus GN=VTN PE=4 SV=2
88	1	Trembl	F1NSM8_CHICK	53	29118	10	2	2	1	0.1	0.00201939		Osteopontin OS=Gallus gallus GN=SPP1 PE=4 SV=1
89	1	Trembl	D0EKR3_CHICK	53	17799	23	2	4	1	0.17	0.00343296		Peptidyl-prolyl cis-trans isomerase OS=Gallus gallus PE=2 SV=1
90	1	Trembl	F1NZ78_CHICK	52	47303	13	3	6	2	0.13	0.0026252		Alpha-enolase OS=Gallus gallus GN=ENO1 PE=3 SV=2
91	1	Trembl	Q5ZME1_CHICK	52	36962	3	1	1	1	0.08	0.00161551		Uncharacterized protein OS=Gallus gallus GN=HNRNPA2B1 PE=2 SV=1
92	1	Trembl	E1C906_CHICK	51	216703	9	2	7	2	0.03	0.000605816		Uncharacterized protein OS=Gallus gallus GN=MYLK PE=4 SV=2
93	1	Trembl	F7BYQ2_CHICK	51	33903	5	2	2	2	0.18	0.00363489		40S ribosomal protein S6 OS=Gallus gallus GN=RPS6 PE=4 SV=1
94	1	Trembl	E2IPN6_CHICK	51	16631	5	2	2	1	0.18	0.00363489		Prostaglandin E synthase OS=Gallus gallus GN=PTGES PE=2 SV=1
95	1	Trembl	Q5F354_CHICK	51	138464	27	3	16	3	0.06	0.00121163		Coatomer subunit alpha OS=Gallus gallus GN=RCJMB04_34d13 PE=2 SV=1
96	1	Trembl	Q5ZJ59_CHICK	50	40148	19	3	6	2	0.15	0.00302908		Uncharacterized protein OS=Gallus gallus GN=RCJMB04_20j14 PE=2 SV=1
97	1	Trembl	Q5F422_CHICK	50	42138	5	1	3	1	0.07	0.00141357		Uncharacterized protein OS=Gallus gallus GN=DEK PE=2 SV=1
98	1	Trembl	F1NYL7_CHICK	50	104603	7	1	4	1	0.03	0.000605816		Uncharacterized protein OS=Gallus gallus GN=TCEB3 PE=4 SV=2
99	1	Trembl	F1NI75_CHICK	50	398584	35	1	19	1	0.01	0.000201939		Uncharacterized protein OS=Gallus gallus GN=UTRN PE=4 SV=2
100	1	Trembl	F1NU40_CHICK	50	75354	12	1	6	1	0.04	0.000807754		Nucleolin OS=Gallus gallus GN=NCL PE=4 SV=2
101	1	Trembl	Q9IAU4_CHICK	50	184124	5	1	4	1	0.02	0.000403877		Alpha 1 (V) collagen OS=Gallus gallus PE=2 SV=1
102	1	Trembl	E1BTG1_CHICK	50	17727	2	1	1	1	0.17	0.00343296		Uncharacterized protein OS=Gallus gallus GN=RPL12 PE=3 SV=2
103	1	Trembl	R4GKF5_CHICK	50	23026	12	1	4	1	0.13	0.0026252		Uncharacterized protein OS=Gallus gallus GN=TMED4 PE=3 SV=1
104	1	Trembl	Q5ZL82_CHICK	50	50437	14	1	8	1	0.06	0.00121163		Isocitrate dehydrogenase [NADP] OS=Gallus gallus GN=RCJMB04_7e11 PE=2 SV=1
105	1	Trembl	F1NWX7_CHICK	49	10008	6	2	2	1	0.3	0.00605816		Uncharacterized protein OS=Gallus gallus GN=SEC61B PE=4 SV=2
106	1	Trembl	Q5ZJZ2_CHICK	49	46057	11	2	5	2	0.13	0.0026252		Uncharacterized protein OS=Gallus gallus GN=RPL3 PE=2 SV=1
107	1	Trembl	E1BQ45_CHICK	49	95934	17	1	11	1	0.03	0.000605816		Uncharacterized protein (Fragment) OS=Gallus gallus PE=4 SV=2
108	1	Trembl	F1P4F4_CHICK	48	32152	7	2	2	1	0.19	0.00383683		Uncharacterized protein OS=Gallus gallus GN=SSR1 PE=4 SV=1
109	1	Trembl	F2Z4L4_CHICK	48	32084	4	1	4	1	0.09	0.00181745		Uncharacterized protein OS=Gallus gallus GN=SET PE=3 SV=1
110	1	Trembl	R4GJK4_CHICK	48	21203	5	2	3	2	0.3	0.00605816		Uncharacterized protein OS=Gallus gallus GN=SSR3 PE=4 SV=1
111	1	Trembl	E1BZN6_CHICK	47	21470	2	1	1	1	0.14	0.00282714		Receptor expression-enhancing protein OS=Gallus gallus GN=REEP5 PE=3 SV=1
112	1	Trembl	F1NUL9_CHICK	47	54546	4	2	3	2	0.11	0.00222132		Fibrinogen beta chain OS=Gallus gallus GN=FGB PE=4 SV=2
113	1	Trembl	F1NKR8_CHICK	47	93723	9	1	2	1	0.03	0.000605816		Major vault protein OS=Gallus gallus GN=MVP PE=4 SV=2
114	1	Trembl	Z4YJB8_CHICK	47	18388	6	1	1	1	0.16	0.00323102		Destrin (Fragment) OS=Gallus gallus GN=DSTN PE=4 SV=1
115	1	Trembl	F1P5G8_CHICK	47	53905	3	1	1	1	0.05	0.00100969		Uncharacterized protein OS=Gallus gallus PE=4 SV=2
116	1	Trembl	R4GGM5_CHICK	47	25005	3	1	2	1	0.12	0.00242326		Uncharacterized protein OS=Gallus gallus GN=TMED7 PE=3 SV=1
117	1	Trembl	E1C080_CHICK	46	23586	6	1	3	1	0.12	0.00242326		Uncharacterized protein OS=Gallus gallus GN=RAB8B PE=3 SV=2
118	1	Trembl	F2Z4M5_CHICK	46	12013	10	1	2	1	0.25	0.00504847		Histone H2A OS=Gallus gallus GN=H2AFV PE=3 SV=2
119	1	Trembl	F1NSA8_CHICK	46	21357	9	1	3	1	0.14	0.00282714		Uncharacterized protein (Fragment) OS=Gallus gallus GN=RAP1A PE=1 SV=1
120	1	Trembl	F1NQW8_CHICK	46	20696	19	3	4	2	0.31	0.0062601		Serine/arginine-rich-splicing factor 1 (Fragment) OS=Gallus gallus GN=SRSF1 PE=4 SV=1
121	1	Trembl	E1C3L7_CHICK	46	87569	15	1	4	1	0.03	0.000605816		Uncharacterized protein OS=Gallus gallus PE=4 SV=2
122	1	Trembl	E1C272_CHICK	45	44702	6	1	2	1	0.07	0.00141357		Uncharacterized protein OS=Gallus gallus PE=4 SV=1
123	1	Trembl	F1NG02_CHICK	45	1012264	36	1	22	1		#VALUE!		Uncharacterized protein OS=Gallus gallus GN=SYNE1 PE=4 SV=2
124	1	Trembl	R4GJ67_CHICK	45	29034	11	1	4	1	0.1	0.00201939		Uncharacterized protein OS=Gallus gallus PE=4 SV=1
125	1	Trembl	Q92068_CHICK	45	15379	32	2	4	1	0.2	0.00403877		Histone H3 OS=Gallus gallus PE=3 SV=1
126	1	Trembl	E1BRL9_CHICK	45	28161	7	1	2	1	0.1	0.00201939		Uncharacterized protein OS=Gallus gallus GN=SRSF7 PE=4 SV=2
127	1	Trembl	Q6QIF4_CHICK	45	25048	8	1	5	1	0.12	0.00242326		Beta B2-crystallin long isoform OS=Gallus gallus PE=2 SV=1
128	1	Trembl	F1NBP0_CHICK	44	104690	20	1	8	1	0.03	0.000605816		Uncharacterized protein OS=Gallus gallus GN=THBS4 PE=4 SV=1
129	1	Trembl	Q5ZHW8_CHICK	44	16263	1	1	1	1	0.18	0.00363489		Uncharacterized protein OS=Gallus gallus GN=RPS14 PE=2 SV=1
130	1	Trembl	F1NII7_CHICK	44	301142	16	1	8	1	0.01	0.000201939		Uncharacterized protein OS=Gallus gallus GN=FBN1 PE=4 SV=2
131	1	Trembl	E1BR88_CHICK	43	86534	14	1	7	1	0.03	0.000605816		Uncharacterized protein OS=Gallus gallus GN=PHEX PE=4 SV=2
132	1	Trembl	F1P376_CHICK	43	62110	3	1	3	1	0.05	0.00100969		Protein wntless homolog OS=Gallus gallus GN=WLS PE=4 SV=1
133	1	Trembl	F1NW06_CHICK	43	26184	8	1	2	1	0.11	0.00222132		Tetraspanin OS=Gallus gallus GN=CD81 PE=3 SV=2
134	1	Trembl	F1NB52_CHICK	43	97550	12	2	6	2	0.06	0.00121163		Coatomer subunit gamma OS=Gallus gallus GN=COPG1 PE=3 SV=1
135	1	Trembl	F1NVN4_CHICK	43	83249	13	1	9	1	0.03	0.000605816		Uncharacterized protein OS=Gallus gallus PE=4 SV=2
136	1	Trembl	E1BV34_CHICK	43	68514	12	2	7	1	0.04	0.000807754		Uncharacterized protein OS=Gallus gallus GN=Gga,3145 PE=4 SV=1
137	1	Trembl	E1BZE6_CHICK	43	40830	5	1	3	1	0.07	0.00141357		Uncharacterized protein OS=Gallus gallus GN=LOC100859627 PE=4 SV=2
138	1	Trembl	Q9I9D1_CHICK	42	30179	17	1	7	1	0.1	0.00201939		Uncharacterized protein OS=Gallus gallus GN=VDAC2 PE=2 SV=1
139	1	Trembl	F1NG39_CHICK	42	118803	14	2	8	2	0.05	0.00100969		Unconventional myosin-Ic OS=Gallus gallus GN=MYO1C PE=4 SV=1
140	1	Trembl	F1NNS1_CHICK	41	48735	8	3	3	2	0.12	0.00242326		Dolichyl-diphosphooligosaccharide--protein glycosyltransferase 48 kDa subunit OS=Gallus gallus GN=DDOST PE=3 SV=2
141	1	Trembl	F1NW48_CHICK	41	47645	3	2	2	1	0.06	0.00121163		Uncharacterized protein (Fragment) OS=Gallus gallus GN=ACTR3B PE=3 SV=1
142	1	Trembl	F1NWH9_CHICK	41	57679	2	1	2	1	0.05	0.00100969		Uncharacterized protein (Fragment) OS=Gallus gallus GN=CCT6A PE=3 SV=2
143	1	Trembl	F1NUV7_CHICK	41	45892	5	1	3	1	0.06	0.00121163		Uncharacterized protein OS=Gallus gallus GN=DMP1 PE=4 SV=2
144	1	Trembl	E1C4Y1_CHICK	40	45981	5	1	3	1	0.06	0.00121163		Pannexin OS=Gallus gallus GN=PANX3 PE=3 SV=2
145	1	Trembl	E1BW21_CHICK	40	234031	13	1	9	1	0.01	0.000201939		Uncharacterized protein OS=Gallus gallus GN=MYOF PE=4 SV=2
146	1	Trembl	F1N8D4_CHICK	40	276967	36	2	25	2	0.02	0.000403877		Uncharacterized protein OS=Gallus gallus GN=FLNB PE=4 SV=2
147	1	Trembl	Q5ZII1_CHICK	40	46721	22	1	8	1	0.06	0.00121163		Uncharacterized protein OS=Gallus gallus GN=RPL4 PE=2 SV=1
148	1	Trembl	E1C016_CHICK	40	103080	13	1	7	1	0.03	0.000605816		Uncharacterized protein OS=Gallus gallus GN=COPB2 PE=4 SV=1
149	1	Trembl	F1N9R8_CHICK	39	32035	1	1	1	1	0.09	0.00181745		Uncharacterized protein (Fragment) OS=Gallus gallus GN=NUCKS1 PE=4 SV=2
150	1	Trembl	B3VHV2_CHICK	39	69803	13	2	8	2	0.09	0.00181745		Heat shock protein 70 OS=Gallus gallus GN=HSP70 PE=2 SV=1
151	1	Trembl	Q9PS14_CHICK	39	2131	1	1	1	1	1.52	0.0306947		Puromycin-sensitive aminopeptidase isozyme I (Fragment) OS=Gallus gallus PE=1 SV=1
152	1	Trembl	F1P179_CHICK	39	179751	9	1	7	1	0.02	0.000403877		Uncharacterized protein OS=Gallus gallus GN=EPRS PE=3 SV=1
153	1	Trembl	F1NQG5_CHICK	39	24117	5	1	2	1	0.12	0.00242326		Ribosomal protein L15 OS=Gallus gallus GN=RPL15 PE=3 SV=2
154	1	Trembl	F1P4K9_CHICK	38	165694	3	1	3	1	0.02	0.000403877		Uncharacterized protein OS=Gallus gallus GN=COL11A1 PE=4 SV=2
155	1	Trembl	F1NC33_CHICK	38	83435	9	1	7	1	0.03	0.000605816		Heat shock cognate protein HSP 90-beta OS=Gallus gallus GN=HSP90AB1 PE=3 SV=1
156	1	Trembl	E1C0F1_CHICK	37	60630	27	1	9	1	0.05	0.00100969		Dolichyl-diphosphooligosaccharide--protein glycosyltransferase subunit 1 (Fragment) OS=Gallus gallus GN=RPN1 PE=3 SV=2
157	1	Trembl	F1NFC6_CHICK	37	29445	7	1	3	1	0.1	0.00201939		Uncharacterized protein (Fragment) OS=Gallus gallus GN=RPS4X PE=3 SV=2
158	1	Trembl	F1NBX4_CHICK	37	16798	4	1	2	1	0.18	0.00363489		Uncharacterized protein OS=Gallus gallus GN=RPL27A PE=3 SV=2
159	1	Trembl	E1C866_CHICK	37	108939	19	1	11	1	0.03	0.000605816		Uncharacterized protein OS=Gallus gallus GN=Gga,50010 PE=4 SV=2
160	1	Trembl	F1NDP3_CHICK	37	87175	17	1	8	1	0.03	0.000605816		Uncharacterized protein (Fragment) OS=Gallus gallus GN=FAP PE=4 SV=2
161	1	Trembl	F1NZ30_CHICK	37	40178	3	1	3	1	0.07	0.00141357		Creatine kinase B-type OS=Gallus gallus GN=CKB PE=3 SV=2
162	1	Trembl	F1NEW0_CHICK	36	56483	8	1	6	1	0.05	0.00100969		Uncharacterized protein OS=Gallus gallus GN=LMAN1 PE=4 SV=1
163	1	Trembl	F1NF89_CHICK	36	15634	3	1	1	1	0.19	0.00383683		40S ribosomal protein S24 OS=Gallus gallus GN=RPS24 PE=3 SV=2
164	1	Trembl	F1NSI8_CHICK	36	21274	3	1	1	1	0.14	0.00282714		Uncharacterized protein OS=Gallus gallus PE=4 SV=2
165	1	Trembl	E1C8M9_CHICK	36	68326	6	1	4	1	0.04	0.000807754		Uncharacterized protein OS=Gallus gallus GN=CANX PE=3 SV=2
166	1	Trembl	F2Z4K7_CHICK	36	29848	11	1	4	1	0.1	0.00201939		40S ribosomal protein S3a OS=Gallus gallus GN=RPS3A PE=3 SV=1
167	1	Trembl	F1N9H3_CHICK	36	55752	16	1	11	1	0.05	0.00100969		Protein disulfide-isomerase OS=Gallus gallus GN=P4HB PE=3 SV=2
168	1	Trembl	E1BRC1_CHICK	36	18187	3	1	1	1	0.16	0.00323102		Uncharacterized protein OS=Gallus gallus GN=CD99 PE=4 SV=1
169	1	Trembl	F1NTT2_CHICK	36	7836	1	1	1	1	0.38	0.00767367		Uncharacterized protein OS=Gallus gallus GN=RPS28 PE=3 SV=2
170	1	Trembl	E1C6J9_CHICK	36	18161	5	1	3	1	0.16	0.00323102		Thy-1 membrane glycoprotein OS=Gallus gallus GN=THY1 PE=4 SV=2
171	1	Trembl	F1NX60_CHICK	35	78116	6	1	3	1	0.04	0.000807754		Fibulin-1 OS=Gallus gallus GN=FBLN1 PE=3 SV=1
172	1	Trembl	F1NSI3_CHICK	35	16175	4	1	2	1	0.18	0.00363489		Uncharacterized protein OS=Gallus gallus GN=CYB5B PE=3 SV=1
173	1	Trembl	E1BV78_CHICK	35	49923	15	1	6	1	0.06	0.00121163		Uncharacterized protein OS=Gallus gallus GN=FGG PE=4 SV=2
174	1	Trembl	F1NTJ5_CHICK	35	131986	24	1	14	1	0.02	0.000403877		Uncharacterized protein OS=Gallus gallus GN=MYO1B PE=4 SV=2
175	1	Trembl	F1P5V6_CHICK	35	21897	4	1	2	1	0.13	0.0026252		Uncharacterized protein OS=Gallus gallus GN=MYL3 PE=4 SV=1
176	1	Trembl	F1P1A5_CHICK	35	68411	9	1	6	1	0.04	0.000807754		Uncharacterized protein OS=Gallus gallus GN=TKT PE=4 SV=2
177	1	Trembl	R4GGJ0_CHICK	34	16403	6	1	4	1	0.18	0.00363489		Uncharacterized protein OS=Gallus gallus GN=RPS16 PE=3 SV=1
178	1	Trembl	Q9YGP0_CHICK	34	51316	11	1	5	1	0.06	0.00121163		Clusterin OS=Gallus gallus PE=2 SV=1
179	1	Trembl	E1C3I7_CHICK	34	51802	11	1	5	1	0.06	0.00121163		Calcium/calmodulin-dependent protein kinase type II delta chain (Fragment) OS=Gallus gallus GN=CAMK2D PE=4 SV=2
180	1	Trembl	E1BUZ5_CHICK	34	14158	9	1	4	1	0.21	0.00424071		Uncharacterized protein (Fragment) OS=Gallus gallus GN=RPLP2 PE=3 SV=2
181	1	Trembl	Q9YHD2_CHICK	34	84127	12	1	5	1	0.03	0.000605816		Nuclear calmodulin-binding protein (Fragment) OS=Gallus gallus GN=URP PE=2 SV=1
182	1	Trembl	F1N9Z7_CHICK	33	56138	20	1	10	1	0.05	0.00100969		Succinyl-CoA:3-ketoacid-coenzyme A transferase OS=Gallus gallus GN=OXCT1 PE=3 SV=2
183	1	Trembl	Q9YH14_CHICK	33	8334	3	1	2	1	0.36	0.00726979		Progesterone receptor binding protein OS=Gallus gallus GN=rbf PE=2 SV=1
184	1	Trembl	F1NG53_CHICK	33	21511	9	1	4	1	0.14	0.00282714		Uncharacterized protein (Fragment) OS=Gallus gallus GN=RPL17 PE=3 SV=2
										49.52
